# Supplementary material for: Identification and expression analysis of WRKY gene family under drought stress in peanut (Arachis hypogaea L.)
Source: PubMed Central journal article supplement (PMC7144997; doi:10.1371/journal.pone.0231396), 2020-04-09

## S1 File. Analysis and distribution of conserved motifs in peanut WRKY proteins.

| Motif | Width | E value   | Best possible match                                                                                                    |
|-------|-------|-----------|------------------------------------------------------------------------------------------------------------------------|
| 1     | 29    | 1.2e-1036 | [PA]R[VF][VSA][VF][QR][TA][RT]S[ED]VDILDDG[YC][RQ]WRKYGQKV[VA]K                                                        |
| 2     | 30    | 7.0e-1006 | [ES]D[IPL][PS][DES]DG[YW][NAS]WRKYGQK[PQ][IV]KGS[PE]YPR[SG]YY[KR]C                                                     |
| 3     | 31    | 9.0e-998  | GC[PN]V[RK]K[HRQ]V[EQ]R[ACL][SA]EDP[KSRT][IAM][VL][IV]TTYEGKHNH[PD][VL]P                                               |
| 4     | 26    | 4.2e-1007 | DGY[NR]WRKYGQKQ[VI]KG[SN][PE][YF]PRSY[RY]C[TS]                                                                         |
| 5     | 32    | 1.6e-940  | [ST][SA][KPR]GCP[AV][RK]K[QH]V[EQ]R[SC]R[EDT]DP[TS][MI][LF][IV][VT]TY[ET]GEHNH[PS]                                     |
| 6     | 29    | 9.8e-570  | IL[DE]DGYQWRKYGQKV[VIT]K[GN][SN]P[YN]PR[SA]YY[RY]C[ST]                                                                 |
| 7     | 32    | 2.0e-544  | HPNCPVKKKVERS[HL]DG[QH]ITEI[IV]YKG[TQ]HNHPKP                                                                           |
| 8     | 27    | 7.9e-483  | QGCP[AV][KT]K[QHR]V[QE]R[IS]Q[DE][DN]P[TP][LI][VY][IER]TTY[EY]GXH                                                      |
| 9     | 11    | 3.8e-325  | [GN][NS]P[NCH]PR[SA]YY[RY]C                                                                                            |
| 10    | 42    | 7.00E-284 | [LM]E[RE][VLM][KN][EA]EN[KQ][RK]L[RK]E[MT][LV][EN][QH][VI][CM][ESK][NS]YXALQM[QHK][LF]SN[LI][ML][QN][NK][KNQ]QXKEV[SE] |

Numbers correspond to the motifs in Fig 3B

Motif 1

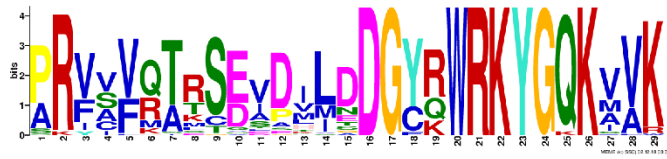

Motif 2

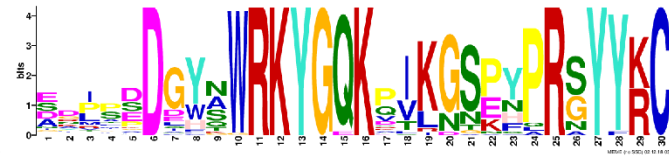

Motif 3

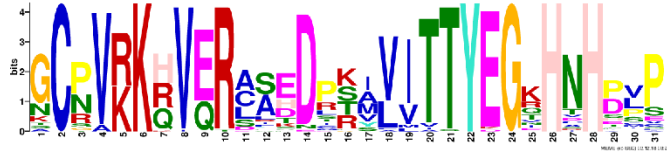

Motif 4

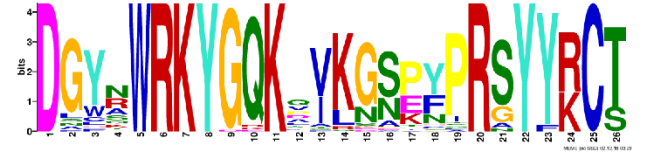

Motif 5

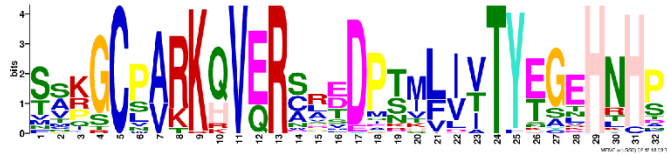

Motif 6

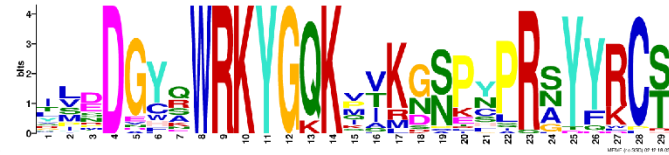

Motif 7

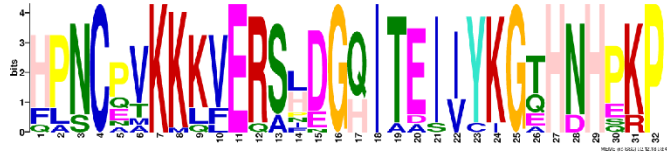

Motif 8

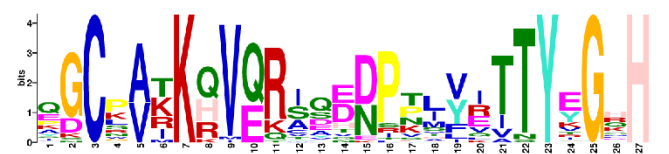

Motif 9

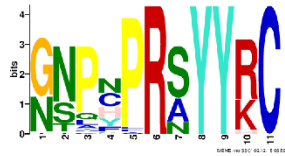

Motif 10

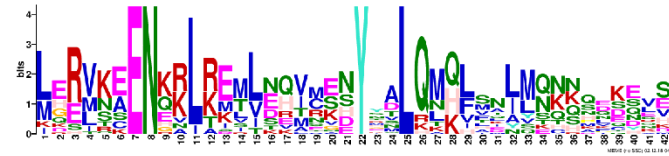

Supplement: pone.0231396.s003.pdf [file pone.0231396.s003.pdf]
