# Supplementary material for: Identification and expression analysis of WRKY gene family under drought stress in peanut (Arachis hypogaea L.)
Source: PubMed Central journal article supplement (PMC7144997; doi:10.1371/journal.pone.0231396), 2020-04-09

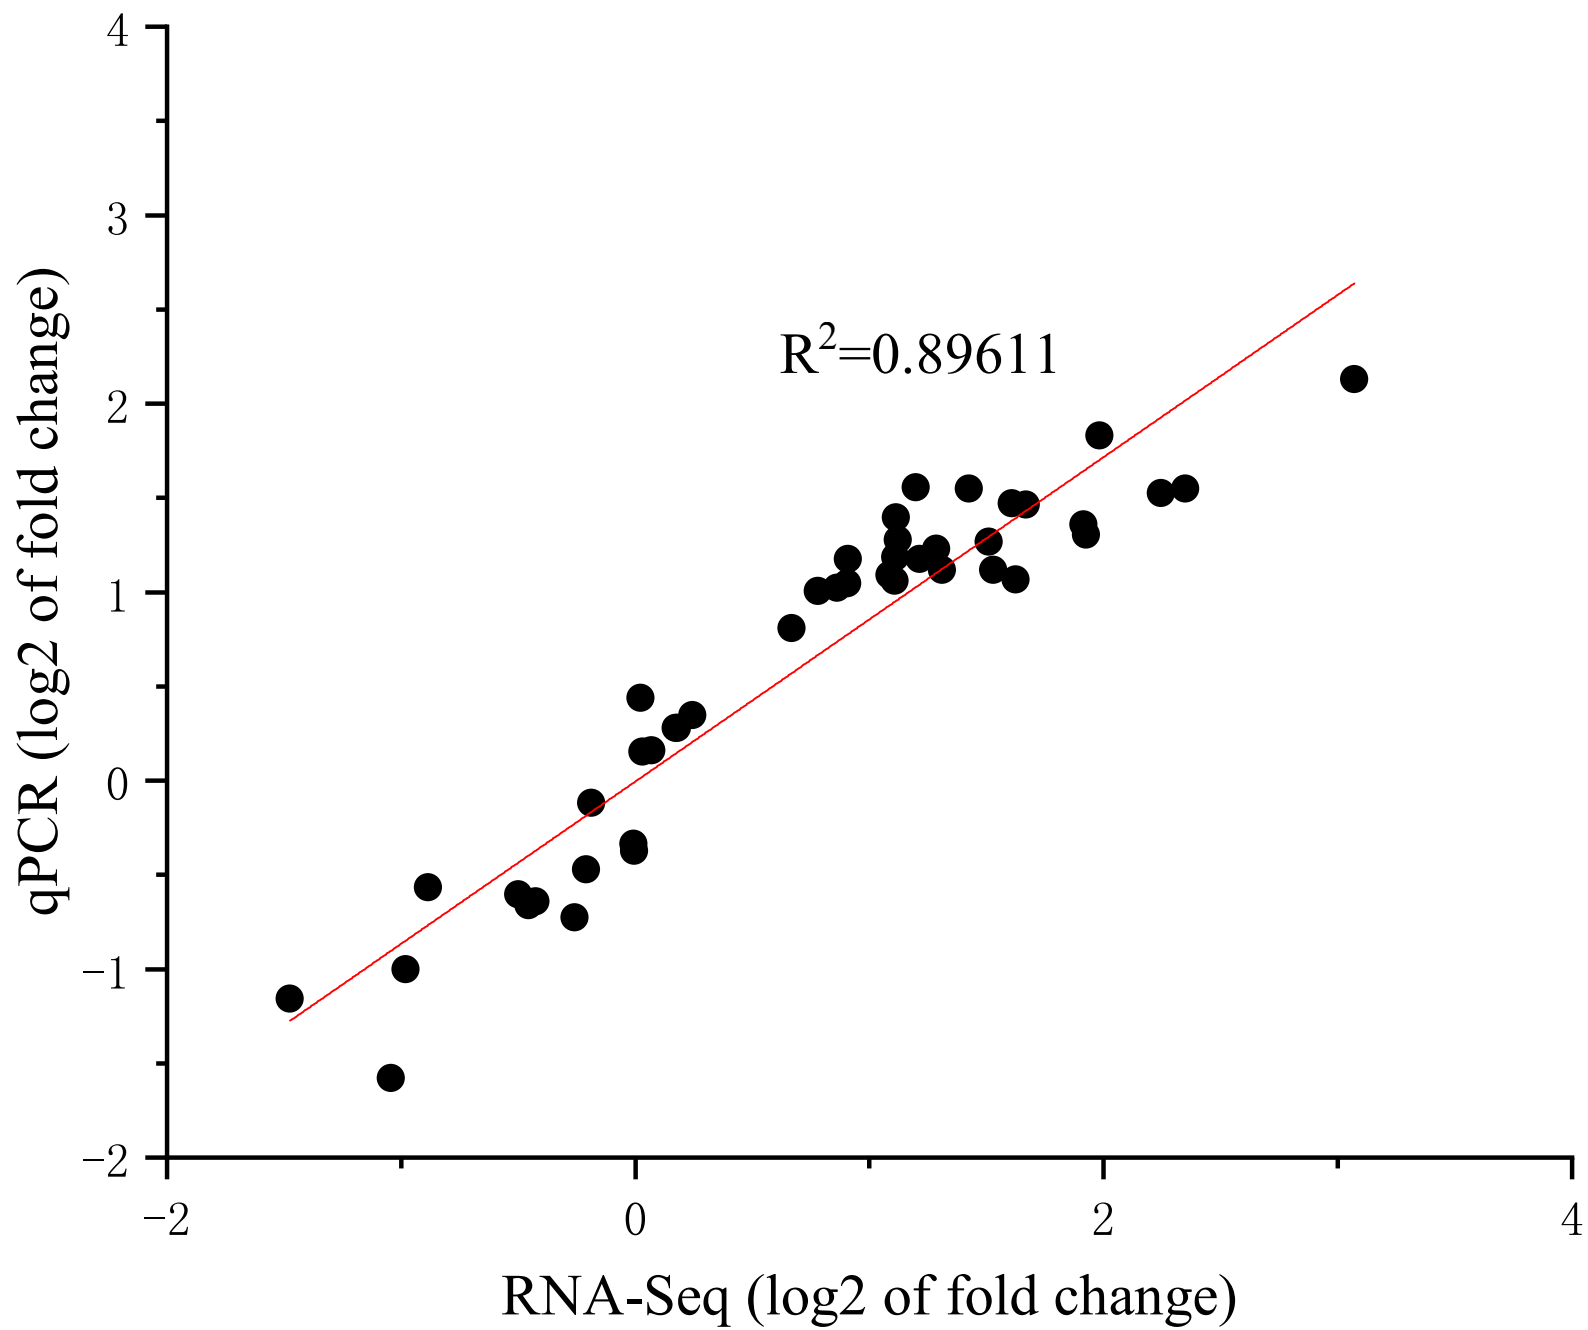

Supplement: pone.0231396.s002.pdf [file pone.0231396.s002.pdf]
