# Supplementary material for: Identification and expression analysis of WRKY gene family under drought stress in peanut (Arachis hypogaea L.)
Source: PLoS One. 2020 Apr 9;15(4):e0231396. doi: 10.1371/journal.pone.0231396 (PMC7144997; doi:10.1371/journal.pone.0231396)
Supplement: S1 Fig — The highly conserved WRKYGQK heptapeptide, and the amino acids forming the zinc-finger motif were covered in blue boxes, while the mutated amino acids were marked in red. (PDF) [file pone.0231396.s001.pdf]

Group I\_N

AtWRKY33N : EDGYNWRKYGQFQVKGSENPRSYKKCT-F--PNCPTKKKVER-SLEGQITEIVYKGSFNHP  
AhWRKY50N : EDGYNWRKYGQFQVKGSENPRSYKKCT-H--PNCAMKKKVER-SLEGQITEIVYKGTNHP  
AhWRKY133N : EDGYNWRKYGQFQVKGSENPRSYKKCT-H--PNCAMKKKVER-SLEGQITEIVYKGTNHP  
AhWRKY56N : DDGYNWRKYGQFQVKGSENPRSYKKCT-F--PNCPTKKKVER-SLDGQITEIVYKGTNHP  
AhWRKY131N : DDGYNWRKYGQFQVKGSENPRSYKKCT-F--PNCPTKKKVER-SLDGQITEIVYKGTNHP  
AhWRKY139N : DDGYNWRKYGQFQVKGSENPRSYKKCT-F--PNCPTKKKVER-SLDGQITEIVYKGTNHP  
AhWRKY153N : DDGYNWRKYGQFQVKGSENPRSYKKCT-F--PNCPTKKKVER-SLDGQITEIVYKGTNHP  
AhWRKY122N : DDGYNWRKYGQFQVKGSENPRSYKKCT-F--PNCPTKKKVER-SLDGQITEIVYKGTNHP  
AhWRKY48N : -DGYNWRKYGQFQVKGSEYPRSYKKCT-H--PNCVVKKKVER-SFDGQIAEIVYKGFNHP  
AhWRKY130N : -DGYNWRKYGQFQVKGSEYPRSYKKCT-H--PNCVVKKKVER-SFDGQIAEIVYKGFNHP  
AhWRKY34N : EDGYNWRKYGQFQVKGSEYPRSYKKCT-Q--PNCQVKKKVER-SHDGQITEIIVYKGTNHP  
AhWRKY115N : EDGYNWRKYGQFQVKGSEYPRSYKKCT-Q--PNCQVKKKVER-SHDGQITEIIVYKGTNHP  
AhWRKY42N : EDGYNWRKYGQFQVKGSEYPRSYKKCT-H--PNCVVKKKVER-SHEGHITEIIVYKGFNHP  
AhWRKY124N : EDGYNWRKYGQFQVKGSEYPRSYKKCT-H--PNCVVKKKVER-SHEGHITEIIVYKGFNHP  
AhWRKY13 : EDGYNWRKYGQFQVKGSEYPRSYKKCT-H--SNCPVKDKVEQ-SHEGHITKIIVYKGFNHP  
AhWRKY78N : DDGYNWRKYGQFLVKGSEFPRSYKKCT-H--PNCVVKKKVER-SHDGQITEIIVYKGTNHP  
AhWRKY136N : DDGYNWRKYGQFLVKGSEFPRSYKKCT-H--PNCVVKKKVER-SHDGQITEIIVYKGTNHP  
AhWRKY53N : DDGYNWRKYGQFLVKGSEFPRSYKKCT-H--PNCVVKKKVER-SHDGQITEIIVYKGTNHP  
AhWRKY1N : DDGYNWRKYGQFLVKGSEFPRSYKKCT-H--PNCVVKKKVER-SHDGQITEIIVYKGTNHP  
AhWRKY52N : KDGYNWRKYGQFNVGKNEFIRSYKKCT-H--PNCQAKKQLEQ-SNDGQITDSICIGQFNHP  
AhWRKY135N : KDGYNWRKYGQFNVGKNEFIRSYKKCT-H--PNCQAKKQLEQ-SNDGQITDSICIGQFNHP  
AhWRKY37N : DDGYNWRKYGQFQVKGSEFPRSYKKCT-H--LNCVVKKKVER-APDGHITEIIVYKGFNHP  
AhWRKY118N : DDGYNWRKYGQFQVKGSEFPRSYKKCT-H--LNCVVKKKVER-APDGHITEIIVYKGFNHP  
AhWRKY77N : DDGYNWRKYGQFQVKGSEFPRSYKKCT-H--LSCNVKKKVER-AIDGHITEIIVYKGFNHP  
AhWRKY158N : DDGYNWRKYGQFQVKGSEFPRSYKKCT-H--LSCNVKKKVER-AIDGHITEIIVYKGFNHP  
AhWRKY40N : DDGYNWRKYGQFQVKGSEFPRSYKKCT-H--ASCVVKKKVER-SLNGHITAIIVYKGFNHP  
AhWRKY121N : DDGYNWRKYGQFQVKGSEFPRSYKKCT-H--ASCVVKKKVER-SLDGKITAIIVYKGFNHP  
AhWRKY14N : DDGYNWRKYGQFRTKGGENPRSYRCG-E--PNCMTMKKKVER-NLDGKITAIIMYKGFNHP  
AhWRKY91N : -DGYNWRKYGQFRTKGGENPRSYRCG-E--PNCMTMKKKVER-NLDGKITAIIMYKGFNHP  
AhWRKY4N : -DGYNWRKYGQFQVKSPTGSRSYRCCT-H--SECAAKKIECN-DDAGRVIDVVYKSQSHD  
AhWRKY84N : -DGYNWRKYGQFQVKSPTGSRSYRCCT-H--SECAAKKIECN-DDAGRVIDVVYKSQSHD

Group I\_C

AtWRKY33C : DDGYRWRKYGQFVVKGNPNPRSYKKCT-T--IGCPVRKKHVERASHDMRAVITTYEGKNHD  
AhWRKY52C : DDGYRWRKYGQFVVKGNPNPRSYRCSS--PGCPVKKHVERASHDSKVITTYEGQHDHE  
AhWRKY135C : DDGYRWRKYGQFVVKGNPNPRSYRCSS--PGCPVKKHVERASHDSKVITTYEGQHDHE  
AhWRKY4C : -DGYRWRKYGQFVVKGNPNPRNYRCCT-S--AGCPVRKHLETAVDNSNAVITTYEGQHDH  
AhWRKY84C : -DGYRWRKYGQFVVKGNPNPRN-----  
AhWRKY56C : DDGYRWRKYGQFVVKGNPNPRSYKKCT-H--PGCPVRKKHVERASHDLRAVITTYEGKNHD  
AhWRKY139C : DDGYRWRKYGQFVVKGNPNPRSYKKCT-H--PGCPVRKKHVERASHDLRAVITTYEGKNHD  
AhWRKY78C : DDGYRWRKYGQFVVKGNPNPRSYKKCT-N--AGCPVRKHVERASHDPKAVITTYEGKNHD  
AhWRKY136C : DDGYRWRKYGQFVVKGNPNPRSYKKCT-N--AGCPVRKHVERASHDPKAVITTYEGKNHD  
AhWRKY1C : DDGYRWRKYGQFVVKGNPNPRSYKKCT-N--AGCPVRKHVERASHDPKAVITTYEGKNHD  
AhWRKY53C : DDGYRWRKYGQFVVKGNPNPRSYKKCT-N--AGCPVRKHVERASHDPKAVITTYEGKNHD  
AhWRKY42C : DDGYRWRKYGQFVVKGNPNPRSYKKCT-N--AGCTVRKHVERESHDLKSVITTYEGKNHD  
AhWRKY124C : DDGYRWRKYGQFVVKGNPNPRSYKKCT-N--AGCTVRKHVERASHDLKSVITTYEGKNHD  
AhWRKY34C : DDGYRWRKYGQFVVKGNPNPRSYKKCT-S--AGCPVRKHVERASHNTKYVITTYEGKNHE  
AhWRKY115C : DDGYRWRKYGQFVVKGNPNPRSYKKCT-S--AGCPVRKHVERASHNTKYVITTYEGKNHE  
AhWRKY14C : DDGYRWRKYGQFVVKGNPNPRNYRCV-S--PGCNVKKHVERAADDIKSVMTTYEGKNHD  
AhWRKY91C : DDGYRWRKYGQFVVKGNPNPRNYRCV-S--PGCNVKKHVERAADDIKSVMTTYEGKNHD  
AhWRKY122C : DDGYRWRKYGQFVVKGNPNPR-----  
AhWRKY93 : DDGYRWRKYGQFVVKGNPNPRSYKKCT-A--PGCSVRKHVERAATDIKSVITTYEGKNHD  
AhWRKY92 : DDGYRWRKYGQFVVKGNPNPRSYKKCT-A--PGCSVRKHVERAATDIKSVITTYEGKNHD  
AhWRKY50C : DDGYRWRKYGQFVVKGNPNPRSYKKCT-A--PGCSVRKHVERAATDIKSVITTYEGKNHD  
AhWRKY133C : DDGYRWRKYGQFVVKGNPNPRSYKKCT-A--PGCSVRKHVERAATDIKSVITTYEGKNHD  
AhWRKY5 : DDGYRWRKYGQFVVKGNPNPRSYKKCT-A--PGCSVRKHVERAATDIKSVITTYEGKNHD  
AhWRKY131C : DDGYRWRKYGQFV-----  
AhWRKY153C : DDGYRWRKYGQFVVKGNPNPRSLTQLCH-H-----  
AhWRKY37C : DDGYRWRKYGQFVVKGNPNPRSYKKCT-S--AGCNVRKHVERASSDPKAVITTYEGKNHD  
AhWRKY118C : DDGYRWRKYGQFVVKGNPNPRSYKKCT-S--AGCNVRKHVERASSDPKAVITTYEGKNHD  
AhWRKY77C : DDGYRWRKYGQFVVKGNPNPRSYKKCT-S--AGCNVRKHVERASSDPKAVITTYEGKNHD  
AhWRKY158C : DDGYRWRKYGQFVVKGNPNPRSYKKCT-S--AGCNVRKHVERASSDPKAVITTYEGKNHD  
AhWRKY40C : DDGYRWRKYGQFVVKGNPNPRSYKKCT-T--PGCNVRKHVERASTDPKAVITTYEGKNHD  
AhWRKY121C : DDGYRWRKYGQFVVKGNPNPRSYKKCT-T--PGCNVRKHVERASTDPKAVITTYEGKNHD  
AhWRKY48C : -DGYRWRKYGQFVVKGNPNPRSYRCCT-N--VKCNVRKHVERAIDDPRAVITTYEGKNHE  
AhWRKY130C : -DGYRWRKYGQFVVKGNPNPRSYRCCT-N--VKCNVRKHVERAIDDPRAVITTYEGKNHE

Group II a

AtWRKY60 : KDGYQWRKYGQFVTRDNPSPRAYFRCSFS--PSCLVKKKQVQSAEDPSFLVATYEGTNHT  
AhWRKY51 : MDGYQWRKYGQFVTRDNPSPRAYFRCSFA--PCPVKKKQVQSVEDPTILVATYEGENHG  
AhWRKY134 : MDGYQWRKYGQFVTRDNPSPRAYFRCSFA--P-----TTEGEGENHG  
AhWRKY68 : KDGYQWRKYGQFVTRDNPSPRAYFRCSFA--PCPVKKKQVQSVEDQSVLIVATYEGENHP  
AhWRKY148 : KDGYQWRKYGQFVTRDNPSPRAYFRCSFA--PCPVKKKQVQSVEDQSVLIVATYEGENHP  
AhWRKY7 : RDGYQWRKYGQFVTRDNPSPRAYFRCSNA--PNCVKKKQVQSAEDRRLIVATYEGENH  
AhWRKY157 : RDGYQWRKYGQFVTRDNPSPRAYFRCSNA--PNCVKKKQVQSAEDRRLIVATYEGENH

Group II b

AtWRKY47 : NDGCQWRKYGQFMAKGNPCPRAYYRCCTMA--VGCVPVRKQVQCAEDRTILITTYEGTNHP  
AhWRKY7 : SDGCQWRKYGQFMAKGNPCPRAYYRCCTMA--VGCVPVRKQVQCAEDRTILITTYEGTNHP  
AhWRKY82 : SDGCQWRKYGQFMAKGNPCPRAYYRCCTMA--VGCVPVRKQVQCAEDRTILITTYEGTNHP  
AhWRKY26 : SDGCQWRKYGQFMAKGNPCPRAYYRCCTMA--VGCVPVRKQVQCAEDRTILITTYEGTNHP  
AhWRKY108 : SDGCQWRKYGQFMAKGNPCPRAYYRCCTMA--VGCVPVRKQVQCAEDRTILITTYEGTNHP  
AhWRKY15 : TDGCQWRKYGQFMAKGNPCPRAYYRCCTMA--SGCPVRKQVQCAEDRTILITTYEGTNHP  
AhWRKY95 : TDGCQWRKYGQFMAKGNPCPRAYYRCCTMA--SGCPVRKQVQCAEDRTILITTYEGTNHP  
AhWRKY65 : TDGCQWRKYGQFMAKGNPCPRAYYRCCTMA--AGCPVRKQVQCAEDRTILITTYEGTNHP  
AhWRKY44 : TDGCQWRKYGQFMAKGNPCPRAYYRCCTMA--AGCPVRKQVQCAEDRTILITTYEGTNHP  
AhWRKY128 : SDGCQWRKYGQFMAKGNPCPRAYYRCCTMA--AGCPVRKQVQCAEDRTILITTYEGTNHP  
AhWRKY54 : ADGCQWRKYGQFMAKGNPCPRAYYRCCTMS--TGCPVRKQVQCAEDRTILITTYEGTNHP  
AhWRKY137 : ADGCQWRKYGQFMAKGNPCPRAYYRCCTMS--T-----GQTNHP  
AhWRKY9 : NDGCQWRKYGQFISKGNPCPRAYYRCCTVA--PSCPVRKQVQCAEDMSILITTYEGTNHP  
AhWRKY80 : NDGCQWRKYGQFISKGNPCPRAYYRCCTVA--PSCPVRKQVQCAEDMSILITTYEGTNHP  
AhWRKY36 : NDGCQWRKYGQFIAGKNPCPRAYYRCCTVA--PACPVRKQVQCAEDLSILITTYEGTNHP  
AhWRKY117 : NDGCQWRKYGQFIAGKNPCPRAYYRCCTVA--PACPVRKQVQCAEDLSILITTYEGTNHP  
AhWRKY22 : NDGCQWRKYGQFIAGKNPCPRAYYRCCTVA--PGCPVRKQVQCIDMSILITTYEGTNHP  
AhWRKY104 : NDGCQWRKYGQFIAGKNPCPRAYYRCCTVA--PGCPVRKQVQCIDMSILITTYEGTNHP  
AhWRKY70 : NDGCQWRKYGQFIAGKNPCPRAYYRCCT-----VQCLDDMSILITTYEGTNHP  
AhWRKY151 : NDGCQWRKYGQFIAGKNPCPRAYYRCCTVA--PGCPVRKQVQCLDDMSILITTYEGTNHP  
AhWRKY102 : NDGCQWRKYGQFIAGKNPCPRAYYRCCTVS--SSCPVRKQVQCAQDMSILITTYEGTNHP  
AhWRKY8 : VDGCQWRKYGQFTSKGNPCPRAYYRCCTSMG--QTCVPRKQVQCAMDERVITTYEGTNHP  
AhWRKY81 : VDGCQWRKYGQFTSKGNPCPRAYYRCCTSMG--QTCVPRKQVQCAMDERVITTYEGTNHP

Group II c

AtWRKY48 : DDGYRWRKYGQFVAVKNSPYPRSYRCCT-T--VGCVVKKQVQSSDDPSIVMTTYEGQTHP  
AhWRKY6 : DDGYRWRKYGQFVAVKNSPYPRSYRCCT-T--SGCVVKKQVQSSDDPSIVMTTYEGQTHP  
AhWRKY83 : DDGYRWRKYGQFVAVKNSPYPRSYRCCT-T--SGCVVKKQVQSSDDPSIVMTTYEGQTHP  
AhWRKY21 : EDGYRWRKYGQFVAVKNSPFPRSYRCCT-N--NNSCVKKQVQSSDDPTIVITTYEGQCHH  
AhWRKY103 : EDGYRWRKYGQFVAVKNSPFPRSYRCCT-N--NNSCVKKQVQSSDDPTIVITTYEGQCHH  
AhWRKY45 : EDGYRWRKYGQFVAVKNSPFPRSYRCCT-S--GSCNVKKQVQSFDDPTIVITTYEGQTHP  
AhWRKY127 : EDGYRWRKYGQFVAVKNSPFPRSYRCCT-S--GSCNVKKQVQSFDDPTIVITTYEGQTHP  
AhWRKY150 : EDGYRWRKYGQFVAVKNSPFPRSYRCCT-S--ASCNVKKQVQSFDDPTIVITTYEGQTHP  
AhWRKY24 : EDGYRWRKYGQFVAVKNSPYPRSYRCCT-T--QKCSVKKQVQSDPTIVITTYEGQTHP  
AhWRKY106 : EDGYRWRKYGQFVAVKNSPYPRSYRCCT-T--QKCSVKKQVQSDPTIVITTYEGQTHP  
AhWRKY55 : EDGYRWRKYGQFVAVKNSPYPRSYRCCT-T--QKCSVKKQVQSDPTIVITTYEGQTHP  
AhWRKY138 : EDGYRWRKYGQFVAVKNSPY-----RSYQDPSIVITTYEGQTHP  
AhWRKY11 : DDGYRWRKYGQFVAVKNSPYPRSYRCCT-H--HTCNVKKQVQRLSKDTSIVITTYEGTHP  
AhWRKY114 : DDGYRWRKYGQFVAVKNSPYPRSYRCCT-H--HTCNVKKQVQRLSKDTSIVITTYEGTHP  
AhWRKY49 : DDGYRWRKYGQFVAVKNSPYPRSYRCCT-H--QGCNVKKQVQRLSKDTSIVITTYEGTHP  
AhWRKY132 : DDGYRWRKYGQFVAVKNSPYPRSYRCCT-S-----  
AhWRKY99 : DDGYRWRKYGQFVAVKNSPYPRSYRCCT-S--Y--RGCNVKKQVQRLSKDTSIVITTYEGTHP  
AhWRKY20 : DDGYRWRKYGQFVAVKNSPYPRSYRCCT-S-----  
AhWRKY101 : DDGYRWRKYGQFVAVKNSPYPRSYRCCT-S--EGCVVKKQVQRLSKDTSIVITTYEGTHP  
AhWRKY74 : DDGYRWRKYGQFVAVKNSPYPRSYRCCT-S--VGCVVKKQVQRLSKDTSIVITTYEGTHP  
AhWRKY155 : DDGYRWRKYGQFVAVKNSPYPRSYRCCT-S--VGCVVKKQVQRLSKDTSIVITTYEGTHP  
AhWRKY64 : DDGYRWRKYGQFVAVKNSPYPRSYRCCT-S--VGCVVKKQVQRLSKDTSIVITTYEGTHP  
AhWRKY142 : DDGYRWRKYGQFVAVKNSPYPRSYRCCT-S--VGCVVKKQVQRLSKDTSIVITTYEGTHP  
AhWRKY28 : DDGYRWRKYGQFVAVKNSPYPRSYRCCT-T--IGCNVKKQVQRLSKDTSIVITTYEGTHP  
AhWRKY110 : DDGYRWRKYGQFVAVKNSPYPRSYRCCT-A--IGCNVKKQVQRLSKDTSIVITTYEGTHP  
AhWRKY29 : DDGYRWRKYGQFVAVKNSPYPRSYRCCT-A--IGCNVKKQVQRLSKDTSIVITTYEGTHP  
AhWRKY90 : DDGYRWRKYGQFVAVKNSPYPRSYRCCT-A--IGCNVKKQVQRLSKDTSIVITTYEGTHP  
AhWRKY89 : DDGYRWRKYGQFVAVKNSPYPRSYRCCT-A--IGCNVKKQVQRLSKDTSIVITTYEGTHP  
AhWRKY31 : DDGYRWRKYGQFVAVKNSPYPRSYRCCT-T--IGCNVKKQVQRLSKDTSIVITTYEGTHP  
AhWRKY19 : DDGYRWRKYGQFVAVKNSPYPRSYRCCT-Q--DNCVVKKQVQRLSKDTSIVITTYEGTHP  
AhWRKY100 : DDGYRWRKYGQFVAVKNSPYPRSYRCCT-Q--DNCVVKKQVQRLSKDTSIVITTYEGTHP  
AhWRKY75 : DDGYRWRKYGQFVAVKNSPYPRSYRCCT-E--EKCVRKKQVQRLSKDTSIVITTYEGTHP  
AhWRKY156 : DDGYRWRKYGQFVAVKNSPYPRSYRCCT-E--EKCVRKKQVQRLSKDTSIVITTYEGTHP  
AhWRKY35 : DDGYRWRKYGQFVAVKNSPYPRSYRCCT-H--SNCRVKKQVQRLSKDTSIVITTYEGTHP  
AhWRKY116 : DDGYRWRKYGQFVAVKNSPYPRSYRCCT-H--SNCRVKKQVQRLSKDTSIVITTYEGTHP  
AhWRKY69 : DDGYRWRKYGQFVAVKNSPYPRSYRCCT-H--SNCRVKKQVQRLSKDTSIVITTYEGTHP  
AhWRKY149 : DDGYRWRKYGQFVAVKNSPYPRSYRCCT-H--SNCRVKKQVQRLSKDTSIVITTYEGTHP  
AhWRKY30 : DDGYRWRKYGQFVAVKNSPYPRSYRCCT-N--PRCSAKKQVQRLSKDTSIVITTYEGTHP  
AhWRKY111 : DDGYRWRKYGQFVAVKNSPYPRSYRCCT-N--PRCSAKKQVQRLSKDTSIVITTYEGTHP

Group II d

AtWRKY11 : PDEYSWRKYGQFPIKGSPPRCGYKCSSTF--RGCPCARKHVERALDDPAMLIVTYEGENHP  
AhWRKY16 : PDEFSWRKYGQFPIKGSPPRCGYKCSSTV--RGCPCARKHVERALDDPAMLIVTYEGENHP  
AhWRKY96 : PDEFSWRKYGQFPIKGSPPRCGYKCSSTV--RGCPCARKHVERALDDPAMLIVTYEGENHP  
AhWRKY67 : ADEYSWRKYGQFPIKGSPPRCGYKCSSTV--RGCPCARKHVERALDDPAMLIVTYEGENHP  
AhWRKY147 : ADEYSWRKYGQFPIKGSPPRCGYKCSSTV--RGCPCARKHVERALDDPAMLIVTYEGENHP  
AhWRKY2 : PDDYSWRKYGQFPIKGSPPRCGYKCSSTV--RGCPCARKHVERALDDPAMLIVTYEGENHP  
AhWRKY79 : PDDYSWRKYGQFPIKGSPPRCGYKCSSTV--RGCPCARKHVERALDDPAMLIVTYEGENHP  
AhWRKY12 : PDDYSWRKYGQFPIKGSPPRCGYKCSSTV--RGCPCARKHVERALDDPAMLIVTYEGENHP  
AhWRKY94 : PDDYSWRKYGQFPIKGSPPRCGYKCSSTV--RGCPCARKHVERALDDPAMLIVTYEGENHP  
AhWRKY47 : PDDYSWRKYGQFPIKGSPPRCGYKCSSTV--RGCPCARKHVERALDDPAMLIVTYEGENHP  
AhWRKY125 : PDDYSWRKYGQFPIKGSPPRCGYKCSSTV--RGCPCARKHVERALDDPAMLIVTYEGENHP  
AhWRKY3 : PDEYSWRKYGQFPIKGSPPRCGYKCSSTV--RGCPCARKHVERALDDPAMLIVTYEGENHP  
AhWRKY85 : PDEYSWRKYGQFPIKGSPPRCGYKCSSTV--RGCPCARKHVERALDDPAMLIVTYEGENHP

Group II e

AtWRKY22 : -DVAWRKYGQFPIKGSPPRCGYKCSSTV--KGCCLARKQVERNRSDPKMFIIVTYTAENHP  
AhWRKY33 : -DIWAWRKYGQFPIKGSPPRCGYKCSSTV--KGCCLARKQVERNRSDPKMFIIVTYTAENHP  
AhWRKY113 : -DIWAWRKYGQFPIKGSPPRCGYKCSSTV--KGCCLARKQVERNRSDPKMFIIVTYTAENHP  
AhWRKY10 : SDVAWRKYGQFPIKGSPPRCGYKCSSTV--KGCCLARKQVERNRSDPKMFIIVTYTAENHP  
AhWRKY86 : SDVAWRKYGQFPIKGSPPRCGYKCSSTV--KGCCLARKQVERNRSDPKMFIIVTYTAENHP  
AhWRKY18 : CDVAWRKYGQFPIKGSPPRCGYKCSSTV--KGCCLARKQVERNRSDPKMFIIVTYTAENHP  
AhWRKY98 : CDVAWRKYGQFPIKGSPPRCGYKCSSTV--KGCCLARKQVERNRSDPKMFIIVTYTAENHP  
AhWRKY39 : CDVAWRKYGQFPIKGSPPRCGYKCSSTV--KGCCLARKQVERNRSDPKMFIIVTYTAENHP  
AhWRKY119 : -DVAWRKYGQFPIKGSPPRCGYKCSSTV--KGCCLARKQVERNRSDPKMFIIVTYTAENHP  
AhWRKY41 : SDVAWRKYGQFPIKGSPPRCGYKCSSTV--KGCCLARKQVERNRSDPKMFIIVTYTAENHP  
AhWRKY123 : SDVAWRKYGQFPIKGSPPRCGYKCSSTV--KGCCLARKQVERNRSDPKMFIIVTYTAENHP  
AhWRKY23 : SDVAWRKYGQFPIKGSPPRCGYKCSSTV--KGCCLARKQVERNRSDPKMFIIVTYTAENHP  
AhWRKY105 : SDVAWRKYGQFPIKGSPPRCGYKCSSTV--KGCCLARKQVERNRSDPKMFIIVTYTAENHP  
AhWRKY27 : SDVAWRKYGQFPIKGSPPRCGYKCSSTV--KGCCLARKQVERNRSDPKMFIIVTYTAENHP  
AhWRKY109 : SDVAWRKYGQFPIKGSPPRCGYKCSSTV--KGCCLARKQVERNRSDPKMFIIVTYTAENHP  
AhWRKY25 : SDVAWRKYGQFPIKGSPPRCGYKCSSTV--KGCCLARKQVERNRSDPKMFIIVTYTAENHP  
AhWRKY107 : SDVAWRKYGQFPIKGSPPRCGYKCSSTV--KGCCLARKQVERNRSDPKMFIIVTYTAENHP  
AhWRKY66 : SDVAWRKYGQFPIKGSPPRCGYKCSSTV--KGCCLARKQVERNRSDPKMFIIVTYTAENHP  
AhWRKY143 : SDVAWRKYGQFPIKGSPPRCGYKCSSTV--KGCCLARKQVERNRSDPKMFIIVTYTAENHP  
AhWRKY46 : SDVAWRKYGQFPIKGSPPRCGYKCSSTV--KGCCLARKQVERNRSDPKMFIIVTYTAENHP  
AhWRKY126 : SDVAWRKYGQFPIKGSPPRCGYKCSSTV--KGCCLARKQVERNRSDPKMFIIVTYTAENHP

Group III

AtWRKY55 : DDNHTWRKYGQFPIKGSPPRCGYKCSSTV--KGCCLARKQVERNRSDPKMFIIVTYTAENHP  
AhWRKY57 : DDNHTWRKYGQFPIKGSPPRCGYKCSSTV--KGCCLARKQVERNRSDPKMFIIVTYTAENHP  
AhWRKY141 : DDNHTWRKYGQFPIKGSPPRCGYKCSSTV--KGCCLARKQVERNRSDPKMFIIVTYTAENHP  
AhWRKY17 : DDNHTWRKYGQFPIKGSPPRCGYKCSSTV--KGCCLARKQVERNRSDPKMFIIVTYTAENHP  
AhWRKY97 : DDNHTWRKYGQFPIKGSPPRCGYKCSSTV--KGCCLARKQVERNRSDPKMFIIVTYTAENHP  
AhWRKY43 : DDNHTWRKYGQFPIKGSPPRCGYKCSSTV--KGCCLARKQVERNRSDPKMFIIVTYTAENHP  
AhWRKY129 : DDNHTWRKYGQFPIKGSPPRCGYKCSSTV--KGCCLARKQVERNRSDPKMFIIVTYTAENHP  
AhWRKY63 : DDNHTWRKYGQFPIKGSPPRCGYKCSSTV--KGCCLARKQVERNRSDPKMFIIVTYTAENHP  
AhWRKY87 : DDNHTWRKYGQFPIKGSPPRCGYKCSSTV--KGCCLARKQVERNRSDPKMFIIVTYTAENHP  
AhWRKY38 : DDNHTWRKYGQFPIKGSPPRCGYKCSSTV--KGCCLARKQVERNRSDPKMFIIVTYTAENHP  
AhWRKY120 : DDNHTWRKYGQFPIKGSPPRCGYKCSSTV--KGCCLARKQVERNRSDPKMFIIVTYTAENHP  
AhWRKY32 : DDNHTWRKYGQFPIKGSPPRCGYKCSSTV--KGCCLARKQVERNRSDPKMFIIVTYTAENHP  
AhWRKY172 : DDNHTWRKYGQFPIKGSPPRCGYKCSSTV--KGCCLARKQVERNRSDPKMFIIVTYTAENHP  
AhWRKY152 : DDNHTWRKYGQFPIKGSPPRCGYKCSSTV--KGCCLARKQVERNRSDPKMFIIVTYTAENHP  
AhWRKY88 : DDNHTWRKYGQFPIKGSPPRCGYKCSSTV--KGCCLARKQVERNRSDPKMFIIVTYTAENHP  
AhWRKY60 : DDNHTWRKYGQFPIKGSPPRCGYKCSSTV--KGCCLARKQVERNRSDPKMFIIVTYTAENHP  
AhWRKY145 : DDNHTWRKYGQFPIKGSPPRCGYKCSSTV--KGCCLARKQVERNRSDPKMFIIVTYTAENHP  
AhWRKY59 : DDNHTWRKYGQFPIKGSPPRCGYKCSSTV--KGCCLARKQVERNRSDPKMFIIVTYTAENHP  
AhWRKY146 : DDNHTWRKYGQFPIKGSPPRCGYKCSSTV--KGCCLARKQVERNRSDPKMFIIVTYTAENHP  
AhWRKY61 : DDNHTWRKYGQFPIKGSPPRCGYKCSSTV--KGCCLARKQVERNRSDPKMFIIVTYTAENHP  
AhWRKY144 : DDNHTWRKYGQFPIKGSPPRCGYKCSSTV--KGCCLARKQVERNRSDPKMFIIVTYTAENHP  
AhWRKY62 : DDNHTWRKYGQFPIKGSPPRCGYKCSSTV--KGCCLARKQVERNRSDPKMFIIVTYTAENHP  
AhWRKY58 : DDNHTWRKYGQFPIKGSPPRCGYKCSSTV--KGCCLARKQVERNRSDPKMFIIVTYTAENHP  
AhWRKY140 : DDNHTWRKYGQFPIKGSPPRCGYKCSSTV--KGCCLARKQVERNRSDPKMFIIVTYTAENHP  
AhWRKY73 : DDNHTWRKYGQFPIKGSPPRCGYKCSSTV--KGCCLARKQVERNRSDPKMFIIVTYTAENHP  
AhWRKY154 : DDNHTWRKYGQFPIKGSPPRCGYKCSSTV--KGCCLARKQVERNRSDPKMFIIVTYTAENHP  
AhWRKY71 : DDNHTWRKYGQFPIKGSPPRCGYKCSSTV--KGCCLARKQVERNRSDPKMFIIVTYTAENHP
