# Supplementary material for: Identification and expression analysis of WRKY gene family under drought stress in peanut (Arachis hypogaea L.)
Source: PLoS One. 2020 Apr 9;15(4):e0231396. doi: 10.1371/journal.pone.0231396 (PMC7144997; doi:10.1371/journal.pone.0231396)
Supplement: S5 Table — (XLSX) [file pone.0231396.s008.xlsx]

## Sheet: number
ABRE	104
ACA-motif	1	AhWRKY106
AE-box	46
AP-1	4	AhWRKY12	AhWRKY35	AhWRKY138	AhWRKY67
as-1	87
AT~ABRE	1	AhWRKY79
AT~TATA-box	152
ATC-motif	2	AhWRKY144	AhWRKY74
Box II	1	AhWRKY40
box S	7	AhWRKY32	AhWRKY104	AhWRKY82	AhWRKY72	AhWRKY52	AhWRKY150	AhWRKY152
CAAT-box	147
CAG-motif	2	AhWRKY4	AhWRKY84
CAT-box	37
DRE core	3	AhWRKY33	AhWRKY113	AhWRKY20
GA-motif	43
Gap-box	16
GATA-motif	29
G-box	71
GT1-motif	58
GTGGC-motif	1	AhWRKY102
HD-Zip 1	5	AhWRKY155	AhWRKY74	AhWRKY5	AhWRKY87	AhWRKY93
HD-Zip 3	7	AhWRKY96	AhWRKY44	AhWRKY16	AhWRKY58	AhWRKY41	AhWRKY87	AhWRKY123
MBS	33
STRE	96
TATA	129
TATA-box	158
TCT-motif	66
W box	83

## Sheet: All
S5 Table. List of the type of cis-acting elements
genes	Name of cis-elements	Initiation Position	Termination Position	Functions of the cis-elements	Classification of cis-elements
AhWRKY85	W box	255	261	elicitation; wounding and pathogen responsievness. Binds WRKY type transcription factors	Abiotic / biotic stress related elements
AhWRKY85	W box	1301	1307	elicitation; wounding and pathogen responsievness. Binds WRKY type transcription factors	Abiotic / biotic stress related elements
AhWRKY85	CAT-box	854	860	cis-acting regulatory element related to meristem expression	development-related elements
AhWRKY85	AT~TATA-box	318	324	core promotor element	promoter related elements
AhWRKY85	AT~TATA-box	378	384	core promotor element	promoter related elements
AhWRKY85	AT~TATA-box	380	386	core promotor element	promoter related elements
AhWRKY85	AT~TATA-box	382	388	core promotor element	promoter related elements
AhWRKY85	AT~TATA-box	384	390	core promotor element	promoter related elements
AhWRKY85	AT~TATA-box	386	392	core promotor element	promoter related elements
AhWRKY85	AT~TATA-box	388	394	core promotor element	promoter related elements
AhWRKY85	AT~TATA-box	390	396	core promotor element	promoter related elements
AhWRKY85	AT~TATA-box	392	398	core promotor element	promoter related elements
AhWRKY85	AT~TATA-box	394	400	core promotor element	promoter related elements
AhWRKY85	AT~TATA-box	396	402	core promotor element	promoter related elements
AhWRKY85	AT~TATA-box	398	404	core promotor element	promoter related elements
AhWRKY85	AT~TATA-box	400	406	core promotor element	promoter related elements
AhWRKY85	AT~TATA-box	402	408	core promotor element	promoter related elements
AhWRKY85	AT~TATA-box	404	410	core promotor element	promoter related elements
AhWRKY85	AT~TATA-box	406	412	core promotor element	promoter related elements
AhWRKY85	AT~TATA-box	408	414	core promotor element	promoter related elements
AhWRKY85	AT~TATA-box	410	416	core promotor element	promoter related elements
AhWRKY85	AT~TATA-box	412	418	core promotor element	promoter related elements
AhWRKY85	AT~TATA-box	414	420	core promotor element	promoter related elements
AhWRKY85	AT~TATA-box	416	422	core promotor element	promoter related elements
AhWRKY85	AT~TATA-box	868	876	core promotor element	promoter related elements
AhWRKY85	AT~TATA-box	870	876	core promotor element	promoter related elements
AhWRKY85	AT~TATA-box	1146	1154	core promotor element	promoter related elements
AhWRKY85	AT~TATA-box	1148	1154	core promotor element	promoter related elements
AhWRKY85	AT~TATA-box	1150	1156	core promotor element	promoter related elements
AhWRKY85	AT~TATA-box	1166	1172	core promotor element	promoter related elements
AhWRKY85	AT~TATA-box	1168	1174	core promotor element	promoter related elements
AhWRKY85	STRE	949	954	activation by heat shock, osmotic stress, low pH, nutrient starvation	Abiotic / biotic stress related elements
AhWRKY85	AE-box	596	604	part of a module for light response	Abiotic / biotic stress related elements
AhWRKY85	CAAT-box	706	711	common cis-acting element in promoter and enhancer regions	promoter related elements
AhWRKY85	CAAT-box	1479	1484	common cis-acting element in promoter and enhancer regions	promoter related elements
AhWRKY85	TATA	355	363	core promotor element	promoter related elements
AhWRKY85	TATA	866	874	core promotor element	promoter related elements
AhWRKY85	G-box	1287	1293	cis-acting regulatory element involved in light responsiveness	Abiotic / biotic stress related elements
AhWRKY85	TATA-box	77	82	core promoter element around -30 of transcription start	promoter related elements
AhWRKY85	TATA-box	78	82	core promoter element around -30 of transcription start	promoter related elements
AhWRKY85	TATA-box	317	324	core promoter element around -30 of transcription start	promoter related elements
AhWRKY85	TATA-box	318	324	core promoter element around -30 of transcription start	promoter related elements
AhWRKY85	TATA-box	320	324	core promoter element around -30 of transcription start	promoter related elements
AhWRKY85	TATA-box	342	346	core promoter element around -30 of transcription start	promoter related elements
AhWRKY85	TATA-box	358	363	core promoter element around -30 of transcription start	promoter related elements
AhWRKY85	TATA-box	359	363	core promoter element around -30 of transcription start	promoter related elements
AhWRKY85	TATA-box	366	371	core promoter element around -30 of transcription start	promoter related elements
AhWRKY85	TATA-box	367	371	core promoter element around -30 of transcription start	promoter related elements
AhWRKY85	TATA-box	377	384	core promoter element around -30 of transcription start	promoter related elements
AhWRKY85	TATA-box	378	384	core promoter element around -30 of transcription start	promoter related elements
AhWRKY85	TATA-box	380	386	core promoter element around -30 of transcription start	promoter related elements
AhWRKY85	TATA-box	382	388	core promoter element around -30 of transcription start	promoter related elements
AhWRKY85	TATA-box	384	390	core promoter element around -30 of transcription start	promoter related elements
AhWRKY85	TATA-box	386	392	core promoter element around -30 of transcription start	promoter related elements
AhWRKY85	TATA-box	388	394	core promoter element around -30 of transcription start	promoter related elements
AhWRKY85	TATA-box	390	396	core promoter element around -30 of transcription start	promoter related elements
AhWRKY85	TATA-box	392	398	core promoter element around -30 of transcription start	promoter related elements
AhWRKY85	TATA-box	394	400	core promoter element around -30 of transcription start	promoter related elements
AhWRKY85	TATA-box	396	402	core promoter element around -30 of transcription start	promoter related elements
AhWRKY85	TATA-box	398	404	core promoter element around -30 of transcription start	promoter related elements
AhWRKY85	TATA-box	400	406	core promoter element around -30 of transcription start	promoter related elements
AhWRKY85	TATA-box	402	408	core promoter element around -30 of transcription start	promoter related elements
AhWRKY85	TATA-box	404	410	core promoter element around -30 of transcription start	promoter related elements
AhWRKY85	TATA-box	406	412	core promoter element around -30 of transcription start	promoter related elements
AhWRKY85	TATA-box	408	414	core promoter element around -30 of transcription start	promoter related elements
AhWRKY85	TATA-box	410	416	core promoter element around -30 of transcription start	promoter related elements
AhWRKY85	TATA-box	412	418	core promoter element around -30 of transcription start	promoter related elements
AhWRKY85	TATA-box	414	420	core promoter element around -30 of transcription start	promoter related elements
AhWRKY85	TATA-box	416	422	core promoter element around -30 of transcription start	promoter related elements
AhWRKY85	TATA-box	418	422	core promoter element around -30 of transcription start	promoter related elements
AhWRKY85	TATA-box	425	435	core promoter element around -30 of transcription start	promoter related elements
AhWRKY85	TATA-box	430	435	core promoter element around -30 of transcription start	promoter related elements
AhWRKY85	TATA-box	431	435	core promoter element around -30 of transcription start	promoter related elements
AhWRKY85	TATA-box	500	504	core promoter element around -30 of transcription start	promoter related elements
AhWRKY85	TATA-box	531	536	core promoter element around -30 of transcription start	promoter related elements
AhWRKY85	TATA-box	532	536	core promoter element around -30 of transcription start	promoter related elements
AhWRKY85	TATA-box	538	542	core promoter element around -30 of transcription start	promoter related elements
AhWRKY85	TATA-box	548	553	core promoter element around -30 of transcription start	promoter related elements
AhWRKY85	TATA-box	549	553	core promoter element around -30 of transcription start	promoter related elements
AhWRKY85	TATA-box	604	608	core promoter element around -30 of transcription start	promoter related elements
AhWRKY85	TATA-box	625	630	core promoter element around -30 of transcription start	promoter related elements
AhWRKY85	TATA-box	626	630	core promoter element around -30 of transcription start	promoter related elements
AhWRKY85	TATA-box	634	638	core promoter element around -30 of transcription start	promoter related elements
AhWRKY85	TATA-box	639	644	core promoter element around -30 of transcription start	promoter related elements
AhWRKY85	TATA-box	640	644	core promoter element around -30 of transcription start	promoter related elements
AhWRKY85	TATA-box	656	661	core promoter element around -30 of transcription start	promoter related elements
AhWRKY85	TATA-box	657	661	core promoter element around -30 of transcription start	promoter related elements
AhWRKY85	TATA-box	684	688	core promoter element around -30 of transcription start	promoter related elements
AhWRKY85	TATA-box	792	796	core promoter element around -30 of transcription start	promoter related elements
AhWRKY85	TATA-box	869	876	core promoter element around -30 of transcription start	promoter related elements
AhWRKY85	TATA-box	870	876	core promoter element around -30 of transcription start	promoter related elements
AhWRKY85	TATA-box	872	876	core promoter element around -30 of transcription start	promoter related elements
AhWRKY85	TATA-box	890	894	core promoter element around -30 of transcription start	promoter related elements
AhWRKY85	TATA-box	898	902	core promoter element around -30 of transcription start	promoter related elements
AhWRKY85	TATA-box	1017	1022	core promoter element around -30 of transcription start	promoter related elements
AhWRKY85	TATA-box	1018	1022	core promoter element around -30 of transcription start	promoter related elements
AhWRKY85	TATA-box	1147	1154	core promoter element around -30 of transcription start	promoter related elements
AhWRKY85	TATA-box	1148	1154	core promoter element around -30 of transcription start	promoter related elements
AhWRKY85	TATA-box	1150	1156	core promoter element around -30 of transcription start	promoter related elements
AhWRKY85	TATA-box	1152	1156	core promoter element around -30 of transcription start	promoter related elements
AhWRKY85	TATA-box	1154	1162	core promoter element around -30 of transcription start	promoter related elements
AhWRKY85	TATA-box	1166	1172	core promoter element around -30 of transcription start	promoter related elements
AhWRKY85	TATA-box	1168	1174	core promoter element around -30 of transcription start	promoter related elements
AhWRKY85	TATA-box	1170	1174	core promoter element around -30 of transcription start	promoter related elements
AhWRKY85	TATA-box	1489	1494	core promoter element around -30 of transcription start	promoter related elements
AhWRKY85	TATA-box	1490	1494	core promoter element around -30 of transcription start	promoter related elements
AhWRKY85	ABRE	1288	1293	cis-acting element involved in the abscisic acid responsiveness	hormone related elements
AhWRKY122	CAT-box	334	340	cis-acting regulatory element related to meristem expression	development-related elements
AhWRKY122	as-1	166	171	Part of the promoter of the Arabidopsis gene encoding Pro dehydrogenase (ProDH), a mitochondrial enzyme involved in the first step of the conversion of Pro to glutamic acid.	Abiotic / biotic stress related elements
AhWRKY122	as-1	244	249	Part of the promoter of the Arabidopsis gene encoding Pro dehydrogenase (ProDH), a mitochondrial enzyme involved in the first step of the conversion of Pro to glutamic acid.	Abiotic / biotic stress related elements
AhWRKY122	AE-box	500	508	part of a module for light response	Abiotic / biotic stress related elements
AhWRKY122	AE-box	541	549	part of a module for light response	Abiotic / biotic stress related elements
AhWRKY122	W box	67	73	elicitation; wounding and pathogen responsievness. Binds WRKY type transcription factors	Abiotic / biotic stress related elements
AhWRKY122	W box	158	164	elicitation; wounding and pathogen responsievness. Binds WRKY type transcription factors	Abiotic / biotic stress related elements
AhWRKY122	AT~TATA-box	902	908	core promotor element	promoter related elements
AhWRKY122	AT~TATA-box	904	910	core promotor element	promoter related elements
AhWRKY122	STRE	1336	1341	activation by heat shock, osmotic stress, low pH, nutrient starvation	Abiotic / biotic stress related elements
AhWRKY122	CAAT-box	792	797	common cis-acting element in promoter and enhancer regions	promoter related elements
AhWRKY122	CAAT-box	864	869	common cis-acting element in promoter and enhancer regions	promoter related elements
AhWRKY122	CAAT-box	1231	1236	common cis-acting element in promoter and enhancer regions	promoter related elements
AhWRKY122	CAAT-box	1491	1496	common cis-acting element in promoter and enhancer regions	promoter related elements
AhWRKY122	TATA-box	799	803	core promoter element around -30 of transcription start	promoter related elements
AhWRKY122	TATA-box	872	876	core promoter element around -30 of transcription start	promoter related elements
AhWRKY122	TATA-box	888	896	core promoter element around -30 of transcription start	promoter related elements
AhWRKY122	TATA-box	897	901	core promoter element around -30 of transcription start	promoter related elements
AhWRKY122	TATA-box	902	908	core promoter element around -30 of transcription start	promoter related elements
AhWRKY122	TATA-box	904	910	core promoter element around -30 of transcription start	promoter related elements
AhWRKY122	TATA-box	906	910	core promoter element around -30 of transcription start	promoter related elements
AhWRKY122	TATA-box	946	950	core promoter element around -30 of transcription start	promoter related elements
AhWRKY122	TATA-box	954	958	core promoter element around -30 of transcription start	promoter related elements
AhWRKY122	TATA-box	956	964	core promoter element around -30 of transcription start	promoter related elements
AhWRKY122	TATA-box	999	1003	core promoter element around -30 of transcription start	promoter related elements
AhWRKY122	TATA-box	1303	1313	core promoter element around -30 of transcription start	promoter related elements
AhWRKY122	TATA-box	1305	1309	core promoter element around -30 of transcription start	promoter related elements
AhWRKY122	TATA-box	1321	1326	core promoter element around -30 of transcription start	promoter related elements
AhWRKY122	TATA-box	1322	1326	core promoter element around -30 of transcription start	promoter related elements
AhWRKY122	TATA-box	1331	1336	core promoter element around -30 of transcription start	promoter related elements
AhWRKY122	TATA-box	1332	1336	core promoter element around -30 of transcription start	promoter related elements
AhWRKY122	MBS	1367	1373	MYB binding site involved in drought-inducibility	Abiotic / biotic stress related elements
AhWRKY122	ABRE	154	159	cis-acting element involved in the abscisic acid responsiveness	hormone related elements
AhWRKY91	W box	271	277	elicitation; wounding and pathogen responsievness. Binds WRKY type transcription factors	Abiotic / biotic stress related elements
AhWRKY91	Gap-box	1197	1211	part of a light responsive element	Abiotic / biotic stress related elements
AhWRKY91	as-1	1210	1215	Part of the promoter of the Arabidopsis gene encoding Pro dehydrogenase (ProDH), a mitochondrial enzyme involved in the first step of the conversion of Pro to glutamic acid.	Abiotic / biotic stress related elements
AhWRKY91	AT~TATA-box	619	627	core promotor element	promoter related elements
AhWRKY91	AT~TATA-box	621	627	core promotor element	promoter related elements
AhWRKY91	AT~TATA-box	623	629	core promotor element	promoter related elements
AhWRKY91	AT~TATA-box	625	631	core promotor element	promoter related elements
AhWRKY91	AT~TATA-box	627	633	core promotor element	promoter related elements
AhWRKY91	AT~TATA-box	917	923	core promotor element	promoter related elements
AhWRKY91	AT~TATA-box	930	936	core promotor element	promoter related elements
AhWRKY91	AT~TATA-box	1032	1038	core promotor element	promoter related elements
AhWRKY91	AT~TATA-box	1034	1040	core promotor element	promoter related elements
AhWRKY91	AT~TATA-box	1036	1042	core promotor element	promoter related elements
AhWRKY91	AT~TATA-box	1038	1044	core promotor element	promoter related elements
AhWRKY91	AT~TATA-box	1040	1046	core promotor element	promoter related elements
AhWRKY91	AT~TATA-box	1119	1127	core promotor element	promoter related elements
AhWRKY91	AT~TATA-box	1121	1127	core promotor element	promoter related elements
AhWRKY91	AT~TATA-box	1123	1129	core promotor element	promoter related elements
AhWRKY91	AT~TATA-box	1125	1131	core promotor element	promoter related elements
AhWRKY91	AT~TATA-box	1127	1133	core promotor element	promoter related elements
AhWRKY91	AT~TATA-box	1129	1135	core promotor element	promoter related elements
AhWRKY91	AT~TATA-box	1131	1137	core promotor element	promoter related elements
AhWRKY91	AT~TATA-box	1133	1139	core promotor element	promoter related elements
AhWRKY91	AT~TATA-box	1135	1141	core promotor element	promoter related elements
AhWRKY91	AT~TATA-box	1137	1143	core promotor element	promoter related elements
AhWRKY91	AT~TATA-box	1139	1145	core promotor element	promoter related elements
AhWRKY91	AT~TATA-box	1141	1147	core promotor element	promoter related elements
AhWRKY91	AT~TATA-box	1143	1149	core promotor element	promoter related elements
AhWRKY91	AT~TATA-box	1145	1151	core promotor element	promoter related elements
AhWRKY91	AT~TATA-box	1147	1153	core promotor element	promoter related elements
AhWRKY91	AT~TATA-box	1149	1155	core promotor element	promoter related elements
AhWRKY91	AT~TATA-box	1151	1157	core promotor element	promoter related elements
AhWRKY91	AT~TATA-box	1153	1159	core promotor element	promoter related elements
AhWRKY91	AT~TATA-box	1155	1161	core promotor element	promoter related elements
AhWRKY91	AT~TATA-box	1241	1247	core promotor element	promoter related elements
AhWRKY91	AT~TATA-box	1243	1249	core promotor element	promoter related elements
AhWRKY91	AT~TATA-box	1350	1356	core promotor element	promoter related elements
AhWRKY91	AT~TATA-box	1352	1358	core promotor element	promoter related elements
AhWRKY91	CAAT-box	312	317	common cis-acting element in promoter and enhancer regions	promoter related elements
AhWRKY91	TATA	1117	1125	core promotor element	promoter related elements
AhWRKY91	G-box	1382	1388	cis-acting regulatory element involved in light responsiveness	Abiotic / biotic stress related elements
AhWRKY91	G-box	1402	1408	cis-acting regulatory element involved in light responsiveness	Abiotic / biotic stress related elements
AhWRKY91	GT1-motif	738	744	light responsive element	Abiotic / biotic stress related elements
AhWRKY91	TATA-box	292	296	core promoter element around -30 of transcription start	promoter related elements
AhWRKY91	TATA-box	620	627	core promoter element around -30 of transcription start	promoter related elements
AhWRKY91	TATA-box	621	627	core promoter element around -30 of transcription start	promoter related elements
AhWRKY91	TATA-box	623	629	core promoter element around -30 of transcription start	promoter related elements
AhWRKY91	TATA-box	625	631	core promoter element around -30 of transcription start	promoter related elements
AhWRKY91	TATA-box	627	633	core promoter element around -30 of transcription start	promoter related elements
AhWRKY91	TATA-box	629	633	core promoter element around -30 of transcription start	promoter related elements
AhWRKY91	TATA-box	652	656	core promoter element around -30 of transcription start	promoter related elements
AhWRKY91	TATA-box	771	776	core promoter element around -30 of transcription start	promoter related elements
AhWRKY91	TATA-box	772	776	core promoter element around -30 of transcription start	promoter related elements
AhWRKY91	TATA-box	893	897	core promoter element around -30 of transcription start	promoter related elements
AhWRKY91	TATA-box	913	923	core promoter element around -30 of transcription start	promoter related elements
AhWRKY91	TATA-box	916	923	core promoter element around -30 of transcription start	promoter related elements
AhWRKY91	TATA-box	917	923	core promoter element around -30 of transcription start	promoter related elements
AhWRKY91	TATA-box	919	923	core promoter element around -30 of transcription start	promoter related elements
AhWRKY91	TATA-box	930	936	core promoter element around -30 of transcription start	promoter related elements
AhWRKY91	TATA-box	932	936	core promoter element around -30 of transcription start	promoter related elements
AhWRKY91	TATA-box	982	992	core promoter element around -30 of transcription start	promoter related elements
AhWRKY91	TATA-box	985	990	core promoter element around -30 of transcription start	promoter related elements
AhWRKY91	TATA-box	986	990	core promoter element around -30 of transcription start	promoter related elements
AhWRKY91	TATA-box	1022	1026	core promoter element around -30 of transcription start	promoter related elements
AhWRKY91	TATA-box	1032	1038	core promoter element around -30 of transcription start	promoter related elements
AhWRKY91	TATA-box	1034	1040	core promoter element around -30 of transcription start	promoter related elements
AhWRKY91	TATA-box	1038	1044	core promoter element around -30 of transcription start	promoter related elements
AhWRKY91	TATA-box	1040	1046	core promoter element around -30 of transcription start	promoter related elements
AhWRKY91	TATA-box	1042	1046	core promoter element around -30 of transcription start	promoter related elements
AhWRKY91	TATA-box	1089	1097	core promoter element around -30 of transcription start	promoter related elements
AhWRKY91	TATA-box	1120	1127	core promoter element around -30 of transcription start	promoter related elements
AhWRKY91	TATA-box	1121	1127	core promoter element around -30 of transcription start	promoter related elements
AhWRKY91	TATA-box	1123	1129	core promoter element around -30 of transcription start	promoter related elements
AhWRKY91	TATA-box	1125	1131	core promoter element around -30 of transcription start	promoter related elements
AhWRKY91	TATA-box	1127	1133	core promoter element around -30 of transcription start	promoter related elements
AhWRKY91	TATA-box	1129	1135	core promoter element around -30 of transcription start	promoter related elements
AhWRKY91	TATA-box	1131	1137	core promoter element around -30 of transcription start	promoter related elements
AhWRKY91	TATA-box	1133	1139	core promoter element around -30 of transcription start	promoter related elements
AhWRKY91	TATA-box	1135	1141	core promoter element around -30 of transcription start	promoter related elements
AhWRKY91	TATA-box	1137	1143	core promoter element around -30 of transcription start	promoter related elements
AhWRKY91	TATA-box	1139	1145	core promoter element around -30 of transcription start	promoter related elements
AhWRKY91	TATA-box	1141	1147	core promoter element around -30 of transcription start	promoter related elements
AhWRKY91	TATA-box	1143	1149	core promoter element around -30 of transcription start	promoter related elements
AhWRKY91	TATA-box	1145	1151	core promoter element around -30 of transcription start	promoter related elements
AhWRKY91	TATA-box	1147	1153	core promoter element around -30 of transcription start	promoter related elements
AhWRKY91	TATA-box	1149	1155	core promoter element around -30 of transcription start	promoter related elements
AhWRKY91	TATA-box	1151	1157	core promoter element around -30 of transcription start	promoter related elements
AhWRKY91	TATA-box	1153	1159	core promoter element around -30 of transcription start	promoter related elements
AhWRKY91	TATA-box	1155	1161	core promoter element around -30 of transcription start	promoter related elements
AhWRKY91	TATA-box	1157	1161	core promoter element around -30 of transcription start	promoter related elements
AhWRKY91	TATA-box	1241	1247	core promoter element around -30 of transcription start	promoter related elements
AhWRKY91	TATA-box	1243	1249	core promoter element around -30 of transcription start	promoter related elements
AhWRKY91	TATA-box	1245	1249	core promoter element around -30 of transcription start	promoter related elements
AhWRKY91	TATA-box	1350	1356	core promoter element around -30 of transcription start	promoter related elements
AhWRKY91	TATA-box	1352	1358	core promoter element around -30 of transcription start	promoter related elements
AhWRKY91	TATA-box	1354	1358	core promoter element around -30 of transcription start	promoter related elements
AhWRKY91	TATA-box	1414	1418	core promoter element around -30 of transcription start	promoter related elements
AhWRKY91	TCT-motif	114	120	part of a light responsive element	Abiotic / biotic stress related elements
AhWRKY91	ABRE	1212	1217	cis-acting element involved in the abscisic acid responsiveness	hormone related elements
AhWRKY91	ABRE	1382	1387	cis-acting element involved in the abscisic acid responsiveness	hormone related elements
AhWRKY91	ABRE	1402	1408	cis-acting element involved in the abscisic acid responsiveness	hormone related elements
AhWRKY91	ABRE	1403	1408	cis-acting element involved in the abscisic acid responsiveness	hormone related elements
AhWRKY43	W box	133	139	elicitation; wounding and pathogen responsievness. Binds WRKY type transcription factors	Abiotic / biotic stress related elements
AhWRKY43	as-1	1188	1193	Part of the promoter of the Arabidopsis gene encoding Pro dehydrogenase (ProDH), a mitochondrial enzyme involved in the first step of the conversion of Pro to glutamic acid.	Abiotic / biotic stress related elements
AhWRKY43	as-1	1287	1292	Part of the promoter of the Arabidopsis gene encoding Pro dehydrogenase (ProDH), a mitochondrial enzyme involved in the first step of the conversion of Pro to glutamic acid.	Abiotic / biotic stress related elements
AhWRKY43	AT~TATA-box	544	550	core promotor element	promoter related elements
AhWRKY43	AT~TATA-box	584	592	core promotor element	promoter related elements
AhWRKY43	AT~TATA-box	586	592	core promotor element	promoter related elements
AhWRKY43	AT~TATA-box	624	632	core promotor element	promoter related elements
AhWRKY43	AT~TATA-box	626	632	core promotor element	promoter related elements
AhWRKY43	AT~TATA-box	688	696	core promotor element	promoter related elements
AhWRKY43	AT~TATA-box	690	696	core promotor element	promoter related elements
AhWRKY43	AT~TATA-box	692	698	core promotor element	promoter related elements
AhWRKY43	AT~TATA-box	694	700	core promotor element	promoter related elements
AhWRKY43	STRE	1392	1397	activation by heat shock, osmotic stress, low pH, nutrient starvation	Abiotic / biotic stress related elements
AhWRKY43	AE-box	1294	1302	part of a module for light response	Abiotic / biotic stress related elements
AhWRKY43	CAAT-box	1217	1222	common cis-acting element in promoter and enhancer regions	promoter related elements
AhWRKY43	CAAT-box	1436	1441	common cis-acting element in promoter and enhancer regions	promoter related elements
AhWRKY43	TATA	686	694	core promotor element	promoter related elements
AhWRKY43	TATA	821	829	core promotor element	promoter related elements
AhWRKY43	G-box	1418	1424	cis-acting regulatory element involved in light responsiveness	Abiotic / biotic stress related elements
AhWRKY43	TATA-box	115	120	core promoter element around -30 of transcription start	promoter related elements
AhWRKY43	TATA-box	116	120	core promoter element around -30 of transcription start	promoter related elements
AhWRKY43	TATA-box	146	151	core promoter element around -30 of transcription start	promoter related elements
AhWRKY43	TATA-box	147	151	core promoter element around -30 of transcription start	promoter related elements
AhWRKY43	TATA-box	151	156	core promoter element around -30 of transcription start	promoter related elements
AhWRKY43	TATA-box	152	156	core promoter element around -30 of transcription start	promoter related elements
AhWRKY43	TATA-box	304	308	core promoter element around -30 of transcription start	promoter related elements
AhWRKY43	TATA-box	516	520	core promoter element around -30 of transcription start	promoter related elements
AhWRKY43	TATA-box	544	550	core promoter element around -30 of transcription start	promoter related elements
AhWRKY43	TATA-box	546	550	core promoter element around -30 of transcription start	promoter related elements
AhWRKY43	TATA-box	575	583	core promoter element around -30 of transcription start	promoter related elements
AhWRKY43	TATA-box	585	592	core promoter element around -30 of transcription start	promoter related elements
AhWRKY43	TATA-box	586	592	core promoter element around -30 of transcription start	promoter related elements
AhWRKY43	TATA-box	588	592	core promoter element around -30 of transcription start	promoter related elements
AhWRKY43	TATA-box	622	632	core promoter element around -30 of transcription start	promoter related elements
AhWRKY43	TATA-box	625	632	core promoter element around -30 of transcription start	promoter related elements
AhWRKY43	TATA-box	626	632	core promoter element around -30 of transcription start	promoter related elements
AhWRKY43	TATA-box	628	632	core promoter element around -30 of transcription start	promoter related elements
AhWRKY43	TATA-box	659	664	core promoter element around -30 of transcription start	promoter related elements
AhWRKY43	TATA-box	660	664	core promoter element around -30 of transcription start	promoter related elements
AhWRKY43	TATA-box	682	687	core promoter element around -30 of transcription start	promoter related elements
AhWRKY43	TATA-box	683	687	core promoter element around -30 of transcription start	promoter related elements
AhWRKY43	TATA-box	689	696	core promoter element around -30 of transcription start	promoter related elements
AhWRKY43	TATA-box	690	696	core promoter element around -30 of transcription start	promoter related elements
AhWRKY43	TATA-box	692	698	core promoter element around -30 of transcription start	promoter related elements
AhWRKY43	TATA-box	694	700	core promoter element around -30 of transcription start	promoter related elements
AhWRKY43	TATA-box	696	700	core promoter element around -30 of transcription start	promoter related elements
AhWRKY43	TATA-box	744	748	core promoter element around -30 of transcription start	promoter related elements
AhWRKY43	TATA-box	808	812	core promoter element around -30 of transcription start	promoter related elements
AhWRKY43	TATA-box	824	829	core promoter element around -30 of transcription start	promoter related elements
AhWRKY43	TATA-box	825	829	core promoter element around -30 of transcription start	promoter related elements
AhWRKY43	TATA-box	831	841	core promoter element around -30 of transcription start	promoter related elements
AhWRKY43	TATA-box	880	885	core promoter element around -30 of transcription start	promoter related elements
AhWRKY43	TATA-box	881	885	core promoter element around -30 of transcription start	promoter related elements
AhWRKY43	TATA-box	1045	1053	core promoter element around -30 of transcription start	promoter related elements
AhWRKY43	TATA-box	1060	1064	core promoter element around -30 of transcription start	promoter related elements
AhWRKY43	TATA-box	1087	1091	core promoter element around -30 of transcription start	promoter related elements
AhWRKY43	ABRE	1419	1424	cis-acting element involved in the abscisic acid responsiveness	hormone related elements
AhWRKY128	as-1	954	959	Part of the promoter of the Arabidopsis gene encoding Pro dehydrogenase (ProDH), a mitochondrial enzyme involved in the first step of the conversion of Pro to glutamic acid.	Abiotic / biotic stress related elements
AhWRKY128	as-1	1182	1187	Part of the promoter of the Arabidopsis gene encoding Pro dehydrogenase (ProDH), a mitochondrial enzyme involved in the first step of the conversion of Pro to glutamic acid.	Abiotic / biotic stress related elements
AhWRKY128	as-1	1383	1388	Part of the promoter of the Arabidopsis gene encoding Pro dehydrogenase (ProDH), a mitochondrial enzyme involved in the first step of the conversion of Pro to glutamic acid.	Abiotic / biotic stress related elements
AhWRKY128	as-1	1386	1391	Part of the promoter of the Arabidopsis gene encoding Pro dehydrogenase (ProDH), a mitochondrial enzyme involved in the first step of the conversion of Pro to glutamic acid.	Abiotic / biotic stress related elements
AhWRKY128	TATA	654	662	core promotor element	promoter related elements
AhWRKY128	TATA	823	831	core promotor element	promoter related elements
AhWRKY128	W box	1193	1199	elicitation; wounding and pathogen responsievness. Binds WRKY type transcription factors	Abiotic / biotic stress related elements
AhWRKY128	AT~TATA-box	52	58	core promotor element	promoter related elements
AhWRKY128	AT~TATA-box	740	746	core promotor element	promoter related elements
AhWRKY128	AT~TATA-box	742	748	core promotor element	promoter related elements
AhWRKY128	AT~TATA-box	744	750	core promotor element	promoter related elements
AhWRKY128	AT~TATA-box	983	989	core promotor element	promoter related elements
AhWRKY128	AT~TATA-box	985	991	core promotor element	promoter related elements
AhWRKY128	AT~TATA-box	987	993	core promotor element	promoter related elements
AhWRKY128	AT~TATA-box	989	995	core promotor element	promoter related elements
AhWRKY128	AT~TATA-box	991	997	core promotor element	promoter related elements
AhWRKY128	AT~TATA-box	993	999	core promotor element	promoter related elements
AhWRKY128	AT~TATA-box	995	1001	core promotor element	promoter related elements
AhWRKY128	AT~TATA-box	997	1003	core promotor element	promoter related elements
AhWRKY128	AT~TATA-box	999	1005	core promotor element	promoter related elements
AhWRKY128	AT~TATA-box	1001	1007	core promotor element	promoter related elements
AhWRKY128	AT~TATA-box	1003	1009	core promotor element	promoter related elements
AhWRKY128	AT~TATA-box	1005	1011	core promotor element	promoter related elements
AhWRKY128	AT~TATA-box	1007	1013	core promotor element	promoter related elements
AhWRKY128	AT~TATA-box	1009	1015	core promotor element	promoter related elements
AhWRKY128	AT~TATA-box	1011	1017	core promotor element	promoter related elements
AhWRKY128	AT~TATA-box	1013	1019	core promotor element	promoter related elements
AhWRKY128	AT~TATA-box	1015	1021	core promotor element	promoter related elements
AhWRKY128	STRE	1201	1206	activation by heat shock, osmotic stress, low pH, nutrient starvation	Abiotic / biotic stress related elements
AhWRKY128	STRE	1209	1214	activation by heat shock, osmotic stress, low pH, nutrient starvation	Abiotic / biotic stress related elements
AhWRKY128	CAAT-box	262	267	common cis-acting element in promoter and enhancer regions	promoter related elements
AhWRKY128	CAAT-box	606	611	common cis-acting element in promoter and enhancer regions	promoter related elements
AhWRKY128	CAAT-box	793	798	common cis-acting element in promoter and enhancer regions	promoter related elements
AhWRKY128	G-box	1050	1056	cis-acting regulatory element involved in light responsiveness	Abiotic / biotic stress related elements
AhWRKY128	G-box	1215	1221	cis-acting regulatory element involved in light responsiveness	Abiotic / biotic stress related elements
AhWRKY128	G-box	1221	1227	cis-acting regulatory element involved in light responsiveness	Abiotic / biotic stress related elements
AhWRKY128	GT1-motif	463	469	light responsive element	Abiotic / biotic stress related elements
AhWRKY128	GT1-motif	789	795	light responsive element	Abiotic / biotic stress related elements
AhWRKY128	TATA-box	52	58	core promoter element around -30 of transcription start	promoter related elements
AhWRKY128	TATA-box	54	58	core promoter element around -30 of transcription start	promoter related elements
AhWRKY128	TATA-box	188	193	core promoter element around -30 of transcription start	promoter related elements
AhWRKY128	TATA-box	189	193	core promoter element around -30 of transcription start	promoter related elements
AhWRKY128	TATA-box	354	359	core promoter element around -30 of transcription start	promoter related elements
AhWRKY128	TATA-box	355	359	core promoter element around -30 of transcription start	promoter related elements
AhWRKY128	TATA-box	511	516	core promoter element around -30 of transcription start	promoter related elements
AhWRKY128	TATA-box	512	516	core promoter element around -30 of transcription start	promoter related elements
AhWRKY128	TATA-box	610	614	core promoter element around -30 of transcription start	promoter related elements
AhWRKY128	TATA-box	612	620	core promoter element around -30 of transcription start	promoter related elements
AhWRKY128	TATA-box	621	625	core promoter element around -30 of transcription start	promoter related elements
AhWRKY128	TATA-box	657	662	core promoter element around -30 of transcription start	promoter related elements
AhWRKY128	TATA-box	658	662	core promoter element around -30 of transcription start	promoter related elements
AhWRKY128	TATA-box	708	712	core promoter element around -30 of transcription start	promoter related elements
AhWRKY128	TATA-box	731	735	core promoter element around -30 of transcription start	promoter related elements
AhWRKY128	TATA-box	740	746	core promoter element around -30 of transcription start	promoter related elements
AhWRKY128	TATA-box	742	748	core promoter element around -30 of transcription start	promoter related elements
AhWRKY128	TATA-box	744	750	core promoter element around -30 of transcription start	promoter related elements
AhWRKY128	TATA-box	746	750	core promoter element around -30 of transcription start	promoter related elements
AhWRKY128	TATA-box	780	788	core promoter element around -30 of transcription start	promoter related elements
AhWRKY128	TATA-box	826	831	core promoter element around -30 of transcription start	promoter related elements
AhWRKY128	TATA-box	827	831	core promoter element around -30 of transcription start	promoter related elements
AhWRKY128	TATA-box	983	989	core promoter element around -30 of transcription start	promoter related elements
AhWRKY128	TATA-box	985	991	core promoter element around -30 of transcription start	promoter related elements
AhWRKY128	TATA-box	987	993	core promoter element around -30 of transcription start	promoter related elements
AhWRKY128	TATA-box	989	995	core promoter element around -30 of transcription start	promoter related elements
AhWRKY128	TATA-box	991	997	core promoter element around -30 of transcription start	promoter related elements
AhWRKY128	TATA-box	993	999	core promoter element around -30 of transcription start	promoter related elements
AhWRKY128	TATA-box	995	1001	core promoter element around -30 of transcription start	promoter related elements
AhWRKY128	TATA-box	997	1003	core promoter element around -30 of transcription start	promoter related elements
AhWRKY128	TATA-box	999	1005	core promoter element around -30 of transcription start	promoter related elements
AhWRKY128	TATA-box	1001	1007	core promoter element around -30 of transcription start	promoter related elements
AhWRKY128	TATA-box	1003	1009	core promoter element around -30 of transcription start	promoter related elements
AhWRKY128	TATA-box	1005	1011	core promoter element around -30 of transcription start	promoter related elements
AhWRKY128	TATA-box	1007	1013	core promoter element around -30 of transcription start	promoter related elements
AhWRKY128	TATA-box	1009	1015	core promoter element around -30 of transcription start	promoter related elements
AhWRKY128	TATA-box	1013	1019	core promoter element around -30 of transcription start	promoter related elements
AhWRKY128	TATA-box	1015	1021	core promoter element around -30 of transcription start	promoter related elements
AhWRKY128	TATA-box	1017	1021	core promoter element around -30 of transcription start	promoter related elements
AhWRKY128	TATA-box	1087	1091	core promoter element around -30 of transcription start	promoter related elements
AhWRKY128	TATA-box	1092	1097	core promoter element around -30 of transcription start	promoter related elements
AhWRKY128	TATA-box	1093	1097	core promoter element around -30 of transcription start	promoter related elements
AhWRKY128	GA-motif	55	63	part of a light responsive element	Abiotic / biotic stress related elements
AhWRKY128	TCT-motif	381	387	part of a light responsive element	Abiotic / biotic stress related elements
AhWRKY128	TCT-motif	1445	1451	part of a light responsive element	Abiotic / biotic stress related elements
AhWRKY128	ABRE	1051	1056	cis-acting element involved in the abscisic acid responsiveness	hormone related elements
AhWRKY128	ABRE	1215	1221	cis-acting element involved in the abscisic acid responsiveness	hormone related elements
AhWRKY128	ABRE	1216	1221	cis-acting element involved in the abscisic acid responsiveness	hormone related elements
AhWRKY128	ABRE	1221	1227	cis-acting element involved in the abscisic acid responsiveness	hormone related elements
AhWRKY128	ABRE	1222	1227	cis-acting element involved in the abscisic acid responsiveness	hormone related elements
AhWRKY106	Gap-box	1276	1290	part of a light responsive element	Abiotic / biotic stress related elements
AhWRKY106	as-1	85	90	Part of the promoter of the Arabidopsis gene encoding Pro dehydrogenase (ProDH), a mitochondrial enzyme involved in the first step of the conversion of Pro to glutamic acid.	Abiotic / biotic stress related elements
AhWRKY106	as-1	162	167	Part of the promoter of the Arabidopsis gene encoding Pro dehydrogenase (ProDH), a mitochondrial enzyme involved in the first step of the conversion of Pro to glutamic acid.	Abiotic / biotic stress related elements
AhWRKY106	ACA-motif	359	372	part of gapA in (gapA-CMA1) involved with light responsiveness	Abiotic / biotic stress related elements
AhWRKY106	TATA	939	947	core promotor element	promoter related elements
AhWRKY106	TATA	1143	1151	core promotor element	promoter related elements
AhWRKY106	W box	155	161	elicitation; wounding and pathogen responsievness. Binds WRKY type transcription factors	Abiotic / biotic stress related elements
AhWRKY106	W box	1412	1418	elicitation; wounding and pathogen responsievness. Binds WRKY type transcription factors	Abiotic / biotic stress related elements
AhWRKY106	AT~TATA-box	946	952	core promotor element	promoter related elements
AhWRKY106	AT~TATA-box	948	954	core promotor element	promoter related elements
AhWRKY106	AT~TATA-box	1161	1167	core promotor element	promoter related elements
AhWRKY106	AT~TATA-box	1257	1263	core promotor element	promoter related elements
AhWRKY106	AT~TATA-box	1472	1478	core promotor element	promoter related elements
AhWRKY106	AT~TATA-box	1479	1485	core promotor element	promoter related elements
AhWRKY106	STRE	692	697	activation by heat shock, osmotic stress, low pH, nutrient starvation	Abiotic / biotic stress related elements
AhWRKY106	STRE	1156	1161	activation by heat shock, osmotic stress, low pH, nutrient starvation	Abiotic / biotic stress related elements
AhWRKY106	CAAT-box	547	552	common cis-acting element in promoter and enhancer regions	promoter related elements
AhWRKY106	CAAT-box	758	763	common cis-acting element in promoter and enhancer regions	promoter related elements
AhWRKY106	G-box	137	143	cis-acting regulatory element involved in light responsiveness	Abiotic / biotic stress related elements
AhWRKY106	G-box	181	187	cis-acting regulatory element involved in light responsiveness	Abiotic / biotic stress related elements
AhWRKY106	G-box	497	503	cis-acting regulatory element involved in light responsiveness	Abiotic / biotic stress related elements
AhWRKY106	TATA-box	23	27	core promoter element around -30 of transcription start	promoter related elements
AhWRKY106	TATA-box	25	33	core promoter element around -30 of transcription start	promoter related elements
AhWRKY106	TATA-box	406	411	core promoter element around -30 of transcription start	promoter related elements
AhWRKY106	TATA-box	407	411	core promoter element around -30 of transcription start	promoter related elements
AhWRKY106	TATA-box	665	670	core promoter element around -30 of transcription start	promoter related elements
AhWRKY106	TATA-box	666	670	core promoter element around -30 of transcription start	promoter related elements
AhWRKY106	TATA-box	847	852	core promoter element around -30 of transcription start	promoter related elements
AhWRKY106	TATA-box	848	852	core promoter element around -30 of transcription start	promoter related elements
AhWRKY106	TATA-box	939	943	core promoter element around -30 of transcription start	promoter related elements
AhWRKY106	TATA-box	946	952	core promoter element around -30 of transcription start	promoter related elements
AhWRKY106	TATA-box	948	954	core promoter element around -30 of transcription start	promoter related elements
AhWRKY106	TATA-box	950	954	core promoter element around -30 of transcription start	promoter related elements
AhWRKY106	TATA-box	1040	1045	core promoter element around -30 of transcription start	promoter related elements
AhWRKY106	TATA-box	1041	1045	core promoter element around -30 of transcription start	promoter related elements
AhWRKY106	TATA-box	1071	1076	core promoter element around -30 of transcription start	promoter related elements
AhWRKY106	TATA-box	1072	1076	core promoter element around -30 of transcription start	promoter related elements
AhWRKY106	TATA-box	1146	1151	core promoter element around -30 of transcription start	promoter related elements
AhWRKY106	TATA-box	1147	1151	core promoter element around -30 of transcription start	promoter related elements
AhWRKY106	TATA-box	1161	1167	core promoter element around -30 of transcription start	promoter related elements
AhWRKY106	TATA-box	1163	1167	core promoter element around -30 of transcription start	promoter related elements
AhWRKY106	TATA-box	1181	1185	core promoter element around -30 of transcription start	promoter related elements
AhWRKY106	TATA-box	1198	1202	core promoter element around -30 of transcription start	promoter related elements
AhWRKY106	TATA-box	1257	1263	core promoter element around -30 of transcription start	promoter related elements
AhWRKY106	TATA-box	1259	1263	core promoter element around -30 of transcription start	promoter related elements
AhWRKY106	TATA-box	1318	1322	core promoter element around -30 of transcription start	promoter related elements
AhWRKY106	TATA-box	1370	1375	core promoter element around -30 of transcription start	promoter related elements
AhWRKY106	TATA-box	1371	1375	core promoter element around -30 of transcription start	promoter related elements
AhWRKY106	TATA-box	1444	1449	core promoter element around -30 of transcription start	promoter related elements
AhWRKY106	TATA-box	1445	1449	core promoter element around -30 of transcription start	promoter related elements
AhWRKY106	TATA-box	1472	1478	core promoter element around -30 of transcription start	promoter related elements
AhWRKY106	TATA-box	1474	1478	core promoter element around -30 of transcription start	promoter related elements
AhWRKY106	TATA-box	1478	1485	core promoter element around -30 of transcription start	promoter related elements
AhWRKY106	TATA-box	1479	1485	core promoter element around -30 of transcription start	promoter related elements
AhWRKY106	TATA-box	1481	1485	core promoter element around -30 of transcription start	promoter related elements
AhWRKY106	TCT-motif	500	506	part of a light responsive element	Abiotic / biotic stress related elements
AhWRKY106	ABRE	137	143	cis-acting element involved in the abscisic acid responsiveness	hormone related elements
AhWRKY106	ABRE	138	143	cis-acting element involved in the abscisic acid responsiveness	hormone related elements
AhWRKY106	ABRE	181	187	cis-acting element involved in the abscisic acid responsiveness	hormone related elements
AhWRKY106	ABRE	182	187	cis-acting element involved in the abscisic acid responsiveness	hormone related elements
AhWRKY106	ABRE	497	502	cis-acting element involved in the abscisic acid responsiveness	hormone related elements
AhWRKY57	W box	1137	1143	elicitation; wounding and pathogen responsievness. Binds WRKY type transcription factors	Abiotic / biotic stress related elements
AhWRKY57	CAT-box	375	381	cis-acting regulatory element related to meristem expression	development-related elements
AhWRKY57	as-1	256	261	Part of the promoter of the Arabidopsis gene encoding Pro dehydrogenase (ProDH), a mitochondrial enzyme involved in the first step of the conversion of Pro to glutamic acid.	Abiotic / biotic stress related elements
AhWRKY57	AT~TATA-box	874	880	core promotor element	promoter related elements
AhWRKY57	STRE	50	55	activation by heat shock, osmotic stress, low pH, nutrient starvation	Abiotic / biotic stress related elements
AhWRKY57	STRE	345	350	activation by heat shock, osmotic stress, low pH, nutrient starvation	Abiotic / biotic stress related elements
AhWRKY57	STRE	363	368	activation by heat shock, osmotic stress, low pH, nutrient starvation	Abiotic / biotic stress related elements
AhWRKY57	CAAT-box	1141	1146	common cis-acting element in promoter and enhancer regions	promoter related elements
AhWRKY57	CAAT-box	1165	1170	common cis-acting element in promoter and enhancer regions	promoter related elements
AhWRKY57	CAAT-box	1296	1301	common cis-acting element in promoter and enhancer regions	promoter related elements
AhWRKY57	CAAT-box	1340	1345	common cis-acting element in promoter and enhancer regions	promoter related elements
AhWRKY57	GATA-motif	183	194	part of a light responsive element	Abiotic / biotic stress related elements
AhWRKY57	GT1-motif	1266	1272	light responsive element	Abiotic / biotic stress related elements
AhWRKY57	TATA-box	96	101	core promoter element around -30 of transcription start	promoter related elements
AhWRKY57	TATA-box	97	101	core promoter element around -30 of transcription start	promoter related elements
AhWRKY57	TATA-box	170	174	core promoter element around -30 of transcription start	promoter related elements
AhWRKY57	TATA-box	398	402	core promoter element around -30 of transcription start	promoter related elements
AhWRKY57	TATA-box	529	533	core promoter element around -30 of transcription start	promoter related elements
AhWRKY57	TATA-box	544	548	core promoter element around -30 of transcription start	promoter related elements
AhWRKY57	TATA-box	550	554	core promoter element around -30 of transcription start	promoter related elements
AhWRKY57	TATA-box	602	606	core promoter element around -30 of transcription start	promoter related elements
AhWRKY57	TATA-box	627	637	core promoter element around -30 of transcription start	promoter related elements
AhWRKY57	TATA-box	629	633	core promoter element around -30 of transcription start	promoter related elements
AhWRKY57	TATA-box	729	733	core promoter element around -30 of transcription start	promoter related elements
AhWRKY57	TATA-box	787	792	core promoter element around -30 of transcription start	promoter related elements
AhWRKY57	TATA-box	788	792	core promoter element around -30 of transcription start	promoter related elements
AhWRKY57	TATA-box	847	852	core promoter element around -30 of transcription start	promoter related elements
AhWRKY57	TATA-box	848	852	core promoter element around -30 of transcription start	promoter related elements
AhWRKY57	TATA-box	868	873	core promoter element around -30 of transcription start	promoter related elements
AhWRKY57	TATA-box	869	873	core promoter element around -30 of transcription start	promoter related elements
AhWRKY57	TATA-box	873	880	core promoter element around -30 of transcription start	promoter related elements
AhWRKY57	TATA-box	874	880	core promoter element around -30 of transcription start	promoter related elements
AhWRKY57	TATA-box	876	880	core promoter element around -30 of transcription start	promoter related elements
AhWRKY57	TATA-box	990	994	core promoter element around -30 of transcription start	promoter related elements
AhWRKY57	TATA-box	1015	1020	core promoter element around -30 of transcription start	promoter related elements
AhWRKY57	TATA-box	1016	1020	core promoter element around -30 of transcription start	promoter related elements
AhWRKY57	TATA-box	1155	1159	core promoter element around -30 of transcription start	promoter related elements
AhWRKY57	TATA-box	1260	1264	core promoter element around -30 of transcription start	promoter related elements
AhWRKY57	TATA-box	1277	1282	core promoter element around -30 of transcription start	promoter related elements
AhWRKY57	TATA-box	1278	1282	core promoter element around -30 of transcription start	promoter related elements
AhWRKY57	TCT-motif	841	847	part of a light responsive element	Abiotic / biotic stress related elements
AhWRKY89	AT~TATA-box	3	9	core promotor element	promoter related elements
AhWRKY89	AT~TATA-box	11	17	core promotor element	promoter related elements
AhWRKY89	AT~TATA-box	139	145	core promotor element	promoter related elements
AhWRKY89	AT~TATA-box	141	147	core promotor element	promoter related elements
AhWRKY89	AT~TATA-box	143	149	core promotor element	promoter related elements
AhWRKY89	AT~TATA-box	145	151	core promotor element	promoter related elements
AhWRKY89	AT~TATA-box	1334	1340	core promotor element	promoter related elements
AhWRKY89	STRE	985	990	activation by heat shock, osmotic stress, low pH, nutrient starvation	Abiotic / biotic stress related elements
AhWRKY89	CAAT-box	679	684	common cis-acting element in promoter and enhancer regions	promoter related elements
AhWRKY89	CAAT-box	743	748	common cis-acting element in promoter and enhancer regions	promoter related elements
AhWRKY89	CAAT-box	1487	1492	common cis-acting element in promoter and enhancer regions	promoter related elements
AhWRKY89	G-box	381	387	cis-acting regulatory element involved in light responsiveness	Abiotic / biotic stress related elements
AhWRKY89	GT1-motif	177	183	light responsive element	Abiotic / biotic stress related elements
AhWRKY89	GT1-motif	1343	1349	light responsive element	Abiotic / biotic stress related elements
AhWRKY89	TATA-box	2	9	core promoter element around -30 of transcription start	promoter related elements
AhWRKY89	TATA-box	3	9	core promoter element around -30 of transcription start	promoter related elements
AhWRKY89	TATA-box	5	9	core promoter element around -30 of transcription start	promoter related elements
AhWRKY89	TATA-box	11	17	core promoter element around -30 of transcription start	promoter related elements
AhWRKY89	TATA-box	13	17	core promoter element around -30 of transcription start	promoter related elements
AhWRKY89	TATA-box	36	40	core promoter element around -30 of transcription start	promoter related elements
AhWRKY89	TATA-box	138	145	core promoter element around -30 of transcription start	promoter related elements
AhWRKY89	TATA-box	139	145	core promoter element around -30 of transcription start	promoter related elements
AhWRKY89	TATA-box	141	147	core promoter element around -30 of transcription start	promoter related elements
AhWRKY89	TATA-box	143	149	core promoter element around -30 of transcription start	promoter related elements
AhWRKY89	TATA-box	145	151	core promoter element around -30 of transcription start	promoter related elements
AhWRKY89	TATA-box	147	151	core promoter element around -30 of transcription start	promoter related elements
AhWRKY89	TATA-box	311	321	core promoter element around -30 of transcription start	promoter related elements
AhWRKY89	TATA-box	313	317	core promoter element around -30 of transcription start	promoter related elements
AhWRKY89	TATA-box	348	352	core promoter element around -30 of transcription start	promoter related elements
AhWRKY89	TATA-box	357	362	core promoter element around -30 of transcription start	promoter related elements
AhWRKY89	TATA-box	358	362	core promoter element around -30 of transcription start	promoter related elements
AhWRKY89	TATA-box	566	570	core promoter element around -30 of transcription start	promoter related elements
AhWRKY89	TATA-box	966	970	core promoter element around -30 of transcription start	promoter related elements
AhWRKY89	TATA-box	1016	1020	core promoter element around -30 of transcription start	promoter related elements
AhWRKY89	TATA-box	1026	1031	core promoter element around -30 of transcription start	promoter related elements
AhWRKY89	TATA-box	1027	1031	core promoter element around -30 of transcription start	promoter related elements
AhWRKY89	TATA-box	1225	1229	core promoter element around -30 of transcription start	promoter related elements
AhWRKY89	TATA-box	1333	1340	core promoter element around -30 of transcription start	promoter related elements
AhWRKY89	TATA-box	1334	1340	core promoter element around -30 of transcription start	promoter related elements
AhWRKY89	TATA-box	1336	1340	core promoter element around -30 of transcription start	promoter related elements
AhWRKY89	TATA-box	1476	1480	core promoter element around -30 of transcription start	promoter related elements
AhWRKY89	ABRE	382	387	cis-acting element involved in the abscisic acid responsiveness	hormone related elements
AhWRKY95	W box	784	790	elicitation; wounding and pathogen responsievness. Binds WRKY type transcription factors	Abiotic / biotic stress related elements
AhWRKY95	W box	895	901	elicitation; wounding and pathogen responsievness. Binds WRKY type transcription factors	Abiotic / biotic stress related elements
AhWRKY95	as-1	420	425	Part of the promoter of the Arabidopsis gene encoding Pro dehydrogenase (ProDH), a mitochondrial enzyme involved in the first step of the conversion of Pro to glutamic acid.	Abiotic / biotic stress related elements
AhWRKY95	AT~TATA-box	63	71	core promotor element	promoter related elements
AhWRKY95	AT~TATA-box	65	71	core promotor element	promoter related elements
AhWRKY95	AT~TATA-box	67	73	core promotor element	promoter related elements
AhWRKY95	AT~TATA-box	69	75	core promotor element	promoter related elements
AhWRKY95	AT~TATA-box	108	116	core promotor element	promoter related elements
AhWRKY95	AT~TATA-box	110	116	core promotor element	promoter related elements
AhWRKY95	AT~TATA-box	112	118	core promotor element	promoter related elements
AhWRKY95	AT~TATA-box	114	120	core promotor element	promoter related elements
AhWRKY95	AT~TATA-box	116	122	core promotor element	promoter related elements
AhWRKY95	AT~TATA-box	145	151	core promotor element	promoter related elements
AhWRKY95	AT~TATA-box	152	160	core promotor element	promoter related elements
AhWRKY95	AT~TATA-box	154	160	core promotor element	promoter related elements
AhWRKY95	AT~TATA-box	156	162	core promotor element	promoter related elements
AhWRKY95	AT~TATA-box	158	164	core promotor element	promoter related elements
AhWRKY95	AT~TATA-box	885	891	core promotor element	promoter related elements
AhWRKY95	AT~TATA-box	951	959	core promotor element	promoter related elements
AhWRKY95	AT~TATA-box	953	959	core promotor element	promoter related elements
AhWRKY95	AT~TATA-box	955	961	core promotor element	promoter related elements
AhWRKY95	AT~TATA-box	1001	1007	core promotor element	promoter related elements
AhWRKY95	AT~TATA-box	1003	1009	core promotor element	promoter related elements
AhWRKY95	AT~TATA-box	1288	1294	core promotor element	promoter related elements
AhWRKY95	STRE	314	319	activation by heat shock, osmotic stress, low pH, nutrient starvation	Abiotic / biotic stress related elements
AhWRKY95	STRE	321	326	activation by heat shock, osmotic stress, low pH, nutrient starvation	Abiotic / biotic stress related elements
AhWRKY95	CAAT-box	8	13	common cis-acting element in promoter and enhancer regions	promoter related elements
AhWRKY95	CAAT-box	670	675	common cis-acting element in promoter and enhancer regions	promoter related elements
AhWRKY95	CAAT-box	814	819	common cis-acting element in promoter and enhancer regions	promoter related elements
AhWRKY95	CAAT-box	908	913	common cis-acting element in promoter and enhancer regions	promoter related elements
AhWRKY95	TATA	150	158	core promotor element	promoter related elements
AhWRKY95	TATA-box	23	27	core promoter element around -30 of transcription start	promoter related elements
AhWRKY95	TATA-box	61	71	core promoter element around -30 of transcription start	promoter related elements
AhWRKY95	TATA-box	64	71	core promoter element around -30 of transcription start	promoter related elements
AhWRKY95	TATA-box	65	71	core promoter element around -30 of transcription start	promoter related elements
AhWRKY95	TATA-box	67	73	core promoter element around -30 of transcription start	promoter related elements
AhWRKY95	TATA-box	69	75	core promoter element around -30 of transcription start	promoter related elements
AhWRKY95	TATA-box	71	75	core promoter element around -30 of transcription start	promoter related elements
AhWRKY95	TATA-box	87	91	core promoter element around -30 of transcription start	promoter related elements
AhWRKY95	TATA-box	93	97	core promoter element around -30 of transcription start	promoter related elements
AhWRKY95	TATA-box	99	104	core promoter element around -30 of transcription start	promoter related elements
AhWRKY95	TATA-box	100	104	core promoter element around -30 of transcription start	promoter related elements
AhWRKY95	TATA-box	106	116	core promoter element around -30 of transcription start	promoter related elements
AhWRKY95	TATA-box	109	116	core promoter element around -30 of transcription start	promoter related elements
AhWRKY95	TATA-box	110	116	core promoter element around -30 of transcription start	promoter related elements
AhWRKY95	TATA-box	112	118	core promoter element around -30 of transcription start	promoter related elements
AhWRKY95	TATA-box	114	120	core promoter element around -30 of transcription start	promoter related elements
AhWRKY95	TATA-box	116	122	core promoter element around -30 of transcription start	promoter related elements
AhWRKY95	TATA-box	118	122	core promoter element around -30 of transcription start	promoter related elements
AhWRKY95	TATA-box	132	136	core promoter element around -30 of transcription start	promoter related elements
AhWRKY95	TATA-box	138	142	core promoter element around -30 of transcription start	promoter related elements
AhWRKY95	TATA-box	144	151	core promoter element around -30 of transcription start	promoter related elements
AhWRKY95	TATA-box	145	151	core promoter element around -30 of transcription start	promoter related elements
AhWRKY95	TATA-box	147	151	core promoter element around -30 of transcription start	promoter related elements
AhWRKY95	TATA-box	153	160	core promoter element around -30 of transcription start	promoter related elements
AhWRKY95	TATA-box	154	160	core promoter element around -30 of transcription start	promoter related elements
AhWRKY95	TATA-box	156	162	core promoter element around -30 of transcription start	promoter related elements
AhWRKY95	TATA-box	158	164	core promoter element around -30 of transcription start	promoter related elements
AhWRKY95	TATA-box	160	164	core promoter element around -30 of transcription start	promoter related elements
AhWRKY95	TATA-box	169	174	core promoter element around -30 of transcription start	promoter related elements
AhWRKY95	TATA-box	170	174	core promoter element around -30 of transcription start	promoter related elements
AhWRKY95	TATA-box	176	180	core promoter element around -30 of transcription start	promoter related elements
AhWRKY95	TATA-box	235	239	core promoter element around -30 of transcription start	promoter related elements
AhWRKY95	TATA-box	245	250	core promoter element around -30 of transcription start	promoter related elements
AhWRKY95	TATA-box	246	250	core promoter element around -30 of transcription start	promoter related elements
AhWRKY95	TATA-box	251	255	core promoter element around -30 of transcription start	promoter related elements
AhWRKY95	TATA-box	257	261	core promoter element around -30 of transcription start	promoter related elements
AhWRKY95	TATA-box	436	441	core promoter element around -30 of transcription start	promoter related elements
AhWRKY95	TATA-box	437	441	core promoter element around -30 of transcription start	promoter related elements
AhWRKY95	TATA-box	471	479	core promoter element around -30 of transcription start	promoter related elements
AhWRKY95	TATA-box	473	481	core promoter element around -30 of transcription start	promoter related elements
AhWRKY95	TATA-box	533	541	core promoter element around -30 of transcription start	promoter related elements
AhWRKY95	TATA-box	537	545	core promoter element around -30 of transcription start	promoter related elements
AhWRKY95	TATA-box	548	552	core promoter element around -30 of transcription start	promoter related elements
AhWRKY95	TATA-box	730	735	core promoter element around -30 of transcription start	promoter related elements
AhWRKY95	TATA-box	731	735	core promoter element around -30 of transcription start	promoter related elements
AhWRKY95	TATA-box	756	761	core promoter element around -30 of transcription start	promoter related elements
AhWRKY95	TATA-box	757	761	core promoter element around -30 of transcription start	promoter related elements
AhWRKY95	TATA-box	801	805	core promoter element around -30 of transcription start	promoter related elements
AhWRKY95	TATA-box	808	812	core promoter element around -30 of transcription start	promoter related elements
AhWRKY95	TATA-box	884	891	core promoter element around -30 of transcription start	promoter related elements
AhWRKY95	TATA-box	885	891	core promoter element around -30 of transcription start	promoter related elements
AhWRKY95	TATA-box	887	891	core promoter element around -30 of transcription start	promoter related elements
AhWRKY95	TATA-box	940	944	core promoter element around -30 of transcription start	promoter related elements
AhWRKY95	TATA-box	952	959	core promoter element around -30 of transcription start	promoter related elements
AhWRKY95	TATA-box	953	959	core promoter element around -30 of transcription start	promoter related elements
AhWRKY95	TATA-box	955	961	core promoter element around -30 of transcription start	promoter related elements
AhWRKY95	TATA-box	957	961	core promoter element around -30 of transcription start	promoter related elements
AhWRKY95	TATA-box	994	999	core promoter element around -30 of transcription start	promoter related elements
AhWRKY95	TATA-box	995	999	core promoter element around -30 of transcription start	promoter related elements
AhWRKY95	TATA-box	1000	1007	core promoter element around -30 of transcription start	promoter related elements
AhWRKY95	TATA-box	1001	1007	core promoter element around -30 of transcription start	promoter related elements
AhWRKY95	TATA-box	1003	1009	core promoter element around -30 of transcription start	promoter related elements
AhWRKY95	TATA-box	1005	1009	core promoter element around -30 of transcription start	promoter related elements
AhWRKY95	TATA-box	1084	1088	core promoter element around -30 of transcription start	promoter related elements
AhWRKY95	TATA-box	1153	1157	core promoter element around -30 of transcription start	promoter related elements
AhWRKY95	TATA-box	1288	1294	core promoter element around -30 of transcription start	promoter related elements
AhWRKY95	TATA-box	1290	1294	core promoter element around -30 of transcription start	promoter related elements
AhWRKY95	TATA-box	1400	1404	core promoter element around -30 of transcription start	promoter related elements
AhWRKY95	TATA-box	1421	1425	core promoter element around -30 of transcription start	promoter related elements
AhWRKY95	MBS	270	276	MYB binding site involved in drought-inducibility	Abiotic / biotic stress related elements
AhWRKY95	MBS	366	372	MYB binding site involved in drought-inducibility	Abiotic / biotic stress related elements
AhWRKY32	as-1	1042	1047	Part of the promoter of the Arabidopsis gene encoding Pro dehydrogenase (ProDH), a mitochondrial enzyme involved in the first step of the conversion of Pro to glutamic acid.	Abiotic / biotic stress related elements
AhWRKY32	as-1	1095	1100	Part of the promoter of the Arabidopsis gene encoding Pro dehydrogenase (ProDH), a mitochondrial enzyme involved in the first step of the conversion of Pro to glutamic acid.	Abiotic / biotic stress related elements
AhWRKY32	as-1	1109	1114	Part of the promoter of the Arabidopsis gene encoding Pro dehydrogenase (ProDH), a mitochondrial enzyme involved in the first step of the conversion of Pro to glutamic acid.	Abiotic / biotic stress related elements
AhWRKY32	AT~TATA-box	37	43	core promotor element	promoter related elements
AhWRKY32	AT~TATA-box	39	45	core promotor element	promoter related elements
AhWRKY32	AT~TATA-box	41	47	core promotor element	promoter related elements
AhWRKY32	AT~TATA-box	99	105	core promotor element	promoter related elements
AhWRKY32	AT~TATA-box	317	323	core promotor element	promoter related elements
AhWRKY32	AT~TATA-box	402	408	core promotor element	promoter related elements
AhWRKY32	AT~TATA-box	410	416	core promotor element	promoter related elements
AhWRKY32	STRE	1321	1326	activation by heat shock, osmotic stress, low pH, nutrient starvation	Abiotic / biotic stress related elements
AhWRKY32	box S	5	12	wounding and pathogen respons	Abiotic / biotic stress related elements
AhWRKY32	G-box	986	992	cis-acting regulatory element involved in light responsiveness	Abiotic / biotic stress related elements
AhWRKY32	G-box	1185	1195	cis-acting regulatory element involved in light responsiveness	Abiotic / biotic stress related elements
AhWRKY32	G-box	1187	1193	cis-acting regulatory element involved in light responsiveness	Abiotic / biotic stress related elements
AhWRKY32	GT1-motif	814	820	light responsive element	Abiotic / biotic stress related elements
AhWRKY32	GT1-motif	1135	1141	light responsive element	Abiotic / biotic stress related elements
AhWRKY32	GT1-motif	1277	1283	light responsive element	Abiotic / biotic stress related elements
AhWRKY32	TATA-box	2	6	core promoter element around -30 of transcription start	promoter related elements
AhWRKY32	TATA-box	16	20	core promoter element around -30 of transcription start	promoter related elements
AhWRKY32	TATA-box	21	26	core promoter element around -30 of transcription start	promoter related elements
AhWRKY32	TATA-box	22	26	core promoter element around -30 of transcription start	promoter related elements
AhWRKY32	TATA-box	37	43	core promoter element around -30 of transcription start	promoter related elements
AhWRKY32	TATA-box	39	45	core promoter element around -30 of transcription start	promoter related elements
AhWRKY32	TATA-box	41	47	core promoter element around -30 of transcription start	promoter related elements
AhWRKY32	TATA-box	43	47	core promoter element around -30 of transcription start	promoter related elements
AhWRKY32	TATA-box	83	87	core promoter element around -30 of transcription start	promoter related elements
AhWRKY32	TATA-box	93	98	core promoter element around -30 of transcription start	promoter related elements
AhWRKY32	TATA-box	94	98	core promoter element around -30 of transcription start	promoter related elements
AhWRKY32	TATA-box	99	105	core promoter element around -30 of transcription start	promoter related elements
AhWRKY32	TATA-box	101	105	core promoter element around -30 of transcription start	promoter related elements
AhWRKY32	TATA-box	122	127	core promoter element around -30 of transcription start	promoter related elements
AhWRKY32	TATA-box	123	127	core promoter element around -30 of transcription start	promoter related elements
AhWRKY32	TATA-box	183	187	core promoter element around -30 of transcription start	promoter related elements
AhWRKY32	TATA-box	317	323	core promoter element around -30 of transcription start	promoter related elements
AhWRKY32	TATA-box	319	323	core promoter element around -30 of transcription start	promoter related elements
AhWRKY32	TATA-box	361	366	core promoter element around -30 of transcription start	promoter related elements
AhWRKY32	TATA-box	362	366	core promoter element around -30 of transcription start	promoter related elements
AhWRKY32	TATA-box	401	408	core promoter element around -30 of transcription start	promoter related elements
AhWRKY32	TATA-box	402	408	core promoter element around -30 of transcription start	promoter related elements
AhWRKY32	TATA-box	404	408	core promoter element around -30 of transcription start	promoter related elements
AhWRKY32	TATA-box	410	416	core promoter element around -30 of transcription start	promoter related elements
AhWRKY32	TATA-box	412	416	core promoter element around -30 of transcription start	promoter related elements
AhWRKY32	TATA-box	496	501	core promoter element around -30 of transcription start	promoter related elements
AhWRKY32	TATA-box	497	501	core promoter element around -30 of transcription start	promoter related elements
AhWRKY32	TATA-box	534	539	core promoter element around -30 of transcription start	promoter related elements
AhWRKY32	TATA-box	535	539	core promoter element around -30 of transcription start	promoter related elements
AhWRKY32	TATA-box	567	572	core promoter element around -30 of transcription start	promoter related elements
AhWRKY32	TATA-box	568	572	core promoter element around -30 of transcription start	promoter related elements
AhWRKY32	TATA-box	588	593	core promoter element around -30 of transcription start	promoter related elements
AhWRKY32	TATA-box	589	593	core promoter element around -30 of transcription start	promoter related elements
AhWRKY32	TATA-box	641	645	core promoter element around -30 of transcription start	promoter related elements
AhWRKY32	TATA-box	672	677	core promoter element around -30 of transcription start	promoter related elements
AhWRKY32	TATA-box	673	677	core promoter element around -30 of transcription start	promoter related elements
AhWRKY32	TATA-box	696	704	core promoter element around -30 of transcription start	promoter related elements
AhWRKY32	TATA-box	771	779	core promoter element around -30 of transcription start	promoter related elements
AhWRKY32	TATA-box	785	790	core promoter element around -30 of transcription start	promoter related elements
AhWRKY32	TATA-box	786	790	core promoter element around -30 of transcription start	promoter related elements
AhWRKY32	TATA-box	841	845	core promoter element around -30 of transcription start	promoter related elements
AhWRKY32	TATA-box	1060	1065	core promoter element around -30 of transcription start	promoter related elements
AhWRKY32	TATA-box	1061	1065	core promoter element around -30 of transcription start	promoter related elements
AhWRKY32	TATA-box	1076	1084	core promoter element around -30 of transcription start	promoter related elements
AhWRKY32	TATA-box	1183	1187	core promoter element around -30 of transcription start	promoter related elements
AhWRKY32	TATA-box	1241	1245	core promoter element around -30 of transcription start	promoter related elements
AhWRKY32	TATA-box	1342	1347	core promoter element around -30 of transcription start	promoter related elements
AhWRKY32	TATA-box	1343	1347	core promoter element around -30 of transcription start	promoter related elements
AhWRKY32	TATA-box	1363	1367	core promoter element around -30 of transcription start	promoter related elements
AhWRKY32	TATA-box	1394	1398	core promoter element around -30 of transcription start	promoter related elements
AhWRKY32	TATA-box	1495	1499	core promoter element around -30 of transcription start	promoter related elements
AhWRKY32	MBS	1065	1071	MYB binding site involved in drought-inducibility	Abiotic / biotic stress related elements
AhWRKY32	GA-motif	312	320	part of a light responsive element	Abiotic / biotic stress related elements
AhWRKY32	TCT-motif	1127	1133	part of a light responsive element	Abiotic / biotic stress related elements
AhWRKY32	ABRE	879	886	cis-acting element involved in the abscisic acid responsiveness	hormone related elements
AhWRKY32	ABRE	987	992	cis-acting element involved in the abscisic acid responsiveness	hormone related elements
AhWRKY32	ABRE	1187	1193	cis-acting element involved in the abscisic acid responsiveness	hormone related elements
AhWRKY32	ABRE	1188	1193	cis-acting element involved in the abscisic acid responsiveness	hormone related elements
AhWRKY125	AT~TATA-box	27	33	core promotor element	promoter related elements
AhWRKY125	AT~TATA-box	914	922	core promotor element	promoter related elements
AhWRKY125	AT~TATA-box	916	922	core promotor element	promoter related elements
AhWRKY125	AT~TATA-box	958	966	core promotor element	promoter related elements
AhWRKY125	AT~TATA-box	960	966	core promotor element	promoter related elements
AhWRKY125	AT~TATA-box	1159	1165	core promotor element	promoter related elements
AhWRKY125	AT~TATA-box	1291	1297	core promotor element	promoter related elements
AhWRKY125	CAAT-box	797	802	common cis-acting element in promoter and enhancer regions	promoter related elements
AhWRKY125	CAAT-box	1193	1198	common cis-acting element in promoter and enhancer regions	promoter related elements
AhWRKY125	CAAT-box	1232	1237	common cis-acting element in promoter and enhancer regions	promoter related elements
AhWRKY125	CAAT-box	1417	1422	common cis-acting element in promoter and enhancer regions	promoter related elements
AhWRKY125	TATA	437	445	core promotor element	promoter related elements
AhWRKY125	TATA	912	920	core promotor element	promoter related elements
AhWRKY125	TATA-box	27	33	core promoter element around -30 of transcription start	promoter related elements
AhWRKY125	TATA-box	29	33	core promoter element around -30 of transcription start	promoter related elements
AhWRKY125	TATA-box	103	108	core promoter element around -30 of transcription start	promoter related elements
AhWRKY125	TATA-box	104	108	core promoter element around -30 of transcription start	promoter related elements
AhWRKY125	TATA-box	177	181	core promoter element around -30 of transcription start	promoter related elements
AhWRKY125	TATA-box	279	283	core promoter element around -30 of transcription start	promoter related elements
AhWRKY125	TATA-box	324	328	core promoter element around -30 of transcription start	promoter related elements
AhWRKY125	TATA-box	410	414	core promoter element around -30 of transcription start	promoter related elements
AhWRKY125	TATA-box	437	441	core promoter element around -30 of transcription start	promoter related elements
AhWRKY125	TATA-box	483	491	core promoter element around -30 of transcription start	promoter related elements
AhWRKY125	TATA-box	505	509	core promoter element around -30 of transcription start	promoter related elements
AhWRKY125	TATA-box	537	541	core promoter element around -30 of transcription start	promoter related elements
AhWRKY125	TATA-box	652	657	core promoter element around -30 of transcription start	promoter related elements
AhWRKY125	TATA-box	653	657	core promoter element around -30 of transcription start	promoter related elements
AhWRKY125	TATA-box	663	667	core promoter element around -30 of transcription start	promoter related elements
AhWRKY125	TATA-box	868	873	core promoter element around -30 of transcription start	promoter related elements
AhWRKY125	TATA-box	869	873	core promoter element around -30 of transcription start	promoter related elements
AhWRKY125	TATA-box	915	922	core promoter element around -30 of transcription start	promoter related elements
AhWRKY125	TATA-box	916	922	core promoter element around -30 of transcription start	promoter related elements
AhWRKY125	TATA-box	918	922	core promoter element around -30 of transcription start	promoter related elements
AhWRKY125	TATA-box	956	966	core promoter element around -30 of transcription start	promoter related elements
AhWRKY125	TATA-box	959	966	core promoter element around -30 of transcription start	promoter related elements
AhWRKY125	TATA-box	960	966	core promoter element around -30 of transcription start	promoter related elements
AhWRKY125	TATA-box	962	966	core promoter element around -30 of transcription start	promoter related elements
AhWRKY125	TATA-box	971	975	core promoter element around -30 of transcription start	promoter related elements
AhWRKY125	TATA-box	997	1001	core promoter element around -30 of transcription start	promoter related elements
AhWRKY125	TATA-box	1008	1012	core promoter element around -30 of transcription start	promoter related elements
AhWRKY125	TATA-box	1084	1088	core promoter element around -30 of transcription start	promoter related elements
AhWRKY125	TATA-box	1089	1094	core promoter element around -30 of transcription start	promoter related elements
AhWRKY125	TATA-box	1090	1094	core promoter element around -30 of transcription start	promoter related elements
AhWRKY125	TATA-box	1126	1130	core promoter element around -30 of transcription start	promoter related elements
AhWRKY125	TATA-box	1158	1165	core promoter element around -30 of transcription start	promoter related elements
AhWRKY125	TATA-box	1159	1165	core promoter element around -30 of transcription start	promoter related elements
AhWRKY125	TATA-box	1161	1165	core promoter element around -30 of transcription start	promoter related elements
AhWRKY125	TATA-box	1223	1227	core promoter element around -30 of transcription start	promoter related elements
AhWRKY125	TATA-box	1236	1240	core promoter element around -30 of transcription start	promoter related elements
AhWRKY125	TATA-box	1275	1280	core promoter element around -30 of transcription start	promoter related elements
AhWRKY125	TATA-box	1276	1280	core promoter element around -30 of transcription start	promoter related elements
AhWRKY125	TATA-box	1281	1289	core promoter element around -30 of transcription start	promoter related elements
AhWRKY125	TATA-box	1291	1297	core promoter element around -30 of transcription start	promoter related elements
AhWRKY125	TATA-box	1293	1297	core promoter element around -30 of transcription start	promoter related elements
AhWRKY125	TATA-box	1303	1307	core promoter element around -30 of transcription start	promoter related elements
AhWRKY125	TATA-box	1316	1320	core promoter element around -30 of transcription start	promoter related elements
AhWRKY125	TATA-box	1321	1326	core promoter element around -30 of transcription start	promoter related elements
AhWRKY125	TATA-box	1322	1326	core promoter element around -30 of transcription start	promoter related elements
AhWRKY125	TATA-box	1348	1353	core promoter element around -30 of transcription start	promoter related elements
AhWRKY125	TATA-box	1349	1353	core promoter element around -30 of transcription start	promoter related elements
AhWRKY125	TATA-box	1405	1410	core promoter element around -30 of transcription start	promoter related elements
AhWRKY125	TATA-box	1406	1410	core promoter element around -30 of transcription start	promoter related elements
AhWRKY33	CAT-box	620	626	cis-acting regulatory element related to meristem expression	development-related elements
AhWRKY33	AT~TATA-box	967	973	core promotor element	promoter related elements
AhWRKY33	AT~TATA-box	1000	1006	core promotor element	promoter related elements
AhWRKY33	AT~TATA-box	1009	1015	core promotor element	promoter related elements
AhWRKY33	AT~TATA-box	1060	1068	core promotor element	promoter related elements
AhWRKY33	AT~TATA-box	1062	1068	core promotor element	promoter related elements
AhWRKY33	STRE	384	389	activation by heat shock, osmotic stress, low pH, nutrient starvation	Abiotic / biotic stress related elements
AhWRKY33	STRE	434	439	activation by heat shock, osmotic stress, low pH, nutrient starvation	Abiotic / biotic stress related elements
AhWRKY33	STRE	791	796	activation by heat shock, osmotic stress, low pH, nutrient starvation	Abiotic / biotic stress related elements
AhWRKY33	DRE core	357	363	dehydration-responsive element	Abiotic / biotic stress related elements
AhWRKY33	CAAT-box	486	491	common cis-acting element in promoter and enhancer regions	promoter related elements
AhWRKY33	CAAT-box	1487	1492	common cis-acting element in promoter and enhancer regions	promoter related elements
AhWRKY33	TATA	1002	1010	core promotor element	promoter related elements
AhWRKY33	TATA	1058	1066	core promotor element	promoter related elements
AhWRKY33	TATA-box	13	18	core promoter element around -30 of transcription start	promoter related elements
AhWRKY33	TATA-box	14	18	core promoter element around -30 of transcription start	promoter related elements
AhWRKY33	TATA-box	330	335	core promoter element around -30 of transcription start	promoter related elements
AhWRKY33	TATA-box	331	335	core promoter element around -30 of transcription start	promoter related elements
AhWRKY33	TATA-box	610	615	core promoter element around -30 of transcription start	promoter related elements
AhWRKY33	TATA-box	611	615	core promoter element around -30 of transcription start	promoter related elements
AhWRKY33	TATA-box	666	671	core promoter element around -30 of transcription start	promoter related elements
AhWRKY33	TATA-box	667	671	core promoter element around -30 of transcription start	promoter related elements
AhWRKY33	TATA-box	719	723	core promoter element around -30 of transcription start	promoter related elements
AhWRKY33	TATA-box	761	765	core promoter element around -30 of transcription start	promoter related elements
AhWRKY33	TATA-box	837	842	core promoter element around -30 of transcription start	promoter related elements
AhWRKY33	TATA-box	838	842	core promoter element around -30 of transcription start	promoter related elements
AhWRKY33	TATA-box	932	936	core promoter element around -30 of transcription start	promoter related elements
AhWRKY33	TATA-box	939	947	core promoter element around -30 of transcription start	promoter related elements
AhWRKY33	TATA-box	956	960	core promoter element around -30 of transcription start	promoter related elements
AhWRKY33	TATA-box	967	973	core promoter element around -30 of transcription start	promoter related elements
AhWRKY33	TATA-box	969	973	core promoter element around -30 of transcription start	promoter related elements
AhWRKY33	TATA-box	1000	1006	core promoter element around -30 of transcription start	promoter related elements
AhWRKY33	TATA-box	1002	1006	core promoter element around -30 of transcription start	promoter related elements
AhWRKY33	TATA-box	1009	1015	core promoter element around -30 of transcription start	promoter related elements
AhWRKY33	TATA-box	1011	1015	core promoter element around -30 of transcription start	promoter related elements
AhWRKY33	TATA-box	1027	1032	core promoter element around -30 of transcription start	promoter related elements
AhWRKY33	TATA-box	1028	1032	core promoter element around -30 of transcription start	promoter related elements
AhWRKY33	TATA-box	1061	1068	core promoter element around -30 of transcription start	promoter related elements
AhWRKY33	TATA-box	1062	1068	core promoter element around -30 of transcription start	promoter related elements
AhWRKY33	TATA-box	1064	1068	core promoter element around -30 of transcription start	promoter related elements
AhWRKY33	TATA-box	1207	1212	core promoter element around -30 of transcription start	promoter related elements
AhWRKY33	TATA-box	1208	1212	core promoter element around -30 of transcription start	promoter related elements
AhWRKY33	TATA-box	1314	1319	core promoter element around -30 of transcription start	promoter related elements
AhWRKY33	TATA-box	1315	1319	core promoter element around -30 of transcription start	promoter related elements
AhWRKY33	TATA-box	1493	1497	core promoter element around -30 of transcription start	promoter related elements
AhWRKY33	TCT-motif	643	649	part of a light responsive element	Abiotic / biotic stress related elements
AhWRKY104	W box	12	18	elicitation; wounding and pathogen responsievness. Binds WRKY type transcription factors	Abiotic / biotic stress related elements
AhWRKY104	AT~TATA-box	134	140	core promotor element	promoter related elements
AhWRKY104	AT~TATA-box	136	142	core promotor element	promoter related elements
AhWRKY104	AT~TATA-box	258	264	core promotor element	promoter related elements
AhWRKY104	AT~TATA-box	589	595	core promotor element	promoter related elements
AhWRKY104	AT~TATA-box	824	830	core promotor element	promoter related elements
AhWRKY104	AT~TATA-box	826	832	core promotor element	promoter related elements
AhWRKY104	AT~TATA-box	1187	1193	core promotor element	promoter related elements
AhWRKY104	AT~TATA-box	1189	1195	core promotor element	promoter related elements
AhWRKY104	AT~TATA-box	1191	1197	core promotor element	promoter related elements
AhWRKY104	AT~TATA-box	1193	1199	core promotor element	promoter related elements
AhWRKY104	AT~TATA-box	1195	1201	core promotor element	promoter related elements
AhWRKY104	STRE	976	981	activation by heat shock, osmotic stress, low pH, nutrient starvation	Abiotic / biotic stress related elements
AhWRKY104	CAAT-box	7	12	common cis-acting element in promoter and enhancer regions	promoter related elements
AhWRKY104	CAAT-box	57	62	common cis-acting element in promoter and enhancer regions	promoter related elements
AhWRKY104	CAAT-box	200	205	common cis-acting element in promoter and enhancer regions	promoter related elements
AhWRKY104	CAAT-box	729	734	common cis-acting element in promoter and enhancer regions	promoter related elements
AhWRKY104	box S	65	72	wounding and pathogen respons	Abiotic / biotic stress related elements
AhWRKY104	GATA-motif	494	505	part of a light responsive element	Abiotic / biotic stress related elements
AhWRKY104	GT1-motif	409	415	light responsive element	Abiotic / biotic stress related elements
AhWRKY104	TATA-box	132	142	core promoter element around -30 of transcription start	promoter related elements
AhWRKY104	TATA-box	134	140	core promoter element around -30 of transcription start	promoter related elements
AhWRKY104	TATA-box	136	142	core promoter element around -30 of transcription start	promoter related elements
AhWRKY104	TATA-box	138	142	core promoter element around -30 of transcription start	promoter related elements
AhWRKY104	TATA-box	257	264	core promoter element around -30 of transcription start	promoter related elements
AhWRKY104	TATA-box	258	264	core promoter element around -30 of transcription start	promoter related elements
AhWRKY104	TATA-box	260	264	core promoter element around -30 of transcription start	promoter related elements
AhWRKY104	TATA-box	262	270	core promoter element around -30 of transcription start	promoter related elements
AhWRKY104	TATA-box	277	281	core promoter element around -30 of transcription start	promoter related elements
AhWRKY104	TATA-box	369	374	core promoter element around -30 of transcription start	promoter related elements
AhWRKY104	TATA-box	370	374	core promoter element around -30 of transcription start	promoter related elements
AhWRKY104	TATA-box	427	432	core promoter element around -30 of transcription start	promoter related elements
AhWRKY104	TATA-box	428	432	core promoter element around -30 of transcription start	promoter related elements
AhWRKY104	TATA-box	564	569	core promoter element around -30 of transcription start	promoter related elements
AhWRKY104	TATA-box	565	569	core promoter element around -30 of transcription start	promoter related elements
AhWRKY104	TATA-box	588	595	core promoter element around -30 of transcription start	promoter related elements
AhWRKY104	TATA-box	589	595	core promoter element around -30 of transcription start	promoter related elements
AhWRKY104	TATA-box	591	595	core promoter element around -30 of transcription start	promoter related elements
AhWRKY104	TATA-box	621	626	core promoter element around -30 of transcription start	promoter related elements
AhWRKY104	TATA-box	622	626	core promoter element around -30 of transcription start	promoter related elements
AhWRKY104	TATA-box	627	632	core promoter element around -30 of transcription start	promoter related elements
AhWRKY104	TATA-box	628	632	core promoter element around -30 of transcription start	promoter related elements
AhWRKY104	TATA-box	637	641	core promoter element around -30 of transcription start	promoter related elements
AhWRKY104	TATA-box	674	679	core promoter element around -30 of transcription start	promoter related elements
AhWRKY104	TATA-box	675	679	core promoter element around -30 of transcription start	promoter related elements
AhWRKY104	TATA-box	723	728	core promoter element around -30 of transcription start	promoter related elements
AhWRKY104	TATA-box	724	728	core promoter element around -30 of transcription start	promoter related elements
AhWRKY104	TATA-box	736	740	core promoter element around -30 of transcription start	promoter related elements
AhWRKY104	TATA-box	824	830	core promoter element around -30 of transcription start	promoter related elements
AhWRKY104	TATA-box	826	832	core promoter element around -30 of transcription start	promoter related elements
AhWRKY104	TATA-box	828	832	core promoter element around -30 of transcription start	promoter related elements
AhWRKY104	TATA-box	940	945	core promoter element around -30 of transcription start	promoter related elements
AhWRKY104	TATA-box	941	945	core promoter element around -30 of transcription start	promoter related elements
AhWRKY104	TATA-box	1047	1051	core promoter element around -30 of transcription start	promoter related elements
AhWRKY104	TATA-box	1061	1065	core promoter element around -30 of transcription start	promoter related elements
AhWRKY104	TATA-box	1187	1193	core promoter element around -30 of transcription start	promoter related elements
AhWRKY104	TATA-box	1189	1195	core promoter element around -30 of transcription start	promoter related elements
AhWRKY104	TATA-box	1191	1197	core promoter element around -30 of transcription start	promoter related elements
AhWRKY104	TATA-box	1193	1199	core promoter element around -30 of transcription start	promoter related elements
AhWRKY104	TATA-box	1195	1201	core promoter element around -30 of transcription start	promoter related elements
AhWRKY104	TATA-box	1197	1201	core promoter element around -30 of transcription start	promoter related elements
AhWRKY104	TATA-box	1328	1332	core promoter element around -30 of transcription start	promoter related elements
AhWRKY104	TATA-box	1333	1337	core promoter element around -30 of transcription start	promoter related elements
AhWRKY104	TATA-box	1339	1347	core promoter element around -30 of transcription start	promoter related elements
AhWRKY104	TATA-box	1484	1489	core promoter element around -30 of transcription start	promoter related elements
AhWRKY104	TATA-box	1485	1489	core promoter element around -30 of transcription start	promoter related elements
AhWRKY154	as-1	158	163	Part of the promoter of the Arabidopsis gene encoding Pro dehydrogenase (ProDH), a mitochondrial enzyme involved in the first step of the conversion of Pro to glutamic acid.	Abiotic / biotic stress related elements
AhWRKY154	as-1	169	174	Part of the promoter of the Arabidopsis gene encoding Pro dehydrogenase (ProDH), a mitochondrial enzyme involved in the first step of the conversion of Pro to glutamic acid.	Abiotic / biotic stress related elements
AhWRKY154	as-1	783	788	Part of the promoter of the Arabidopsis gene encoding Pro dehydrogenase (ProDH), a mitochondrial enzyme involved in the first step of the conversion of Pro to glutamic acid.	Abiotic / biotic stress related elements
AhWRKY154	as-1	845	850	Part of the promoter of the Arabidopsis gene encoding Pro dehydrogenase (ProDH), a mitochondrial enzyme involved in the first step of the conversion of Pro to glutamic acid.	Abiotic / biotic stress related elements
AhWRKY154	as-1	1041	1046	Part of the promoter of the Arabidopsis gene encoding Pro dehydrogenase (ProDH), a mitochondrial enzyme involved in the first step of the conversion of Pro to glutamic acid.	Abiotic / biotic stress related elements
AhWRKY154	as-1	1405	1410	Part of the promoter of the Arabidopsis gene encoding Pro dehydrogenase (ProDH), a mitochondrial enzyme involved in the first step of the conversion of Pro to glutamic acid.	Abiotic / biotic stress related elements
AhWRKY154	as-1	1430	1435	Part of the promoter of the Arabidopsis gene encoding Pro dehydrogenase (ProDH), a mitochondrial enzyme involved in the first step of the conversion of Pro to glutamic acid.	Abiotic / biotic stress related elements
AhWRKY154	TATA	949	957	core promotor element	promoter related elements
AhWRKY154	W box	1162	1168	elicitation; wounding and pathogen responsievness. Binds WRKY type transcription factors	Abiotic / biotic stress related elements
AhWRKY154	AT~TATA-box	495	501	core promotor element	promoter related elements
AhWRKY154	AT~TATA-box	1182	1190	core promotor element	promoter related elements
AhWRKY154	AT~TATA-box	1184	1190	core promotor element	promoter related elements
AhWRKY154	STRE	79	84	activation by heat shock, osmotic stress, low pH, nutrient starvation	Abiotic / biotic stress related elements
AhWRKY154	STRE	409	414	activation by heat shock, osmotic stress, low pH, nutrient starvation	Abiotic / biotic stress related elements
AhWRKY154	STRE	442	447	activation by heat shock, osmotic stress, low pH, nutrient starvation	Abiotic / biotic stress related elements
AhWRKY154	STRE	1256	1261	activation by heat shock, osmotic stress, low pH, nutrient starvation	Abiotic / biotic stress related elements
AhWRKY154	CAAT-box	424	429	common cis-acting element in promoter and enhancer regions	promoter related elements
AhWRKY154	GT1-motif	849	855	light responsive element	Abiotic / biotic stress related elements
AhWRKY154	TATA-box	494	501	core promoter element around -30 of transcription start	promoter related elements
AhWRKY154	TATA-box	495	501	core promoter element around -30 of transcription start	promoter related elements
AhWRKY154	TATA-box	497	501	core promoter element around -30 of transcription start	promoter related elements
AhWRKY154	TATA-box	580	584	core promoter element around -30 of transcription start	promoter related elements
AhWRKY154	TATA-box	618	628	core promoter element around -30 of transcription start	promoter related elements
AhWRKY154	TATA-box	621	626	core promoter element around -30 of transcription start	promoter related elements
AhWRKY154	TATA-box	622	626	core promoter element around -30 of transcription start	promoter related elements
AhWRKY154	TATA-box	952	957	core promoter element around -30 of transcription start	promoter related elements
AhWRKY154	TATA-box	953	957	core promoter element around -30 of transcription start	promoter related elements
AhWRKY154	TATA-box	1183	1190	core promoter element around -30 of transcription start	promoter related elements
AhWRKY154	TATA-box	1184	1190	core promoter element around -30 of transcription start	promoter related elements
AhWRKY154	TATA-box	1186	1190	core promoter element around -30 of transcription start	promoter related elements
AhWRKY154	TATA-box	1188	1196	core promoter element around -30 of transcription start	promoter related elements
AhWRKY154	TATA-box	1444	1449	core promoter element around -30 of transcription start	promoter related elements
AhWRKY154	TATA-box	1445	1449	core promoter element around -30 of transcription start	promoter related elements
AhWRKY154	MBS	301	307	MYB binding site involved in drought-inducibility	Abiotic / biotic stress related elements
AhWRKY154	TCT-motif	1322	1328	part of a light responsive element	Abiotic / biotic stress related elements
AhWRKY49	AT~TATA-box	19	25	core promotor element	promoter related elements
AhWRKY49	AT~TATA-box	21	27	core promotor element	promoter related elements
AhWRKY49	AT~TATA-box	286	294	core promotor element	promoter related elements
AhWRKY49	AT~TATA-box	288	294	core promotor element	promoter related elements
AhWRKY49	AT~TATA-box	290	296	core promotor element	promoter related elements
AhWRKY49	AT~TATA-box	447	453	core promotor element	promoter related elements
AhWRKY49	AT~TATA-box	596	602	core promotor element	promoter related elements
AhWRKY49	AT~TATA-box	1029	1037	core promotor element	promoter related elements
AhWRKY49	AT~TATA-box	1031	1037	core promotor element	promoter related elements
AhWRKY49	AT~TATA-box	1047	1053	core promotor element	promoter related elements
AhWRKY49	AT~TATA-box	1057	1063	core promotor element	promoter related elements
AhWRKY49	AT~TATA-box	1059	1065	core promotor element	promoter related elements
AhWRKY49	AT~TATA-box	1081	1087	core promotor element	promoter related elements
AhWRKY49	AT~TATA-box	1289	1295	core promotor element	promoter related elements
AhWRKY49	CAAT-box	1013	1018	common cis-acting element in promoter and enhancer regions	promoter related elements
AhWRKY49	TATA	598	606	core promotor element	promoter related elements
AhWRKY49	TATA	1027	1035	core promotor element	promoter related elements
AhWRKY49	G-box	1099	1105	cis-acting regulatory element involved in light responsiveness	Abiotic / biotic stress related elements
AhWRKY49	TATA-box	2	6	core promoter element around -30 of transcription start	promoter related elements
AhWRKY49	TATA-box	14	18	core promoter element around -30 of transcription start	promoter related elements
AhWRKY49	TATA-box	19	25	core promoter element around -30 of transcription start	promoter related elements
AhWRKY49	TATA-box	21	27	core promoter element around -30 of transcription start	promoter related elements
AhWRKY49	TATA-box	23	27	core promoter element around -30 of transcription start	promoter related elements
AhWRKY49	TATA-box	39	43	core promoter element around -30 of transcription start	promoter related elements
AhWRKY49	TATA-box	112	117	core promoter element around -30 of transcription start	promoter related elements
AhWRKY49	TATA-box	113	117	core promoter element around -30 of transcription start	promoter related elements
AhWRKY49	TATA-box	175	179	core promoter element around -30 of transcription start	promoter related elements
AhWRKY49	TATA-box	253	263	core promoter element around -30 of transcription start	promoter related elements
AhWRKY49	TATA-box	256	261	core promoter element around -30 of transcription start	promoter related elements
AhWRKY49	TATA-box	257	261	core promoter element around -30 of transcription start	promoter related elements
AhWRKY49	TATA-box	284	294	core promoter element around -30 of transcription start	promoter related elements
AhWRKY49	TATA-box	287	294	core promoter element around -30 of transcription start	promoter related elements
AhWRKY49	TATA-box	288	294	core promoter element around -30 of transcription start	promoter related elements
AhWRKY49	TATA-box	290	296	core promoter element around -30 of transcription start	promoter related elements
AhWRKY49	TATA-box	292	296	core promoter element around -30 of transcription start	promoter related elements
AhWRKY49	TATA-box	313	318	core promoter element around -30 of transcription start	promoter related elements
AhWRKY49	TATA-box	314	318	core promoter element around -30 of transcription start	promoter related elements
AhWRKY49	TATA-box	350	354	core promoter element around -30 of transcription start	promoter related elements
AhWRKY49	TATA-box	447	453	core promoter element around -30 of transcription start	promoter related elements
AhWRKY49	TATA-box	449	453	core promoter element around -30 of transcription start	promoter related elements
AhWRKY49	TATA-box	494	498	core promoter element around -30 of transcription start	promoter related elements
AhWRKY49	TATA-box	522	526	core promoter element around -30 of transcription start	promoter related elements
AhWRKY49	TATA-box	553	558	core promoter element around -30 of transcription start	promoter related elements
AhWRKY49	TATA-box	554	558	core promoter element around -30 of transcription start	promoter related elements
AhWRKY49	TATA-box	596	602	core promoter element around -30 of transcription start	promoter related elements
AhWRKY49	TATA-box	598	602	core promoter element around -30 of transcription start	promoter related elements
AhWRKY49	TATA-box	610	618	core promoter element around -30 of transcription start	promoter related elements
AhWRKY49	TATA-box	787	791	core promoter element around -30 of transcription start	promoter related elements
AhWRKY49	TATA-box	1030	1037	core promoter element around -30 of transcription start	promoter related elements
AhWRKY49	TATA-box	1031	1037	core promoter element around -30 of transcription start	promoter related elements
AhWRKY49	TATA-box	1033	1037	core promoter element around -30 of transcription start	promoter related elements
AhWRKY49	TATA-box	1046	1053	core promoter element around -30 of transcription start	promoter related elements
AhWRKY49	TATA-box	1047	1053	core promoter element around -30 of transcription start	promoter related elements
AhWRKY49	TATA-box	1049	1053	core promoter element around -30 of transcription start	promoter related elements
AhWRKY49	TATA-box	1057	1063	core promoter element around -30 of transcription start	promoter related elements
AhWRKY49	TATA-box	1059	1065	core promoter element around -30 of transcription start	promoter related elements
AhWRKY49	TATA-box	1061	1065	core promoter element around -30 of transcription start	promoter related elements
AhWRKY49	TATA-box	1081	1087	core promoter element around -30 of transcription start	promoter related elements
AhWRKY49	TATA-box	1083	1087	core promoter element around -30 of transcription start	promoter related elements
AhWRKY49	TATA-box	1088	1093	core promoter element around -30 of transcription start	promoter related elements
AhWRKY49	TATA-box	1089	1093	core promoter element around -30 of transcription start	promoter related elements
AhWRKY49	TATA-box	1134	1138	core promoter element around -30 of transcription start	promoter related elements
AhWRKY49	TATA-box	1152	1157	core promoter element around -30 of transcription start	promoter related elements
AhWRKY49	TATA-box	1153	1157	core promoter element around -30 of transcription start	promoter related elements
AhWRKY49	TATA-box	1169	1174	core promoter element around -30 of transcription start	promoter related elements
AhWRKY49	TATA-box	1170	1174	core promoter element around -30 of transcription start	promoter related elements
AhWRKY49	TATA-box	1289	1295	core promoter element around -30 of transcription start	promoter related elements
AhWRKY49	TATA-box	1291	1295	core promoter element around -30 of transcription start	promoter related elements
AhWRKY49	TATA-box	1324	1332	core promoter element around -30 of transcription start	promoter related elements
AhWRKY49	TATA-box	1434	1439	core promoter element around -30 of transcription start	promoter related elements
AhWRKY49	TATA-box	1435	1439	core promoter element around -30 of transcription start	promoter related elements
AhWRKY49	TATA-box	1444	1452	core promoter element around -30 of transcription start	promoter related elements
AhWRKY49	TATA-box	1460	1468	core promoter element around -30 of transcription start	promoter related elements
AhWRKY49	TATA-box	1462	1470	core promoter element around -30 of transcription start	promoter related elements
AhWRKY49	TCT-motif	190	196	part of a light responsive element	Abiotic / biotic stress related elements
AhWRKY49	ABRE	1099	1104	cis-acting element involved in the abscisic acid responsiveness	hormone related elements
AhWRKY28	W box	697	703	elicitation; wounding and pathogen responsievness. Binds WRKY type transcription factors	Abiotic / biotic stress related elements
AhWRKY28	AT~TATA-box	553	559	core promotor element	promoter related elements
AhWRKY28	AT~TATA-box	555	561	core promotor element	promoter related elements
AhWRKY28	AT~TATA-box	557	563	core promotor element	promoter related elements
AhWRKY28	AT~TATA-box	559	565	core promotor element	promoter related elements
AhWRKY28	AT~TATA-box	561	567	core promotor element	promoter related elements
AhWRKY28	AT~TATA-box	563	569	core promotor element	promoter related elements
AhWRKY28	AT~TATA-box	565	571	core promotor element	promoter related elements
AhWRKY28	AT~TATA-box	567	573	core promotor element	promoter related elements
AhWRKY28	AT~TATA-box	569	575	core promotor element	promoter related elements
AhWRKY28	AT~TATA-box	571	577	core promotor element	promoter related elements
AhWRKY28	AT~TATA-box	573	579	core promotor element	promoter related elements
AhWRKY28	AT~TATA-box	575	581	core promotor element	promoter related elements
AhWRKY28	AT~TATA-box	830	836	core promotor element	promoter related elements
AhWRKY28	AT~TATA-box	832	838	core promotor element	promoter related elements
AhWRKY28	AT~TATA-box	834	840	core promotor element	promoter related elements
AhWRKY28	AT~TATA-box	836	842	core promotor element	promoter related elements
AhWRKY28	AT~TATA-box	838	844	core promotor element	promoter related elements
AhWRKY28	AT~TATA-box	840	846	core promotor element	promoter related elements
AhWRKY28	AT~TATA-box	842	848	core promotor element	promoter related elements
AhWRKY28	AT~TATA-box	844	850	core promotor element	promoter related elements
AhWRKY28	AT~TATA-box	846	852	core promotor element	promoter related elements
AhWRKY28	AT~TATA-box	848	854	core promotor element	promoter related elements
AhWRKY28	AT~TATA-box	850	856	core promotor element	promoter related elements
AhWRKY28	AT~TATA-box	852	858	core promotor element	promoter related elements
AhWRKY28	AT~TATA-box	854	860	core promotor element	promoter related elements
AhWRKY28	AT~TATA-box	856	862	core promotor element	promoter related elements
AhWRKY28	AT~TATA-box	858	864	core promotor element	promoter related elements
AhWRKY28	AT~TATA-box	860	866	core promotor element	promoter related elements
AhWRKY28	TATA	187	195	core promotor element	promoter related elements
AhWRKY28	TATA	334	342	core promotor element	promoter related elements
AhWRKY28	TATA	392	400	core promotor element	promoter related elements
AhWRKY28	TATA	510	518	core promotor element	promoter related elements
AhWRKY28	TATA	577	585	core promotor element	promoter related elements
AhWRKY28	G-box	436	442	cis-acting regulatory element involved in light responsiveness	Abiotic / biotic stress related elements
AhWRKY28	TATA-box	66	70	core promoter element around -30 of transcription start	promoter related elements
AhWRKY28	TATA-box	152	156	core promoter element around -30 of transcription start	promoter related elements
AhWRKY28	TATA-box	190	195	core promoter element around -30 of transcription start	promoter related elements
AhWRKY28	TATA-box	191	195	core promoter element around -30 of transcription start	promoter related elements
AhWRKY28	TATA-box	250	254	core promoter element around -30 of transcription start	promoter related elements
AhWRKY28	TATA-box	280	285	core promoter element around -30 of transcription start	promoter related elements
AhWRKY28	TATA-box	281	285	core promoter element around -30 of transcription start	promoter related elements
AhWRKY28	TATA-box	323	327	core promoter element around -30 of transcription start	promoter related elements
AhWRKY28	TATA-box	337	342	core promoter element around -30 of transcription start	promoter related elements
AhWRKY28	TATA-box	338	342	core promoter element around -30 of transcription start	promoter related elements
AhWRKY28	TATA-box	344	352	core promoter element around -30 of transcription start	promoter related elements
AhWRKY28	TATA-box	350	354	core promoter element around -30 of transcription start	promoter related elements
AhWRKY28	TATA-box	373	377	core promoter element around -30 of transcription start	promoter related elements
AhWRKY28	TATA-box	378	383	core promoter element around -30 of transcription start	promoter related elements
AhWRKY28	TATA-box	379	383	core promoter element around -30 of transcription start	promoter related elements
AhWRKY28	TATA-box	395	400	core promoter element around -30 of transcription start	promoter related elements
AhWRKY28	TATA-box	396	400	core promoter element around -30 of transcription start	promoter related elements
AhWRKY28	TATA-box	444	454	core promoter element around -30 of transcription start	promoter related elements
AhWRKY28	TATA-box	450	454	core promoter element around -30 of transcription start	promoter related elements
AhWRKY28	TATA-box	470	474	core promoter element around -30 of transcription start	promoter related elements
AhWRKY28	TATA-box	513	518	core promoter element around -30 of transcription start	promoter related elements
AhWRKY28	TATA-box	514	518	core promoter element around -30 of transcription start	promoter related elements
AhWRKY28	TATA-box	525	529	core promoter element around -30 of transcription start	promoter related elements
AhWRKY28	TATA-box	553	559	core promoter element around -30 of transcription start	promoter related elements
AhWRKY28	TATA-box	555	561	core promoter element around -30 of transcription start	promoter related elements
AhWRKY28	TATA-box	557	563	core promoter element around -30 of transcription start	promoter related elements
AhWRKY28	TATA-box	559	565	core promoter element around -30 of transcription start	promoter related elements
AhWRKY28	TATA-box	561	567	core promoter element around -30 of transcription start	promoter related elements
AhWRKY28	TATA-box	563	569	core promoter element around -30 of transcription start	promoter related elements
AhWRKY28	TATA-box	565	571	core promoter element around -30 of transcription start	promoter related elements
AhWRKY28	TATA-box	567	573	core promoter element around -30 of transcription start	promoter related elements
AhWRKY28	TATA-box	569	575	core promoter element around -30 of transcription start	promoter related elements
AhWRKY28	TATA-box	571	577	core promoter element around -30 of transcription start	promoter related elements
AhWRKY28	TATA-box	573	579	core promoter element around -30 of transcription start	promoter related elements
AhWRKY28	TATA-box	575	581	core promoter element around -30 of transcription start	promoter related elements
AhWRKY28	TATA-box	577	581	core promoter element around -30 of transcription start	promoter related elements
AhWRKY28	TATA-box	613	618	core promoter element around -30 of transcription start	promoter related elements
AhWRKY28	TATA-box	614	618	core promoter element around -30 of transcription start	promoter related elements
AhWRKY28	TATA-box	620	624	core promoter element around -30 of transcription start	promoter related elements
AhWRKY28	TATA-box	650	654	core promoter element around -30 of transcription start	promoter related elements
AhWRKY28	TATA-box	741	745	core promoter element around -30 of transcription start	promoter related elements
AhWRKY28	TATA-box	754	762	core promoter element around -30 of transcription start	promoter related elements
AhWRKY28	TATA-box	812	816	core promoter element around -30 of transcription start	promoter related elements
AhWRKY28	TATA-box	828	838	core promoter element around -30 of transcription start	promoter related elements
AhWRKY28	TATA-box	830	836	core promoter element around -30 of transcription start	promoter related elements
AhWRKY28	TATA-box	832	838	core promoter element around -30 of transcription start	promoter related elements
AhWRKY28	TATA-box	834	840	core promoter element around -30 of transcription start	promoter related elements
AhWRKY28	TATA-box	836	842	core promoter element around -30 of transcription start	promoter related elements
AhWRKY28	TATA-box	838	844	core promoter element around -30 of transcription start	promoter related elements
AhWRKY28	TATA-box	840	846	core promoter element around -30 of transcription start	promoter related elements
AhWRKY28	TATA-box	842	848	core promoter element around -30 of transcription start	promoter related elements
AhWRKY28	TATA-box	844	850	core promoter element around -30 of transcription start	promoter related elements
AhWRKY28	TATA-box	846	852	core promoter element around -30 of transcription start	promoter related elements
AhWRKY28	TATA-box	848	854	core promoter element around -30 of transcription start	promoter related elements
AhWRKY28	TATA-box	850	856	core promoter element around -30 of transcription start	promoter related elements
AhWRKY28	TATA-box	852	858	core promoter element around -30 of transcription start	promoter related elements
AhWRKY28	TATA-box	854	860	core promoter element around -30 of transcription start	promoter related elements
AhWRKY28	TATA-box	856	862	core promoter element around -30 of transcription start	promoter related elements
AhWRKY28	TATA-box	858	864	core promoter element around -30 of transcription start	promoter related elements
AhWRKY28	TATA-box	860	866	core promoter element around -30 of transcription start	promoter related elements
AhWRKY28	TATA-box	862	866	core promoter element around -30 of transcription start	promoter related elements
AhWRKY28	TATA-box	874	878	core promoter element around -30 of transcription start	promoter related elements
AhWRKY28	TATA-box	984	989	core promoter element around -30 of transcription start	promoter related elements
AhWRKY28	TATA-box	985	989	core promoter element around -30 of transcription start	promoter related elements
AhWRKY28	TATA-box	1062	1067	core promoter element around -30 of transcription start	promoter related elements
AhWRKY28	TATA-box	1063	1067	core promoter element around -30 of transcription start	promoter related elements
AhWRKY28	TATA-box	1084	1089	core promoter element around -30 of transcription start	promoter related elements
AhWRKY28	TATA-box	1085	1089	core promoter element around -30 of transcription start	promoter related elements
AhWRKY28	TATA-box	1164	1169	core promoter element around -30 of transcription start	promoter related elements
AhWRKY28	TATA-box	1165	1169	core promoter element around -30 of transcription start	promoter related elements
AhWRKY28	TATA-box	1299	1304	core promoter element around -30 of transcription start	promoter related elements
AhWRKY28	TATA-box	1300	1304	core promoter element around -30 of transcription start	promoter related elements
AhWRKY28	TATA-box	1414	1424	core promoter element around -30 of transcription start	promoter related elements
AhWRKY28	GA-motif	454	462	part of a light responsive element	Abiotic / biotic stress related elements
AhWRKY28	ABRE	436	441	cis-acting element involved in the abscisic acid responsiveness	hormone related elements
AhWRKY116	W box	1285	1291	elicitation; wounding and pathogen responsievness. Binds WRKY type transcription factors	Abiotic / biotic stress related elements
AhWRKY116	AT~TATA-box	331	337	core promotor element	promoter related elements
AhWRKY116	AT~TATA-box	425	431	core promotor element	promoter related elements
AhWRKY116	AT~TATA-box	427	433	core promotor element	promoter related elements
AhWRKY116	AT~TATA-box	563	569	core promotor element	promoter related elements
AhWRKY116	AT~TATA-box	618	624	core promotor element	promoter related elements
AhWRKY116	AT~TATA-box	753	761	core promotor element	promoter related elements
AhWRKY116	AT~TATA-box	755	761	core promotor element	promoter related elements
AhWRKY116	AT~TATA-box	937	943	core promotor element	promoter related elements
AhWRKY116	AT~TATA-box	939	945	core promotor element	promoter related elements
AhWRKY116	AT~TATA-box	941	947	core promotor element	promoter related elements
AhWRKY116	AT~TATA-box	1321	1329	core promotor element	promoter related elements
AhWRKY116	AT~TATA-box	1323	1329	core promotor element	promoter related elements
AhWRKY116	AT~TATA-box	1442	1448	core promotor element	promoter related elements
AhWRKY116	AT~TATA-box	1475	1481	core promotor element	promoter related elements
AhWRKY116	AT~TATA-box	1477	1483	core promotor element	promoter related elements
AhWRKY116	AT~TATA-box	1479	1485	core promotor element	promoter related elements
AhWRKY116	AT~TATA-box	1481	1487	core promotor element	promoter related elements
AhWRKY116	CAAT-box	724	729	common cis-acting element in promoter and enhancer regions	promoter related elements
AhWRKY116	TATA	943	951	core promotor element	promoter related elements
AhWRKY116	TATA	1319	1327	core promotor element	promoter related elements
AhWRKY116	GT1-motif	9	15	light responsive element	Abiotic / biotic stress related elements
AhWRKY116	TATA-box	34	38	core promoter element around -30 of transcription start	promoter related elements
AhWRKY116	TATA-box	83	88	core promoter element around -30 of transcription start	promoter related elements
AhWRKY116	TATA-box	84	88	core promoter element around -30 of transcription start	promoter related elements
AhWRKY116	TATA-box	172	176	core promoter element around -30 of transcription start	promoter related elements
AhWRKY116	TATA-box	331	337	core promoter element around -30 of transcription start	promoter related elements
AhWRKY116	TATA-box	333	337	core promoter element around -30 of transcription start	promoter related elements
AhWRKY116	TATA-box	356	360	core promoter element around -30 of transcription start	promoter related elements
AhWRKY116	TATA-box	395	405	core promoter element around -30 of transcription start	promoter related elements
AhWRKY116	TATA-box	397	401	core promoter element around -30 of transcription start	promoter related elements
AhWRKY116	TATA-box	423	433	core promoter element around -30 of transcription start	promoter related elements
AhWRKY116	TATA-box	425	431	core promoter element around -30 of transcription start	promoter related elements
AhWRKY116	TATA-box	427	433	core promoter element around -30 of transcription start	promoter related elements
AhWRKY116	TATA-box	429	433	core promoter element around -30 of transcription start	promoter related elements
AhWRKY116	TATA-box	502	507	core promoter element around -30 of transcription start	promoter related elements
AhWRKY116	TATA-box	503	507	core promoter element around -30 of transcription start	promoter related elements
AhWRKY116	TATA-box	563	569	core promoter element around -30 of transcription start	promoter related elements
AhWRKY116	TATA-box	565	569	core promoter element around -30 of transcription start	promoter related elements
AhWRKY116	TATA-box	618	624	core promoter element around -30 of transcription start	promoter related elements
AhWRKY116	TATA-box	620	624	core promoter element around -30 of transcription start	promoter related elements
AhWRKY116	TATA-box	660	665	core promoter element around -30 of transcription start	promoter related elements
AhWRKY116	TATA-box	661	665	core promoter element around -30 of transcription start	promoter related elements
AhWRKY116	TATA-box	695	699	core promoter element around -30 of transcription start	promoter related elements
AhWRKY116	TATA-box	729	733	core promoter element around -30 of transcription start	promoter related elements
AhWRKY116	TATA-box	754	761	core promoter element around -30 of transcription start	promoter related elements
AhWRKY116	TATA-box	755	761	core promoter element around -30 of transcription start	promoter related elements
AhWRKY116	TATA-box	757	761	core promoter element around -30 of transcription start	promoter related elements
AhWRKY116	TATA-box	817	825	core promoter element around -30 of transcription start	promoter related elements
AhWRKY116	TATA-box	937	943	core promoter element around -30 of transcription start	promoter related elements
AhWRKY116	TATA-box	939	945	core promoter element around -30 of transcription start	promoter related elements
AhWRKY116	TATA-box	941	947	core promoter element around -30 of transcription start	promoter related elements
AhWRKY116	TATA-box	943	947	core promoter element around -30 of transcription start	promoter related elements
AhWRKY116	TATA-box	964	969	core promoter element around -30 of transcription start	promoter related elements
AhWRKY116	TATA-box	965	969	core promoter element around -30 of transcription start	promoter related elements
AhWRKY116	TATA-box	1075	1079	core promoter element around -30 of transcription start	promoter related elements
AhWRKY116	TATA-box	1093	1101	core promoter element around -30 of transcription start	promoter related elements
AhWRKY116	TATA-box	1273	1278	core promoter element around -30 of transcription start	promoter related elements
AhWRKY116	TATA-box	1274	1278	core promoter element around -30 of transcription start	promoter related elements
AhWRKY116	TATA-box	1322	1329	core promoter element around -30 of transcription start	promoter related elements
AhWRKY116	TATA-box	1323	1329	core promoter element around -30 of transcription start	promoter related elements
AhWRKY116	TATA-box	1325	1329	core promoter element around -30 of transcription start	promoter related elements
AhWRKY116	TATA-box	1441	1448	core promoter element around -30 of transcription start	promoter related elements
AhWRKY116	TATA-box	1442	1448	core promoter element around -30 of transcription start	promoter related elements
AhWRKY116	TATA-box	1444	1448	core promoter element around -30 of transcription start	promoter related elements
AhWRKY116	TATA-box	1474	1481	core promoter element around -30 of transcription start	promoter related elements
AhWRKY116	TATA-box	1475	1481	core promoter element around -30 of transcription start	promoter related elements
AhWRKY116	TATA-box	1477	1483	core promoter element around -30 of transcription start	promoter related elements
AhWRKY116	TATA-box	1479	1485	core promoter element around -30 of transcription start	promoter related elements
AhWRKY116	TATA-box	1481	1487	core promoter element around -30 of transcription start	promoter related elements
AhWRKY116	TATA-box	1483	1487	core promoter element around -30 of transcription start	promoter related elements
AhWRKY116	ABRE	14	19	cis-acting element involved in the abscisic acid responsiveness	hormone related elements
AhWRKY94	W box	696	702	elicitation; wounding and pathogen responsievness. Binds WRKY type transcription factors	Abiotic / biotic stress related elements
AhWRKY94	AT~TATA-box	92	98	core promotor element	promoter related elements
AhWRKY94	AT~TATA-box	94	100	core promotor element	promoter related elements
AhWRKY94	AT~TATA-box	129	135	core promotor element	promoter related elements
AhWRKY94	AT~TATA-box	180	186	core promotor element	promoter related elements
AhWRKY94	AT~TATA-box	1072	1078	core promotor element	promoter related elements
AhWRKY94	STRE	1434	1439	activation by heat shock, osmotic stress, low pH, nutrient starvation	Abiotic / biotic stress related elements
AhWRKY94	CAAT-box	537	542	common cis-acting element in promoter and enhancer regions	promoter related elements
AhWRKY94	TATA	614	622	core promotor element	promoter related elements
AhWRKY94	GATA-motif	230	237	part of a light responsive element	Abiotic / biotic stress related elements
AhWRKY94	G-box	933	939	cis-acting regulatory element involved in light responsiveness	Abiotic / biotic stress related elements
AhWRKY94	TATA-box	36	40	core promoter element around -30 of transcription start	promoter related elements
AhWRKY94	TATA-box	71	76	core promoter element around -30 of transcription start	promoter related elements
AhWRKY94	TATA-box	72	76	core promoter element around -30 of transcription start	promoter related elements
AhWRKY94	TATA-box	92	98	core promoter element around -30 of transcription start	promoter related elements
AhWRKY94	TATA-box	94	100	core promoter element around -30 of transcription start	promoter related elements
AhWRKY94	TATA-box	96	100	core promoter element around -30 of transcription start	promoter related elements
AhWRKY94	TATA-box	106	111	core promoter element around -30 of transcription start	promoter related elements
AhWRKY94	TATA-box	107	111	core promoter element around -30 of transcription start	promoter related elements
AhWRKY94	TATA-box	129	135	core promoter element around -30 of transcription start	promoter related elements
AhWRKY94	TATA-box	131	135	core promoter element around -30 of transcription start	promoter related elements
AhWRKY94	TATA-box	180	186	core promoter element around -30 of transcription start	promoter related elements
AhWRKY94	TATA-box	182	186	core promoter element around -30 of transcription start	promoter related elements
AhWRKY94	TATA-box	194	198	core promoter element around -30 of transcription start	promoter related elements
AhWRKY94	TATA-box	383	388	core promoter element around -30 of transcription start	promoter related elements
AhWRKY94	TATA-box	384	388	core promoter element around -30 of transcription start	promoter related elements
AhWRKY94	TATA-box	417	422	core promoter element around -30 of transcription start	promoter related elements
AhWRKY94	TATA-box	418	422	core promoter element around -30 of transcription start	promoter related elements
AhWRKY94	TATA-box	614	618	core promoter element around -30 of transcription start	promoter related elements
AhWRKY94	TATA-box	633	637	core promoter element around -30 of transcription start	promoter related elements
AhWRKY94	TATA-box	660	665	core promoter element around -30 of transcription start	promoter related elements
AhWRKY94	TATA-box	661	665	core promoter element around -30 of transcription start	promoter related elements
AhWRKY94	TATA-box	710	714	core promoter element around -30 of transcription start	promoter related elements
AhWRKY94	TATA-box	737	747	core promoter element around -30 of transcription start	promoter related elements
AhWRKY94	TATA-box	739	743	core promoter element around -30 of transcription start	promoter related elements
AhWRKY94	TATA-box	855	859	core promoter element around -30 of transcription start	promoter related elements
AhWRKY94	TATA-box	1071	1078	core promoter element around -30 of transcription start	promoter related elements
AhWRKY94	TATA-box	1072	1078	core promoter element around -30 of transcription start	promoter related elements
AhWRKY94	TATA-box	1074	1078	core promoter element around -30 of transcription start	promoter related elements
AhWRKY94	TATA-box	1154	1158	core promoter element around -30 of transcription start	promoter related elements
AhWRKY94	TATA-box	1447	1455	core promoter element around -30 of transcription start	promoter related elements
AhWRKY94	GA-motif	161	169	part of a light responsive element	Abiotic / biotic stress related elements
AhWRKY94	ABRE	934	939	cis-acting element involved in the abscisic acid responsiveness	hormone related elements
AhWRKY96	as-1	318	323	Part of the promoter of the Arabidopsis gene encoding Pro dehydrogenase (ProDH), a mitochondrial enzyme involved in the first step of the conversion of Pro to glutamic acid.	Abiotic / biotic stress related elements
AhWRKY96	HD-Zip 3	1062	1077	protein binding site	site-binding related elements
AhWRKY96	TATA	671	679	core promotor element	promoter related elements
AhWRKY96	TATA	1451	1459	core promotor element	promoter related elements
AhWRKY96	W box	359	365	elicitation; wounding and pathogen responsievness. Binds WRKY type transcription factors	Abiotic / biotic stress related elements
AhWRKY96	AT~TATA-box	273	279	core promotor element	promoter related elements
AhWRKY96	AT~TATA-box	1464	1470	core promotor element	promoter related elements
AhWRKY96	AT~TATA-box	1481	1489	core promotor element	promoter related elements
AhWRKY96	AT~TATA-box	1483	1489	core promotor element	promoter related elements
AhWRKY96	STRE	603	608	activation by heat shock, osmotic stress, low pH, nutrient starvation	Abiotic / biotic stress related elements
AhWRKY96	CAAT-box	879	884	common cis-acting element in promoter and enhancer regions	promoter related elements
AhWRKY96	CAAT-box	1192	1197	common cis-acting element in promoter and enhancer regions	promoter related elements
AhWRKY96	GT1-motif	187	193	light responsive element	Abiotic / biotic stress related elements
AhWRKY96	TATA-box	1	5	core promoter element around -30 of transcription start	promoter related elements
AhWRKY96	TATA-box	116	120	core promoter element around -30 of transcription start	promoter related elements
AhWRKY96	TATA-box	130	134	core promoter element around -30 of transcription start	promoter related elements
AhWRKY96	TATA-box	273	279	core promoter element around -30 of transcription start	promoter related elements
AhWRKY96	TATA-box	275	279	core promoter element around -30 of transcription start	promoter related elements
AhWRKY96	TATA-box	285	289	core promoter element around -30 of transcription start	promoter related elements
AhWRKY96	TATA-box	365	369	core promoter element around -30 of transcription start	promoter related elements
AhWRKY96	TATA-box	385	390	core promoter element around -30 of transcription start	promoter related elements
AhWRKY96	TATA-box	386	390	core promoter element around -30 of transcription start	promoter related elements
AhWRKY96	TATA-box	449	453	core promoter element around -30 of transcription start	promoter related elements
AhWRKY96	TATA-box	456	460	core promoter element around -30 of transcription start	promoter related elements
AhWRKY96	TATA-box	626	630	core promoter element around -30 of transcription start	promoter related elements
AhWRKY96	TATA-box	674	679	core promoter element around -30 of transcription start	promoter related elements
AhWRKY96	TATA-box	675	679	core promoter element around -30 of transcription start	promoter related elements
AhWRKY96	TATA-box	707	711	core promoter element around -30 of transcription start	promoter related elements
AhWRKY96	TATA-box	771	775	core promoter element around -30 of transcription start	promoter related elements
AhWRKY96	TATA-box	781	785	core promoter element around -30 of transcription start	promoter related elements
AhWRKY96	TATA-box	912	922	core promoter element around -30 of transcription start	promoter related elements
AhWRKY96	TATA-box	918	922	core promoter element around -30 of transcription start	promoter related elements
AhWRKY96	TATA-box	1067	1077	core promoter element around -30 of transcription start	promoter related elements
AhWRKY96	TATA-box	1073	1077	core promoter element around -30 of transcription start	promoter related elements
AhWRKY96	TATA-box	1138	1142	core promoter element around -30 of transcription start	promoter related elements
AhWRKY96	TATA-box	1399	1404	core promoter element around -30 of transcription start	promoter related elements
AhWRKY96	TATA-box	1400	1404	core promoter element around -30 of transcription start	promoter related elements
AhWRKY96	TATA-box	1454	1459	core promoter element around -30 of transcription start	promoter related elements
AhWRKY96	TATA-box	1455	1459	core promoter element around -30 of transcription start	promoter related elements
AhWRKY96	TATA-box	1463	1470	core promoter element around -30 of transcription start	promoter related elements
AhWRKY96	TATA-box	1464	1470	core promoter element around -30 of transcription start	promoter related elements
AhWRKY96	TATA-box	1466	1470	core promoter element around -30 of transcription start	promoter related elements
AhWRKY96	TATA-box	1482	1489	core promoter element around -30 of transcription start	promoter related elements
AhWRKY96	TATA-box	1483	1489	core promoter element around -30 of transcription start	promoter related elements
AhWRKY96	TATA-box	1485	1489	core promoter element around -30 of transcription start	promoter related elements
AhWRKY96	MBS	246	252	MYB binding site involved in drought-inducibility	Abiotic / biotic stress related elements
AhWRKY48	W box	631	637	elicitation; wounding and pathogen responsievness. Binds WRKY type transcription factors	Abiotic / biotic stress related elements
AhWRKY48	AT~TATA-box	18	24	core promotor element	promoter related elements
AhWRKY48	AT~TATA-box	377	383	core promotor element	promoter related elements
AhWRKY48	AT~TATA-box	379	385	core promotor element	promoter related elements
AhWRKY48	AT~TATA-box	722	728	core promotor element	promoter related elements
AhWRKY48	AT~TATA-box	897	903	core promotor element	promoter related elements
AhWRKY48	AT~TATA-box	899	905	core promotor element	promoter related elements
AhWRKY48	AT~TATA-box	1410	1416	core promotor element	promoter related elements
AhWRKY48	AT~TATA-box	1432	1438	core promotor element	promoter related elements
AhWRKY48	AT~TATA-box	1458	1466	core promotor element	promoter related elements
AhWRKY48	AT~TATA-box	1460	1466	core promotor element	promoter related elements
AhWRKY48	AT~TATA-box	1492	1498	core promotor element	promoter related elements
AhWRKY48	AT~TATA-box	1494	1500	core promotor element	promoter related elements
AhWRKY48	AE-box	807	815	part of a module for light response	Abiotic / biotic stress related elements
AhWRKY48	CAAT-box	550	555	common cis-acting element in promoter and enhancer regions	promoter related elements
AhWRKY48	TATA	20	28	core promotor element	promoter related elements
AhWRKY48	TATA	74	82	core promotor element	promoter related elements
AhWRKY48	TATA	1198	1206	core promotor element	promoter related elements
AhWRKY48	GATA-motif	296	307	part of a light responsive element	Abiotic / biotic stress related elements
AhWRKY48	TATA-box	18	24	core promoter element around -30 of transcription start	promoter related elements
AhWRKY48	TATA-box	20	24	core promoter element around -30 of transcription start	promoter related elements
AhWRKY48	TATA-box	35	43	core promoter element around -30 of transcription start	promoter related elements
AhWRKY48	TATA-box	54	58	core promoter element around -30 of transcription start	promoter related elements
AhWRKY48	TATA-box	60	65	core promoter element around -30 of transcription start	promoter related elements
AhWRKY48	TATA-box	61	65	core promoter element around -30 of transcription start	promoter related elements
AhWRKY48	TATA-box	74	78	core promoter element around -30 of transcription start	promoter related elements
AhWRKY48	TATA-box	81	86	core promoter element around -30 of transcription start	promoter related elements
AhWRKY48	TATA-box	82	86	core promoter element around -30 of transcription start	promoter related elements
AhWRKY48	TATA-box	316	326	core promoter element around -30 of transcription start	promoter related elements
AhWRKY48	TATA-box	376	383	core promoter element around -30 of transcription start	promoter related elements
AhWRKY48	TATA-box	377	383	core promoter element around -30 of transcription start	promoter related elements
AhWRKY48	TATA-box	379	385	core promoter element around -30 of transcription start	promoter related elements
AhWRKY48	TATA-box	381	385	core promoter element around -30 of transcription start	promoter related elements
AhWRKY48	TATA-box	535	540	core promoter element around -30 of transcription start	promoter related elements
AhWRKY48	TATA-box	536	540	core promoter element around -30 of transcription start	promoter related elements
AhWRKY48	TATA-box	546	550	core promoter element around -30 of transcription start	promoter related elements
AhWRKY48	TATA-box	693	703	core promoter element around -30 of transcription start	promoter related elements
AhWRKY48	TATA-box	722	728	core promoter element around -30 of transcription start	promoter related elements
AhWRKY48	TATA-box	724	728	core promoter element around -30 of transcription start	promoter related elements
AhWRKY48	TATA-box	735	740	core promoter element around -30 of transcription start	promoter related elements
AhWRKY48	TATA-box	736	740	core promoter element around -30 of transcription start	promoter related elements
AhWRKY48	TATA-box	883	887	core promoter element around -30 of transcription start	promoter related elements
AhWRKY48	TATA-box	897	903	core promoter element around -30 of transcription start	promoter related elements
AhWRKY48	TATA-box	899	905	core promoter element around -30 of transcription start	promoter related elements
AhWRKY48	TATA-box	901	905	core promoter element around -30 of transcription start	promoter related elements
AhWRKY48	TATA-box	1084	1089	core promoter element around -30 of transcription start	promoter related elements
AhWRKY48	TATA-box	1085	1089	core promoter element around -30 of transcription start	promoter related elements
AhWRKY48	TATA-box	1197	1202	core promoter element around -30 of transcription start	promoter related elements
AhWRKY48	TATA-box	1198	1202	core promoter element around -30 of transcription start	promoter related elements
AhWRKY48	TATA-box	1283	1287	core promoter element around -30 of transcription start	promoter related elements
AhWRKY48	TATA-box	1313	1318	core promoter element around -30 of transcription start	promoter related elements
AhWRKY48	TATA-box	1314	1318	core promoter element around -30 of transcription start	promoter related elements
AhWRKY48	TATA-box	1399	1407	core promoter element around -30 of transcription start	promoter related elements
AhWRKY48	TATA-box	1410	1416	core promoter element around -30 of transcription start	promoter related elements
AhWRKY48	TATA-box	1412	1416	core promoter element around -30 of transcription start	promoter related elements
AhWRKY48	TATA-box	1432	1438	core promoter element around -30 of transcription start	promoter related elements
AhWRKY48	TATA-box	1434	1438	core promoter element around -30 of transcription start	promoter related elements
AhWRKY48	TATA-box	1452	1462	core promoter element around -30 of transcription start	promoter related elements
AhWRKY48	TATA-box	1456	1466	core promoter element around -30 of transcription start	promoter related elements
AhWRKY48	TATA-box	1459	1466	core promoter element around -30 of transcription start	promoter related elements
AhWRKY48	TATA-box	1460	1466	core promoter element around -30 of transcription start	promoter related elements
AhWRKY48	TATA-box	1462	1466	core promoter element around -30 of transcription start	promoter related elements
AhWRKY48	TATA-box	1469	1473	core promoter element around -30 of transcription start	promoter related elements
AhWRKY48	TATA-box	1492	1498	core promoter element around -30 of transcription start	promoter related elements
AhWRKY48	TATA-box	1494	1500	core promoter element around -30 of transcription start	promoter related elements
AhWRKY48	TATA-box	1496	1500	core promoter element around -30 of transcription start	promoter related elements
AhWRKY48	GA-motif	6	14	part of a light responsive element	Abiotic / biotic stress related elements
AhWRKY82	as-1	342	347	Part of the promoter of the Arabidopsis gene encoding Pro dehydrogenase (ProDH), a mitochondrial enzyme involved in the first step of the conversion of Pro to glutamic acid.	Abiotic / biotic stress related elements
AhWRKY82	as-1	531	536	Part of the promoter of the Arabidopsis gene encoding Pro dehydrogenase (ProDH), a mitochondrial enzyme involved in the first step of the conversion of Pro to glutamic acid.	Abiotic / biotic stress related elements
AhWRKY82	AE-box	1043	1051	part of a module for light response	Abiotic / biotic stress related elements
AhWRKY82	AE-box	1057	1065	part of a module for light response	Abiotic / biotic stress related elements
AhWRKY82	W box	506	512	elicitation; wounding and pathogen responsievness. Binds WRKY type transcription factors	Abiotic / biotic stress related elements
AhWRKY82	W box	1156	1162	elicitation; wounding and pathogen responsievness. Binds WRKY type transcription factors	Abiotic / biotic stress related elements
AhWRKY82	AT~TATA-box	959	965	core promotor element	promoter related elements
AhWRKY82	AT~TATA-box	1218	1224	core promotor element	promoter related elements
AhWRKY82	AT~TATA-box	1220	1226	core promotor element	promoter related elements
AhWRKY82	AT~TATA-box	1222	1228	core promotor element	promoter related elements
AhWRKY82	AT~TATA-box	1224	1230	core promotor element	promoter related elements
AhWRKY82	AT~TATA-box	1226	1232	core promotor element	promoter related elements
AhWRKY82	AT~TATA-box	1228	1234	core promotor element	promoter related elements
AhWRKY82	AT~TATA-box	1230	1236	core promotor element	promoter related elements
AhWRKY82	AT~TATA-box	1232	1238	core promotor element	promoter related elements
AhWRKY82	AT~TATA-box	1234	1240	core promotor element	promoter related elements
AhWRKY82	AT~TATA-box	1236	1242	core promotor element	promoter related elements
AhWRKY82	AT~TATA-box	1238	1244	core promotor element	promoter related elements
AhWRKY82	AT~TATA-box	1240	1246	core promotor element	promoter related elements
AhWRKY82	AT~TATA-box	1242	1248	core promotor element	promoter related elements
AhWRKY82	AT~TATA-box	1244	1250	core promotor element	promoter related elements
AhWRKY82	AT~TATA-box	1246	1252	core promotor element	promoter related elements
AhWRKY82	AT~TATA-box	1248	1254	core promotor element	promoter related elements
AhWRKY82	AT~TATA-box	1250	1256	core promotor element	promoter related elements
AhWRKY82	AT~TATA-box	1252	1258	core promotor element	promoter related elements
AhWRKY82	AT~TATA-box	1254	1260	core promotor element	promoter related elements
AhWRKY82	AT~TATA-box	1256	1262	core promotor element	promoter related elements
AhWRKY82	AT~TATA-box	1258	1264	core promotor element	promoter related elements
AhWRKY82	AT~TATA-box	1260	1266	core promotor element	promoter related elements
AhWRKY82	AT~TATA-box	1262	1268	core promotor element	promoter related elements
AhWRKY82	AT~TATA-box	1357	1363	core promotor element	promoter related elements
AhWRKY82	AT~TATA-box	1394	1400	core promotor element	promoter related elements
AhWRKY82	STRE	553	558	activation by heat shock, osmotic stress, low pH, nutrient starvation	Abiotic / biotic stress related elements
AhWRKY82	CAAT-box	1472	1477	common cis-acting element in promoter and enhancer regions	promoter related elements
AhWRKY82	box S	406	413	wounding and pathogen respons	Abiotic / biotic stress related elements
AhWRKY82	G-box	1080	1086	cis-acting regulatory element involved in light responsiveness	Abiotic / biotic stress related elements
AhWRKY82	TATA-box	10	14	core promoter element around -30 of transcription start	promoter related elements
AhWRKY82	TATA-box	129	133	core promoter element around -30 of transcription start	promoter related elements
AhWRKY82	TATA-box	290	298	core promoter element around -30 of transcription start	promoter related elements
AhWRKY82	TATA-box	922	926	core promoter element around -30 of transcription start	promoter related elements
AhWRKY82	TATA-box	959	965	core promoter element around -30 of transcription start	promoter related elements
AhWRKY82	TATA-box	961	965	core promoter element around -30 of transcription start	promoter related elements
AhWRKY82	TATA-box	1216	1226	core promoter element around -30 of transcription start	promoter related elements
AhWRKY82	TATA-box	1218	1224	core promoter element around -30 of transcription start	promoter related elements
AhWRKY82	TATA-box	1220	1226	core promoter element around -30 of transcription start	promoter related elements
AhWRKY82	TATA-box	1222	1228	core promoter element around -30 of transcription start	promoter related elements
AhWRKY82	TATA-box	1224	1230	core promoter element around -30 of transcription start	promoter related elements
AhWRKY82	TATA-box	1226	1232	core promoter element around -30 of transcription start	promoter related elements
AhWRKY82	TATA-box	1228	1234	core promoter element around -30 of transcription start	promoter related elements
AhWRKY82	TATA-box	1230	1236	core promoter element around -30 of transcription start	promoter related elements
AhWRKY82	TATA-box	1232	1238	core promoter element around -30 of transcription start	promoter related elements
AhWRKY82	TATA-box	1234	1240	core promoter element around -30 of transcription start	promoter related elements
AhWRKY82	TATA-box	1236	1242	core promoter element around -30 of transcription start	promoter related elements
AhWRKY82	TATA-box	1238	1244	core promoter element around -30 of transcription start	promoter related elements
AhWRKY82	TATA-box	1240	1246	core promoter element around -30 of transcription start	promoter related elements
AhWRKY82	TATA-box	1242	1248	core promoter element around -30 of transcription start	promoter related elements
AhWRKY82	TATA-box	1244	1250	core promoter element around -30 of transcription start	promoter related elements
AhWRKY82	TATA-box	1246	1252	core promoter element around -30 of transcription start	promoter related elements
AhWRKY82	TATA-box	1248	1254	core promoter element around -30 of transcription start	promoter related elements
AhWRKY82	TATA-box	1250	1256	core promoter element around -30 of transcription start	promoter related elements
AhWRKY82	TATA-box	1252	1258	core promoter element around -30 of transcription start	promoter related elements
AhWRKY82	TATA-box	1254	1260	core promoter element around -30 of transcription start	promoter related elements
AhWRKY82	TATA-box	1256	1262	core promoter element around -30 of transcription start	promoter related elements
AhWRKY82	TATA-box	1258	1264	core promoter element around -30 of transcription start	promoter related elements
AhWRKY82	TATA-box	1260	1266	core promoter element around -30 of transcription start	promoter related elements
AhWRKY82	TATA-box	1262	1268	core promoter element around -30 of transcription start	promoter related elements
AhWRKY82	TATA-box	1264	1268	core promoter element around -30 of transcription start	promoter related elements
AhWRKY82	TATA-box	1283	1288	core promoter element around -30 of transcription start	promoter related elements
AhWRKY82	TATA-box	1284	1288	core promoter element around -30 of transcription start	promoter related elements
AhWRKY82	TATA-box	1306	1311	core promoter element around -30 of transcription start	promoter related elements
AhWRKY82	TATA-box	1307	1311	core promoter element around -30 of transcription start	promoter related elements
AhWRKY82	TATA-box	1312	1316	core promoter element around -30 of transcription start	promoter related elements
AhWRKY82	TATA-box	1357	1363	core promoter element around -30 of transcription start	promoter related elements
AhWRKY82	TATA-box	1359	1363	core promoter element around -30 of transcription start	promoter related elements
AhWRKY82	TATA-box	1377	1381	core promoter element around -30 of transcription start	promoter related elements
AhWRKY82	TATA-box	1393	1400	core promoter element around -30 of transcription start	promoter related elements
AhWRKY82	TATA-box	1394	1400	core promoter element around -30 of transcription start	promoter related elements
AhWRKY82	TATA-box	1396	1400	core promoter element around -30 of transcription start	promoter related elements
AhWRKY82	TCT-motif	808	814	part of a light responsive element	Abiotic / biotic stress related elements
AhWRKY82	ABRE	1080	1086	cis-acting element involved in the abscisic acid responsiveness	hormone related elements
AhWRKY82	ABRE	1081	1086	cis-acting element involved in the abscisic acid responsiveness	hormone related elements
AhWRKY21	as-1	321	326	Part of the promoter of the Arabidopsis gene encoding Pro dehydrogenase (ProDH), a mitochondrial enzyme involved in the first step of the conversion of Pro to glutamic acid.	Abiotic / biotic stress related elements
AhWRKY21	as-1	796	801	Part of the promoter of the Arabidopsis gene encoding Pro dehydrogenase (ProDH), a mitochondrial enzyme involved in the first step of the conversion of Pro to glutamic acid.	Abiotic / biotic stress related elements
AhWRKY21	AT~TATA-box	1348	1354	core promotor element	promoter related elements
AhWRKY21	AE-box	84	92	part of a module for light response	Abiotic / biotic stress related elements
AhWRKY21	AE-box	756	764	part of a module for light response	Abiotic / biotic stress related elements
AhWRKY21	CAAT-box	148	153	common cis-acting element in promoter and enhancer regions	promoter related elements
AhWRKY21	CAAT-box	522	527	common cis-acting element in promoter and enhancer regions	promoter related elements
AhWRKY21	CAAT-box	1379	1384	common cis-acting element in promoter and enhancer regions	promoter related elements
AhWRKY21	TATA-box	2	6	core promoter element around -30 of transcription start	promoter related elements
AhWRKY21	TATA-box	36	40	core promoter element around -30 of transcription start	promoter related elements
AhWRKY21	TATA-box	54	59	core promoter element around -30 of transcription start	promoter related elements
AhWRKY21	TATA-box	55	59	core promoter element around -30 of transcription start	promoter related elements
AhWRKY21	TATA-box	120	124	core promoter element around -30 of transcription start	promoter related elements
AhWRKY21	TATA-box	139	143	core promoter element around -30 of transcription start	promoter related elements
AhWRKY21	TATA-box	155	159	core promoter element around -30 of transcription start	promoter related elements
AhWRKY21	TATA-box	180	184	core promoter element around -30 of transcription start	promoter related elements
AhWRKY21	TATA-box	752	756	core promoter element around -30 of transcription start	promoter related elements
AhWRKY21	TATA-box	888	893	core promoter element around -30 of transcription start	promoter related elements
AhWRKY21	TATA-box	889	893	core promoter element around -30 of transcription start	promoter related elements
AhWRKY21	TATA-box	982	986	core promoter element around -30 of transcription start	promoter related elements
AhWRKY21	TATA-box	1197	1202	core promoter element around -30 of transcription start	promoter related elements
AhWRKY21	TATA-box	1198	1202	core promoter element around -30 of transcription start	promoter related elements
AhWRKY21	TATA-box	1253	1258	core promoter element around -30 of transcription start	promoter related elements
AhWRKY21	TATA-box	1254	1258	core promoter element around -30 of transcription start	promoter related elements
AhWRKY21	TATA-box	1348	1354	core promoter element around -30 of transcription start	promoter related elements
AhWRKY21	TATA-box	1350	1354	core promoter element around -30 of transcription start	promoter related elements
AhWRKY21	GA-motif	962	970	part of a light responsive element	Abiotic / biotic stress related elements
AhWRKY21	TCT-motif	349	355	part of a light responsive element	Abiotic / biotic stress related elements
AhWRKY21	TCT-motif	999	1005	part of a light responsive element	Abiotic / biotic stress related elements
AhWRKY21	ABRE	229	234	cis-acting element involved in the abscisic acid responsiveness	hormone related elements
AhWRKY21	ABRE	1243	1248	cis-acting element involved in the abscisic acid responsiveness	hormone related elements
AhWRKY4	as-1	1123	1128	Part of the promoter of the Arabidopsis gene encoding Pro dehydrogenase (ProDH), a mitochondrial enzyme involved in the first step of the conversion of Pro to glutamic acid.	Abiotic / biotic stress related elements
AhWRKY4	CAG-motif	1412	1423	part of a light response element	Abiotic / biotic stress related elements
AhWRKY4	TATA	1096	1104	core promotor element	promoter related elements
AhWRKY4	W box	1461	1467	elicitation; wounding and pathogen responsievness. Binds WRKY type transcription factors	Abiotic / biotic stress related elements
AhWRKY4	AT~TATA-box	364	370	core promotor element	promoter related elements
AhWRKY4	AT~TATA-box	366	372	core promotor element	promoter related elements
AhWRKY4	CAAT-box	546	551	common cis-acting element in promoter and enhancer regions	promoter related elements
AhWRKY4	CAAT-box	929	934	common cis-acting element in promoter and enhancer regions	promoter related elements
AhWRKY4	CAAT-box	966	971	common cis-acting element in promoter and enhancer regions	promoter related elements
AhWRKY4	CAAT-box	1196	1201	common cis-acting element in promoter and enhancer regions	promoter related elements
AhWRKY4	CAAT-box	1433	1438	common cis-acting element in promoter and enhancer regions	promoter related elements
AhWRKY4	TATA-box	111	119	core promoter element around -30 of transcription start	promoter related elements
AhWRKY4	TATA-box	216	220	core promoter element around -30 of transcription start	promoter related elements
AhWRKY4	TATA-box	239	244	core promoter element around -30 of transcription start	promoter related elements
AhWRKY4	TATA-box	240	244	core promoter element around -30 of transcription start	promoter related elements
AhWRKY4	TATA-box	344	349	core promoter element around -30 of transcription start	promoter related elements
AhWRKY4	TATA-box	345	349	core promoter element around -30 of transcription start	promoter related elements
AhWRKY4	TATA-box	363	370	core promoter element around -30 of transcription start	promoter related elements
AhWRKY4	TATA-box	364	370	core promoter element around -30 of transcription start	promoter related elements
AhWRKY4	TATA-box	366	372	core promoter element around -30 of transcription start	promoter related elements
AhWRKY4	TATA-box	368	372	core promoter element around -30 of transcription start	promoter related elements
AhWRKY4	TATA-box	629	634	core promoter element around -30 of transcription start	promoter related elements
AhWRKY4	TATA-box	630	634	core promoter element around -30 of transcription start	promoter related elements
AhWRKY4	TATA-box	644	648	core promoter element around -30 of transcription start	promoter related elements
AhWRKY4	TATA-box	758	768	core promoter element around -30 of transcription start	promoter related elements
AhWRKY4	TATA-box	863	867	core promoter element around -30 of transcription start	promoter related elements
AhWRKY4	TATA-box	1099	1104	core promoter element around -30 of transcription start	promoter related elements
AhWRKY4	TATA-box	1100	1104	core promoter element around -30 of transcription start	promoter related elements
AhWRKY4	TATA-box	1185	1190	core promoter element around -30 of transcription start	promoter related elements
AhWRKY4	TATA-box	1186	1190	core promoter element around -30 of transcription start	promoter related elements
AhWRKY4	TATA-box	1212	1217	core promoter element around -30 of transcription start	promoter related elements
AhWRKY4	TATA-box	1213	1217	core promoter element around -30 of transcription start	promoter related elements
AhWRKY4	TATA-box	1266	1276	core promoter element around -30 of transcription start	promoter related elements
AhWRKY4	TATA-box	1272	1276	core promoter element around -30 of transcription start	promoter related elements
AhWRKY4	TATA-box	1340	1345	core promoter element around -30 of transcription start	promoter related elements
AhWRKY4	TATA-box	1341	1345	core promoter element around -30 of transcription start	promoter related elements
AhWRKY38	as-1	572	577	Part of the promoter of the Arabidopsis gene encoding Pro dehydrogenase (ProDH), a mitochondrial enzyme involved in the first step of the conversion of Pro to glutamic acid.	Abiotic / biotic stress related elements
AhWRKY38	as-1	827	832	Part of the promoter of the Arabidopsis gene encoding Pro dehydrogenase (ProDH), a mitochondrial enzyme involved in the first step of the conversion of Pro to glutamic acid.	Abiotic / biotic stress related elements
AhWRKY38	as-1	1267	1272	Part of the promoter of the Arabidopsis gene encoding Pro dehydrogenase (ProDH), a mitochondrial enzyme involved in the first step of the conversion of Pro to glutamic acid.	Abiotic / biotic stress related elements
AhWRKY38	AT~TATA-box	1063	1069	core promotor element	promoter related elements
AhWRKY38	STRE	344	349	activation by heat shock, osmotic stress, low pH, nutrient starvation	Abiotic / biotic stress related elements
AhWRKY38	STRE	1440	1445	activation by heat shock, osmotic stress, low pH, nutrient starvation	Abiotic / biotic stress related elements
AhWRKY38	CAAT-box	56	61	common cis-acting element in promoter and enhancer regions	promoter related elements
AhWRKY38	CAAT-box	418	423	common cis-acting element in promoter and enhancer regions	promoter related elements
AhWRKY38	CAAT-box	661	666	common cis-acting element in promoter and enhancer regions	promoter related elements
AhWRKY38	CAAT-box	702	710	common cis-acting element in promoter and enhancer regions	promoter related elements
AhWRKY38	CAAT-box	704	709	common cis-acting element in promoter and enhancer regions	promoter related elements
AhWRKY38	CAAT-box	1245	1250	common cis-acting element in promoter and enhancer regions	promoter related elements
AhWRKY38	CAAT-box	1389	1394	common cis-acting element in promoter and enhancer regions	promoter related elements
AhWRKY38	CAAT-box	1392	1397	common cis-acting element in promoter and enhancer regions	promoter related elements
AhWRKY38	CAAT-box	1399	1404	common cis-acting element in promoter and enhancer regions	promoter related elements
AhWRKY38	TATA-box	96	100	core promoter element around -30 of transcription start	promoter related elements
AhWRKY38	TATA-box	219	223	core promoter element around -30 of transcription start	promoter related elements
AhWRKY38	TATA-box	915	919	core promoter element around -30 of transcription start	promoter related elements
AhWRKY38	TATA-box	937	942	core promoter element around -30 of transcription start	promoter related elements
AhWRKY38	TATA-box	938	942	core promoter element around -30 of transcription start	promoter related elements
AhWRKY38	TATA-box	952	957	core promoter element around -30 of transcription start	promoter related elements
AhWRKY38	TATA-box	953	957	core promoter element around -30 of transcription start	promoter related elements
AhWRKY38	TATA-box	959	969	core promoter element around -30 of transcription start	promoter related elements
AhWRKY38	TATA-box	961	965	core promoter element around -30 of transcription start	promoter related elements
AhWRKY38	TATA-box	1057	1061	core promoter element around -30 of transcription start	promoter related elements
AhWRKY38	TATA-box	1063	1069	core promoter element around -30 of transcription start	promoter related elements
AhWRKY38	TATA-box	1065	1069	core promoter element around -30 of transcription start	promoter related elements
AhWRKY38	TATA-box	1412	1420	core promoter element around -30 of transcription start	promoter related elements
AhWRKY38	TCT-motif	432	438	part of a light responsive element	Abiotic / biotic stress related elements
AhWRKY36	W box	285	291	elicitation; wounding and pathogen responsievness. Binds WRKY type transcription factors	Abiotic / biotic stress related elements
AhWRKY36	AT~TATA-box	1022	1028	core promotor element	promoter related elements
AhWRKY36	AT~TATA-box	1024	1030	core promotor element	promoter related elements
AhWRKY36	AT~TATA-box	1026	1032	core promotor element	promoter related elements
AhWRKY36	AT~TATA-box	1028	1034	core promotor element	promoter related elements
AhWRKY36	AT~TATA-box	1030	1036	core promotor element	promoter related elements
AhWRKY36	AT~TATA-box	1032	1038	core promotor element	promoter related elements
AhWRKY36	AT~TATA-box	1034	1040	core promotor element	promoter related elements
AhWRKY36	AT~TATA-box	1036	1042	core promotor element	promoter related elements
AhWRKY36	AT~TATA-box	1038	1044	core promotor element	promoter related elements
AhWRKY36	AT~TATA-box	1040	1046	core promotor element	promoter related elements
AhWRKY36	AT~TATA-box	1042	1048	core promotor element	promoter related elements
AhWRKY36	AT~TATA-box	1044	1050	core promotor element	promoter related elements
AhWRKY36	AT~TATA-box	1046	1052	core promotor element	promoter related elements
AhWRKY36	AT~TATA-box	1048	1054	core promotor element	promoter related elements
AhWRKY36	AT~TATA-box	1050	1056	core promotor element	promoter related elements
AhWRKY36	AT~TATA-box	1052	1058	core promotor element	promoter related elements
AhWRKY36	AT~TATA-box	1054	1060	core promotor element	promoter related elements
AhWRKY36	AT~TATA-box	1056	1062	core promotor element	promoter related elements
AhWRKY36	AT~TATA-box	1058	1064	core promotor element	promoter related elements
AhWRKY36	AT~TATA-box	1060	1066	core promotor element	promoter related elements
AhWRKY36	AT~TATA-box	1062	1068	core promotor element	promoter related elements
AhWRKY36	AT~TATA-box	1064	1070	core promotor element	promoter related elements
AhWRKY36	AT~TATA-box	1066	1072	core promotor element	promoter related elements
AhWRKY36	AT~TATA-box	1068	1074	core promotor element	promoter related elements
AhWRKY36	AT~TATA-box	1070	1076	core promotor element	promoter related elements
AhWRKY36	AT~TATA-box	1072	1078	core promotor element	promoter related elements
AhWRKY36	AT~TATA-box	1074	1080	core promotor element	promoter related elements
AhWRKY36	AT~TATA-box	1076	1082	core promotor element	promoter related elements
AhWRKY36	AT~TATA-box	1078	1084	core promotor element	promoter related elements
AhWRKY36	AT~TATA-box	1080	1086	core promotor element	promoter related elements
AhWRKY36	AT~TATA-box	1082	1088	core promotor element	promoter related elements
AhWRKY36	AT~TATA-box	1084	1090	core promotor element	promoter related elements
AhWRKY36	AT~TATA-box	1086	1092	core promotor element	promoter related elements
AhWRKY36	AT~TATA-box	1121	1127	core promotor element	promoter related elements
AhWRKY36	AT~TATA-box	1230	1236	core promotor element	promoter related elements
AhWRKY36	AT~TATA-box	1232	1238	core promotor element	promoter related elements
AhWRKY36	AT~TATA-box	1234	1240	core promotor element	promoter related elements
AhWRKY36	AT~TATA-box	1236	1242	core promotor element	promoter related elements
AhWRKY36	AT~TATA-box	1238	1244	core promotor element	promoter related elements
AhWRKY36	AT~TATA-box	1240	1246	core promotor element	promoter related elements
AhWRKY36	AT~TATA-box	1242	1248	core promotor element	promoter related elements
AhWRKY36	AT~TATA-box	1244	1250	core promotor element	promoter related elements
AhWRKY36	AT~TATA-box	1246	1252	core promotor element	promoter related elements
AhWRKY36	AT~TATA-box	1248	1254	core promotor element	promoter related elements
AhWRKY36	AT~TATA-box	1250	1256	core promotor element	promoter related elements
AhWRKY36	AT~TATA-box	1252	1258	core promotor element	promoter related elements
AhWRKY36	AT~TATA-box	1254	1260	core promotor element	promoter related elements
AhWRKY36	AT~TATA-box	1256	1262	core promotor element	promoter related elements
AhWRKY36	AT~TATA-box	1258	1264	core promotor element	promoter related elements
AhWRKY36	AT~TATA-box	1260	1266	core promotor element	promoter related elements
AhWRKY36	AT~TATA-box	1262	1268	core promotor element	promoter related elements
AhWRKY36	AT~TATA-box	1264	1270	core promotor element	promoter related elements
AhWRKY36	AT~TATA-box	1266	1272	core promotor element	promoter related elements
AhWRKY36	AT~TATA-box	1268	1274	core promotor element	promoter related elements
AhWRKY36	AT~TATA-box	1270	1276	core promotor element	promoter related elements
AhWRKY36	AT~TATA-box	1272	1278	core promotor element	promoter related elements
AhWRKY36	AT~TATA-box	1274	1280	core promotor element	promoter related elements
AhWRKY36	AT~TATA-box	1276	1282	core promotor element	promoter related elements
AhWRKY36	AT~TATA-box	1278	1284	core promotor element	promoter related elements
AhWRKY36	AT~TATA-box	1280	1286	core promotor element	promoter related elements
AhWRKY36	AT~TATA-box	1282	1288	core promotor element	promoter related elements
AhWRKY36	AT~TATA-box	1284	1290	core promotor element	promoter related elements
AhWRKY36	AT~TATA-box	1370	1376	core promotor element	promoter related elements
AhWRKY36	AT~TATA-box	1492	1498	core promotor element	promoter related elements
AhWRKY36	CAAT-box	100	105	common cis-acting element in promoter and enhancer regions	promoter related elements
AhWRKY36	TATA	103	111	core promotor element	promoter related elements
AhWRKY36	TATA	910	918	core promotor element	promoter related elements
AhWRKY36	TATA-box	25	30	core promoter element around -30 of transcription start	promoter related elements
AhWRKY36	TATA-box	26	30	core promoter element around -30 of transcription start	promoter related elements
AhWRKY36	TATA-box	57	61	core promoter element around -30 of transcription start	promoter related elements
AhWRKY36	TATA-box	106	111	core promoter element around -30 of transcription start	promoter related elements
AhWRKY36	TATA-box	107	111	core promoter element around -30 of transcription start	promoter related elements
AhWRKY36	TATA-box	212	217	core promoter element around -30 of transcription start	promoter related elements
AhWRKY36	TATA-box	392	402	core promoter element around -30 of transcription start	promoter related elements
AhWRKY36	TATA-box	399	404	core promoter element around -30 of transcription start	promoter related elements
AhWRKY36	TATA-box	400	404	core promoter element around -30 of transcription start	promoter related elements
AhWRKY36	TATA-box	568	572	core promoter element around -30 of transcription start	promoter related elements
AhWRKY36	TATA-box	583	588	core promoter element around -30 of transcription start	promoter related elements
AhWRKY36	TATA-box	584	588	core promoter element around -30 of transcription start	promoter related elements
AhWRKY36	TATA-box	614	619	core promoter element around -30 of transcription start	promoter related elements
AhWRKY36	TATA-box	615	619	core promoter element around -30 of transcription start	promoter related elements
AhWRKY36	TATA-box	639	643	core promoter element around -30 of transcription start	promoter related elements
AhWRKY36	TATA-box	683	687	core promoter element around -30 of transcription start	promoter related elements
AhWRKY36	TATA-box	756	760	core promoter element around -30 of transcription start	promoter related elements
AhWRKY36	TATA-box	850	855	core promoter element around -30 of transcription start	promoter related elements
AhWRKY36	TATA-box	851	855	core promoter element around -30 of transcription start	promoter related elements
AhWRKY36	TATA-box	875	879	core promoter element around -30 of transcription start	promoter related elements
AhWRKY36	TATA-box	910	914	core promoter element around -30 of transcription start	promoter related elements
AhWRKY36	TATA-box	928	932	core promoter element around -30 of transcription start	promoter related elements
AhWRKY36	TATA-box	940	945	core promoter element around -30 of transcription start	promoter related elements
AhWRKY36	TATA-box	941	945	core promoter element around -30 of transcription start	promoter related elements
AhWRKY36	TATA-box	949	953	core promoter element around -30 of transcription start	promoter related elements
AhWRKY36	TATA-box	964	968	core promoter element around -30 of transcription start	promoter related elements
AhWRKY36	TATA-box	979	983	core promoter element around -30 of transcription start	promoter related elements
AhWRKY36	TATA-box	1022	1028	core promoter element around -30 of transcription start	promoter related elements
AhWRKY36	TATA-box	1024	1030	core promoter element around -30 of transcription start	promoter related elements
AhWRKY36	TATA-box	1026	1032	core promoter element around -30 of transcription start	promoter related elements
AhWRKY36	TATA-box	1028	1034	core promoter element around -30 of transcription start	promoter related elements
AhWRKY36	TATA-box	1030	1036	core promoter element around -30 of transcription start	promoter related elements
AhWRKY36	TATA-box	1032	1038	core promoter element around -30 of transcription start	promoter related elements
AhWRKY36	TATA-box	1034	1040	core promoter element around -30 of transcription start	promoter related elements
AhWRKY36	TATA-box	1036	1042	core promoter element around -30 of transcription start	promoter related elements
AhWRKY36	TATA-box	1038	1044	core promoter element around -30 of transcription start	promoter related elements
AhWRKY36	TATA-box	1040	1046	core promoter element around -30 of transcription start	promoter related elements
AhWRKY36	TATA-box	1042	1048	core promoter element around -30 of transcription start	promoter related elements
AhWRKY36	TATA-box	1044	1050	core promoter element around -30 of transcription start	promoter related elements
AhWRKY36	TATA-box	1046	1052	core promoter element around -30 of transcription start	promoter related elements
AhWRKY36	TATA-box	1048	1054	core promoter element around -30 of transcription start	promoter related elements
AhWRKY36	TATA-box	1050	1056	core promoter element around -30 of transcription start	promoter related elements
AhWRKY36	TATA-box	1052	1058	core promoter element around -30 of transcription start	promoter related elements
AhWRKY36	TATA-box	1054	1060	core promoter element around -30 of transcription start	promoter related elements
AhWRKY36	TATA-box	1056	1062	core promoter element around -30 of transcription start	promoter related elements
AhWRKY36	TATA-box	1058	1064	core promoter element around -30 of transcription start	promoter related elements
AhWRKY36	TATA-box	1060	1066	core promoter element around -30 of transcription start	promoter related elements
AhWRKY36	TATA-box	1062	1068	core promoter element around -30 of transcription start	promoter related elements
AhWRKY36	TATA-box	1064	1070	core promoter element around -30 of transcription start	promoter related elements
AhWRKY36	TATA-box	1066	1072	core promoter element around -30 of transcription start	promoter related elements
AhWRKY36	TATA-box	1068	1074	core promoter element around -30 of transcription start	promoter related elements
AhWRKY36	TATA-box	1070	1076	core promoter element around -30 of transcription start	promoter related elements
AhWRKY36	TATA-box	1072	1078	core promoter element around -30 of transcription start	promoter related elements
AhWRKY36	TATA-box	1074	1080	core promoter element around -30 of transcription start	promoter related elements
AhWRKY36	TATA-box	1076	1082	core promoter element around -30 of transcription start	promoter related elements
AhWRKY36	TATA-box	1078	1084	core promoter element around -30 of transcription start	promoter related elements
AhWRKY36	TATA-box	1080	1086	core promoter element around -30 of transcription start	promoter related elements
AhWRKY36	TATA-box	1082	1088	core promoter element around -30 of transcription start	promoter related elements
AhWRKY36	TATA-box	1084	1090	core promoter element around -30 of transcription start	promoter related elements
AhWRKY36	TATA-box	1086	1092	core promoter element around -30 of transcription start	promoter related elements
AhWRKY36	TATA-box	1088	1092	core promoter element around -30 of transcription start	promoter related elements
AhWRKY36	TATA-box	1121	1127	core promoter element around -30 of transcription start	promoter related elements
AhWRKY36	TATA-box	1229	1236	core promoter element around -30 of transcription start	promoter related elements
AhWRKY36	TATA-box	1230	1236	core promoter element around -30 of transcription start	promoter related elements
AhWRKY36	TATA-box	1232	1238	core promoter element around -30 of transcription start	promoter related elements
AhWRKY36	TATA-box	1234	1240	core promoter element around -30 of transcription start	promoter related elements
AhWRKY36	TATA-box	1236	1242	core promoter element around -30 of transcription start	promoter related elements
AhWRKY36	TATA-box	1238	1244	core promoter element around -30 of transcription start	promoter related elements
AhWRKY36	TATA-box	1240	1246	core promoter element around -30 of transcription start	promoter related elements
AhWRKY36	TATA-box	1242	1248	core promoter element around -30 of transcription start	promoter related elements
AhWRKY36	TATA-box	1244	1250	core promoter element around -30 of transcription start	promoter related elements
AhWRKY36	TATA-box	1246	1252	core promoter element around -30 of transcription start	promoter related elements
AhWRKY36	TATA-box	1248	1254	core promoter element around -30 of transcription start	promoter related elements
AhWRKY36	TATA-box	1250	1256	core promoter element around -30 of transcription start	promoter related elements
AhWRKY36	TATA-box	1252	1258	core promoter element around -30 of transcription start	promoter related elements
AhWRKY36	TATA-box	1254	1260	core promoter element around -30 of transcription start	promoter related elements
AhWRKY36	TATA-box	1256	1262	core promoter element around -30 of transcription start	promoter related elements
AhWRKY36	TATA-box	1258	1264	core promoter element around -30 of transcription start	promoter related elements
AhWRKY36	TATA-box	1260	1266	core promoter element around -30 of transcription start	promoter related elements
AhWRKY36	TATA-box	1262	1268	core promoter element around -30 of transcription start	promoter related elements
AhWRKY36	TATA-box	1264	1270	core promoter element around -30 of transcription start	promoter related elements
AhWRKY36	TATA-box	1266	1272	core promoter element around -30 of transcription start	promoter related elements
AhWRKY36	TATA-box	1268	1274	core promoter element around -30 of transcription start	promoter related elements
AhWRKY36	TATA-box	1270	1276	core promoter element around -30 of transcription start	promoter related elements
AhWRKY36	TATA-box	1272	1278	core promoter element around -30 of transcription start	promoter related elements
AhWRKY36	TATA-box	1274	1280	core promoter element around -30 of transcription start	promoter related elements
AhWRKY36	TATA-box	1276	1282	core promoter element around -30 of transcription start	promoter related elements
AhWRKY36	TATA-box	1278	1284	core promoter element around -30 of transcription start	promoter related elements
AhWRKY36	TATA-box	1280	1286	core promoter element around -30 of transcription start	promoter related elements
AhWRKY36	TATA-box	1282	1288	core promoter element around -30 of transcription start	promoter related elements
AhWRKY36	TATA-box	1284	1290	core promoter element around -30 of transcription start	promoter related elements
AhWRKY36	TATA-box	1286	1290	core promoter element around -30 of transcription start	promoter related elements
AhWRKY36	TATA-box	1320	1324	core promoter element around -30 of transcription start	promoter related elements
AhWRKY36	TATA-box	1370	1376	core promoter element around -30 of transcription start	promoter related elements
AhWRKY36	TATA-box	1372	1376	core promoter element around -30 of transcription start	promoter related elements
AhWRKY36	TATA-box	1379	1383	core promoter element around -30 of transcription start	promoter related elements
AhWRKY36	TATA-box	1474	1479	core promoter element around -30 of transcription start	promoter related elements
AhWRKY36	TATA-box	1475	1479	core promoter element around -30 of transcription start	promoter related elements
AhWRKY36	TATA-box	1492	1498	core promoter element around -30 of transcription start	promoter related elements
AhWRKY36	TATA-box	1494	1498	core promoter element around -30 of transcription start	promoter related elements
AhWRKY56	W box	892	898	elicitation; wounding and pathogen responsievness. Binds WRKY type transcription factors	Abiotic / biotic stress related elements
AhWRKY56	Gap-box	223	237	part of a light responsive element	Abiotic / biotic stress related elements
AhWRKY56	AT~TATA-box	261	269	core promotor element	promoter related elements
AhWRKY56	AT~TATA-box	263	269	core promotor element	promoter related elements
AhWRKY56	AT~TATA-box	265	271	core promotor element	promoter related elements
AhWRKY56	AT~TATA-box	267	273	core promotor element	promoter related elements
AhWRKY56	AT~TATA-box	269	275	core promotor element	promoter related elements
AhWRKY56	AT~TATA-box	271	277	core promotor element	promoter related elements
AhWRKY56	AT~TATA-box	273	279	core promotor element	promoter related elements
AhWRKY56	AT~TATA-box	275	281	core promotor element	promoter related elements
AhWRKY56	AT~TATA-box	277	283	core promotor element	promoter related elements
AhWRKY56	AT~TATA-box	279	285	core promotor element	promoter related elements
AhWRKY56	AT~TATA-box	281	287	core promotor element	promoter related elements
AhWRKY56	AT~TATA-box	283	289	core promotor element	promoter related elements
AhWRKY56	AT~TATA-box	285	291	core promotor element	promoter related elements
AhWRKY56	AT~TATA-box	287	293	core promotor element	promoter related elements
AhWRKY56	AT~TATA-box	289	295	core promotor element	promoter related elements
AhWRKY56	AT~TATA-box	291	297	core promotor element	promoter related elements
AhWRKY56	AT~TATA-box	646	654	core promotor element	promoter related elements
AhWRKY56	AT~TATA-box	648	654	core promotor element	promoter related elements
AhWRKY56	AT~TATA-box	650	656	core promotor element	promoter related elements
AhWRKY56	AT~TATA-box	668	674	core promotor element	promoter related elements
AhWRKY56	AT~TATA-box	670	676	core promotor element	promoter related elements
AhWRKY56	AT~TATA-box	759	765	core promotor element	promoter related elements
AhWRKY56	CAAT-box	901	906	common cis-acting element in promoter and enhancer regions	promoter related elements
AhWRKY56	CAAT-box	944	949	common cis-acting element in promoter and enhancer regions	promoter related elements
AhWRKY56	CAAT-box	997	1002	common cis-acting element in promoter and enhancer regions	promoter related elements
AhWRKY56	CAAT-box	1071	1076	common cis-acting element in promoter and enhancer regions	promoter related elements
AhWRKY56	CAAT-box	1356	1361	common cis-acting element in promoter and enhancer regions	promoter related elements
AhWRKY56	TATA	66	74	core promotor element	promoter related elements
AhWRKY56	TATA	70	78	core promotor element	promoter related elements
AhWRKY56	TATA	652	660	core promotor element	promoter related elements
AhWRKY56	TATA	734	742	core promotor element	promoter related elements
AhWRKY56	TATA	1042	1050	core promotor element	promoter related elements
AhWRKY56	TATA	1330	1338	core promotor element	promoter related elements
AhWRKY56	GT1-motif	1482	1488	light responsive element	Abiotic / biotic stress related elements
AhWRKY56	TATA-box	52	56	core promoter element around -30 of transcription start	promoter related elements
AhWRKY56	TATA-box	69	74	core promoter element around -30 of transcription start	promoter related elements
AhWRKY56	TATA-box	70	74	core promoter element around -30 of transcription start	promoter related elements
AhWRKY56	TATA-box	98	102	core promoter element around -30 of transcription start	promoter related elements
AhWRKY56	TATA-box	121	126	core promoter element around -30 of transcription start	promoter related elements
AhWRKY56	TATA-box	122	126	core promoter element around -30 of transcription start	promoter related elements
AhWRKY56	TATA-box	132	137	core promoter element around -30 of transcription start	promoter related elements
AhWRKY56	TATA-box	133	137	core promoter element around -30 of transcription start	promoter related elements
AhWRKY56	TATA-box	142	146	core promoter element around -30 of transcription start	promoter related elements
AhWRKY56	TATA-box	212	216	core promoter element around -30 of transcription start	promoter related elements
AhWRKY56	TATA-box	259	269	core promoter element around -30 of transcription start	promoter related elements
AhWRKY56	TATA-box	262	269	core promoter element around -30 of transcription start	promoter related elements
AhWRKY56	TATA-box	263	269	core promoter element around -30 of transcription start	promoter related elements
AhWRKY56	TATA-box	265	271	core promoter element around -30 of transcription start	promoter related elements
AhWRKY56	TATA-box	267	273	core promoter element around -30 of transcription start	promoter related elements
AhWRKY56	TATA-box	269	275	core promoter element around -30 of transcription start	promoter related elements
AhWRKY56	TATA-box	271	277	core promoter element around -30 of transcription start	promoter related elements
AhWRKY56	TATA-box	273	279	core promoter element around -30 of transcription start	promoter related elements
AhWRKY56	TATA-box	275	281	core promoter element around -30 of transcription start	promoter related elements
AhWRKY56	TATA-box	277	283	core promoter element around -30 of transcription start	promoter related elements
AhWRKY56	TATA-box	279	285	core promoter element around -30 of transcription start	promoter related elements
AhWRKY56	TATA-box	281	287	core promoter element around -30 of transcription start	promoter related elements
AhWRKY56	TATA-box	283	289	core promoter element around -30 of transcription start	promoter related elements
AhWRKY56	TATA-box	285	291	core promoter element around -30 of transcription start	promoter related elements
AhWRKY56	TATA-box	287	293	core promoter element around -30 of transcription start	promoter related elements
AhWRKY56	TATA-box	289	295	core promoter element around -30 of transcription start	promoter related elements
AhWRKY56	TATA-box	291	297	core promoter element around -30 of transcription start	promoter related elements
AhWRKY56	TATA-box	293	297	core promoter element around -30 of transcription start	promoter related elements
AhWRKY56	TATA-box	426	430	core promoter element around -30 of transcription start	promoter related elements
AhWRKY56	TATA-box	474	484	core promoter element around -30 of transcription start	promoter related elements
AhWRKY56	TATA-box	607	611	core promoter element around -30 of transcription start	promoter related elements
AhWRKY56	TATA-box	613	617	core promoter element around -30 of transcription start	promoter related elements
AhWRKY56	TATA-box	640	645	core promoter element around -30 of transcription start	promoter related elements
AhWRKY56	TATA-box	641	645	core promoter element around -30 of transcription start	promoter related elements
AhWRKY56	TATA-box	644	654	core promoter element around -30 of transcription start	promoter related elements
AhWRKY56	TATA-box	647	654	core promoter element around -30 of transcription start	promoter related elements
AhWRKY56	TATA-box	648	654	core promoter element around -30 of transcription start	promoter related elements
AhWRKY56	TATA-box	650	656	core promoter element around -30 of transcription start	promoter related elements
AhWRKY56	TATA-box	652	656	core promoter element around -30 of transcription start	promoter related elements
AhWRKY56	TATA-box	667	674	core promoter element around -30 of transcription start	promoter related elements
AhWRKY56	TATA-box	668	674	core promoter element around -30 of transcription start	promoter related elements
AhWRKY56	TATA-box	670	676	core promoter element around -30 of transcription start	promoter related elements
AhWRKY56	TATA-box	672	676	core promoter element around -30 of transcription start	promoter related elements
AhWRKY56	TATA-box	714	719	core promoter element around -30 of transcription start	promoter related elements
AhWRKY56	TATA-box	715	719	core promoter element around -30 of transcription start	promoter related elements
AhWRKY56	TATA-box	734	738	core promoter element around -30 of transcription start	promoter related elements
AhWRKY56	TATA-box	759	765	core promoter element around -30 of transcription start	promoter related elements
AhWRKY56	TATA-box	761	765	core promoter element around -30 of transcription start	promoter related elements
AhWRKY56	TATA-box	766	771	core promoter element around -30 of transcription start	promoter related elements
AhWRKY56	TATA-box	767	771	core promoter element around -30 of transcription start	promoter related elements
AhWRKY56	TATA-box	782	787	core promoter element around -30 of transcription start	promoter related elements
AhWRKY56	TATA-box	783	787	core promoter element around -30 of transcription start	promoter related elements
AhWRKY56	TATA-box	922	926	core promoter element around -30 of transcription start	promoter related elements
AhWRKY56	TATA-box	1045	1050	core promoter element around -30 of transcription start	promoter related elements
AhWRKY56	TATA-box	1046	1050	core promoter element around -30 of transcription start	promoter related elements
AhWRKY56	TATA-box	1179	1189	core promoter element around -30 of transcription start	promoter related elements
AhWRKY56	TATA-box	1181	1185	core promoter element around -30 of transcription start	promoter related elements
AhWRKY56	TATA-box	1241	1245	core promoter element around -30 of transcription start	promoter related elements
AhWRKY56	TATA-box	1250	1254	core promoter element around -30 of transcription start	promoter related elements
AhWRKY56	TATA-box	1324	1328	core promoter element around -30 of transcription start	promoter related elements
AhWRKY56	TATA-box	1333	1338	core promoter element around -30 of transcription start	promoter related elements
AhWRKY56	TATA-box	1334	1338	core promoter element around -30 of transcription start	promoter related elements
AhWRKY56	TATA-box	1371	1376	core promoter element around -30 of transcription start	promoter related elements
AhWRKY56	TATA-box	1372	1376	core promoter element around -30 of transcription start	promoter related elements
AhWRKY56	TATA-box	1475	1480	core promoter element around -30 of transcription start	promoter related elements
AhWRKY56	TATA-box	1476	1480	core promoter element around -30 of transcription start	promoter related elements
AhWRKY56	GA-motif	676	684	part of a light responsive element	Abiotic / biotic stress related elements
AhWRKY56	GA-motif	821	829	part of a light responsive element	Abiotic / biotic stress related elements
AhWRKY56	TCT-motif	482	488	part of a light responsive element	Abiotic / biotic stress related elements
AhWRKY78	AT~TATA-box	337	343	core promotor element	promoter related elements
AhWRKY78	AT~TATA-box	1278	1284	core promotor element	promoter related elements
AhWRKY78	AT~TATA-box	1408	1414	core promotor element	promoter related elements
AhWRKY78	AT~TATA-box	1440	1446	core promotor element	promoter related elements
AhWRKY78	TATA	477	485	core promotor element	promoter related elements
AhWRKY78	TATA	1271	1279	core promotor element	promoter related elements
AhWRKY78	TATA	1420	1428	core promotor element	promoter related elements
AhWRKY78	GATA-motif	1296	1307	part of a light responsive element	Abiotic / biotic stress related elements
AhWRKY78	TATA-box	48	53	core promoter element around -30 of transcription start	promoter related elements
AhWRKY78	TATA-box	49	53	core promoter element around -30 of transcription start	promoter related elements
AhWRKY78	TATA-box	302	307	core promoter element around -30 of transcription start	promoter related elements
AhWRKY78	TATA-box	303	307	core promoter element around -30 of transcription start	promoter related elements
AhWRKY78	TATA-box	337	343	core promoter element around -30 of transcription start	promoter related elements
AhWRKY78	TATA-box	339	343	core promoter element around -30 of transcription start	promoter related elements
AhWRKY78	TATA-box	383	388	core promoter element around -30 of transcription start	promoter related elements
AhWRKY78	TATA-box	384	388	core promoter element around -30 of transcription start	promoter related elements
AhWRKY78	TATA-box	480	485	core promoter element around -30 of transcription start	promoter related elements
AhWRKY78	TATA-box	481	485	core promoter element around -30 of transcription start	promoter related elements
AhWRKY78	TATA-box	529	533	core promoter element around -30 of transcription start	promoter related elements
AhWRKY78	TATA-box	976	981	core promoter element around -30 of transcription start	promoter related elements
AhWRKY78	TATA-box	977	981	core promoter element around -30 of transcription start	promoter related elements
AhWRKY78	TATA-box	1155	1159	core promoter element around -30 of transcription start	promoter related elements
AhWRKY78	TATA-box	1173	1177	core promoter element around -30 of transcription start	promoter related elements
AhWRKY78	TATA-box	1250	1255	core promoter element around -30 of transcription start	promoter related elements
AhWRKY78	TATA-box	1251	1255	core promoter element around -30 of transcription start	promoter related elements
AhWRKY78	TATA-box	1271	1275	core promoter element around -30 of transcription start	promoter related elements
AhWRKY78	TATA-box	1278	1284	core promoter element around -30 of transcription start	promoter related elements
AhWRKY78	TATA-box	1280	1284	core promoter element around -30 of transcription start	promoter related elements
AhWRKY78	TATA-box	1316	1321	core promoter element around -30 of transcription start	promoter related elements
AhWRKY78	TATA-box	1317	1321	core promoter element around -30 of transcription start	promoter related elements
AhWRKY78	TATA-box	1325	1330	core promoter element around -30 of transcription start	promoter related elements
AhWRKY78	TATA-box	1326	1330	core promoter element around -30 of transcription start	promoter related elements
AhWRKY78	TATA-box	1408	1414	core promoter element around -30 of transcription start	promoter related elements
AhWRKY78	TATA-box	1410	1414	core promoter element around -30 of transcription start	promoter related elements
AhWRKY78	TATA-box	1423	1428	core promoter element around -30 of transcription start	promoter related elements
AhWRKY78	TATA-box	1424	1428	core promoter element around -30 of transcription start	promoter related elements
AhWRKY78	TATA-box	1439	1446	core promoter element around -30 of transcription start	promoter related elements
AhWRKY78	TATA-box	1440	1446	core promoter element around -30 of transcription start	promoter related elements
AhWRKY78	TATA-box	1442	1446	core promoter element around -30 of transcription start	promoter related elements
AhWRKY78	TCT-motif	934	940	part of a light responsive element	Abiotic / biotic stress related elements
AhWRKY24	as-1	582	587	Part of the promoter of the Arabidopsis gene encoding Pro dehydrogenase (ProDH), a mitochondrial enzyme involved in the first step of the conversion of Pro to glutamic acid.	Abiotic / biotic stress related elements
AhWRKY24	as-1	659	664	Part of the promoter of the Arabidopsis gene encoding Pro dehydrogenase (ProDH), a mitochondrial enzyme involved in the first step of the conversion of Pro to glutamic acid.	Abiotic / biotic stress related elements
AhWRKY24	W box	652	658	elicitation; wounding and pathogen responsievness. Binds WRKY type transcription factors	Abiotic / biotic stress related elements
AhWRKY24	AT~TATA-box	49	55	core promotor element	promoter related elements
AhWRKY24	AT~TATA-box	547	553	core promotor element	promoter related elements
AhWRKY24	AT~TATA-box	1186	1192	core promotor element	promoter related elements
AhWRKY24	AT~TATA-box	1433	1439	core promotor element	promoter related elements
AhWRKY24	AT~TATA-box	1435	1441	core promotor element	promoter related elements
AhWRKY24	STRE	345	350	activation by heat shock, osmotic stress, low pH, nutrient starvation	Abiotic / biotic stress related elements
AhWRKY24	STRE	1199	1204	activation by heat shock, osmotic stress, low pH, nutrient starvation	Abiotic / biotic stress related elements
AhWRKY24	CAAT-box	238	243	common cis-acting element in promoter and enhancer regions	promoter related elements
AhWRKY24	CAAT-box	1043	1048	common cis-acting element in promoter and enhancer regions	promoter related elements
AhWRKY24	CAAT-box	1265	1270	common cis-acting element in promoter and enhancer regions	promoter related elements
AhWRKY24	G-box	634	640	cis-acting regulatory element involved in light responsiveness	Abiotic / biotic stress related elements
AhWRKY24	G-box	678	684	cis-acting regulatory element involved in light responsiveness	Abiotic / biotic stress related elements
AhWRKY24	G-box	993	999	cis-acting regulatory element involved in light responsiveness	Abiotic / biotic stress related elements
AhWRKY24	TATA-box	49	55	core promoter element around -30 of transcription start	promoter related elements
AhWRKY24	TATA-box	51	55	core promoter element around -30 of transcription start	promoter related elements
AhWRKY24	TATA-box	139	143	core promoter element around -30 of transcription start	promoter related elements
AhWRKY24	TATA-box	243	247	core promoter element around -30 of transcription start	promoter related elements
AhWRKY24	TATA-box	414	419	core promoter element around -30 of transcription start	promoter related elements
AhWRKY24	TATA-box	415	419	core promoter element around -30 of transcription start	promoter related elements
AhWRKY24	TATA-box	453	457	core promoter element around -30 of transcription start	promoter related elements
AhWRKY24	TATA-box	478	482	core promoter element around -30 of transcription start	promoter related elements
AhWRKY24	TATA-box	480	488	core promoter element around -30 of transcription start	promoter related elements
AhWRKY24	TATA-box	546	553	core promoter element around -30 of transcription start	promoter related elements
AhWRKY24	TATA-box	547	553	core promoter element around -30 of transcription start	promoter related elements
AhWRKY24	TATA-box	549	553	core promoter element around -30 of transcription start	promoter related elements
AhWRKY24	TATA-box	554	559	core promoter element around -30 of transcription start	promoter related elements
AhWRKY24	TATA-box	555	559	core promoter element around -30 of transcription start	promoter related elements
AhWRKY24	TATA-box	906	911	core promoter element around -30 of transcription start	promoter related elements
AhWRKY24	TATA-box	1168	1173	core promoter element around -30 of transcription start	promoter related elements
AhWRKY24	TATA-box	1169	1173	core promoter element around -30 of transcription start	promoter related elements
AhWRKY24	TATA-box	1186	1192	core promoter element around -30 of transcription start	promoter related elements
AhWRKY24	TATA-box	1188	1192	core promoter element around -30 of transcription start	promoter related elements
AhWRKY24	TATA-box	1240	1244	core promoter element around -30 of transcription start	promoter related elements
AhWRKY24	TATA-box	1433	1439	core promoter element around -30 of transcription start	promoter related elements
AhWRKY24	TATA-box	1435	1441	core promoter element around -30 of transcription start	promoter related elements
AhWRKY24	TATA-box	1437	1441	core promoter element around -30 of transcription start	promoter related elements
AhWRKY24	TATA-box	1452	1457	core promoter element around -30 of transcription start	promoter related elements
AhWRKY24	TATA-box	1453	1457	core promoter element around -30 of transcription start	promoter related elements
AhWRKY24	TCT-motif	996	1002	part of a light responsive element	Abiotic / biotic stress related elements
AhWRKY24	TCT-motif	1253	1259	part of a light responsive element	Abiotic / biotic stress related elements
AhWRKY24	ABRE	634	640	cis-acting element involved in the abscisic acid responsiveness	hormone related elements
AhWRKY24	ABRE	635	640	cis-acting element involved in the abscisic acid responsiveness	hormone related elements
AhWRKY24	ABRE	678	684	cis-acting element involved in the abscisic acid responsiveness	hormone related elements
AhWRKY24	ABRE	679	684	cis-acting element involved in the abscisic acid responsiveness	hormone related elements
AhWRKY24	ABRE	993	998	cis-acting element involved in the abscisic acid responsiveness	hormone related elements
AhWRKY42	as-1	304	309	Part of the promoter of the Arabidopsis gene encoding Pro dehydrogenase (ProDH), a mitochondrial enzyme involved in the first step of the conversion of Pro to glutamic acid.	Abiotic / biotic stress related elements
AhWRKY42	AT~TATA-box	189	197	core promotor element	promoter related elements
AhWRKY42	AT~TATA-box	191	197	core promotor element	promoter related elements
AhWRKY42	AT~TATA-box	444	450	core promotor element	promoter related elements
AhWRKY42	STRE	117	122	activation by heat shock, osmotic stress, low pH, nutrient starvation	Abiotic / biotic stress related elements
AhWRKY42	CAAT-box	625	630	common cis-acting element in promoter and enhancer regions	promoter related elements
AhWRKY42	CAAT-box	1003	1008	common cis-acting element in promoter and enhancer regions	promoter related elements
AhWRKY42	TATA	520	528	core promotor element	promoter related elements
AhWRKY42	GATA-motif	564	575	part of a light responsive element	Abiotic / biotic stress related elements
AhWRKY42	GATA-motif	1391	1398	part of a light responsive element	Abiotic / biotic stress related elements
AhWRKY42	GT1-motif	1050	1056	light responsive element	Abiotic / biotic stress related elements
AhWRKY42	TATA-box	142	146	core promoter element around -30 of transcription start	promoter related elements
AhWRKY42	TATA-box	187	197	core promoter element around -30 of transcription start	promoter related elements
AhWRKY42	TATA-box	190	197	core promoter element around -30 of transcription start	promoter related elements
AhWRKY42	TATA-box	191	197	core promoter element around -30 of transcription start	promoter related elements
AhWRKY42	TATA-box	193	197	core promoter element around -30 of transcription start	promoter related elements
AhWRKY42	TATA-box	247	251	core promoter element around -30 of transcription start	promoter related elements
AhWRKY42	TATA-box	254	258	core promoter element around -30 of transcription start	promoter related elements
AhWRKY42	TATA-box	330	334	core promoter element around -30 of transcription start	promoter related elements
AhWRKY42	TATA-box	423	427	core promoter element around -30 of transcription start	promoter related elements
AhWRKY42	TATA-box	444	450	core promoter element around -30 of transcription start	promoter related elements
AhWRKY42	TATA-box	446	450	core promoter element around -30 of transcription start	promoter related elements
AhWRKY42	TATA-box	523	528	core promoter element around -30 of transcription start	promoter related elements
AhWRKY42	TATA-box	524	528	core promoter element around -30 of transcription start	promoter related elements
AhWRKY42	TATA-box	825	829	core promoter element around -30 of transcription start	promoter related elements
AhWRKY42	TATA-box	1204	1212	core promoter element around -30 of transcription start	promoter related elements
AhWRKY42	TATA-box	1309	1317	core promoter element around -30 of transcription start	promoter related elements
AhWRKY42	TCT-motif	97	103	part of a light responsive element	Abiotic / biotic stress related elements
AhWRKY42	ABRE	869	874	cis-acting element involved in the abscisic acid responsiveness	hormone related elements
AhWRKY42	ABRE	1094	1099	cis-acting element involved in the abscisic acid responsiveness	hormone related elements
AhWRKY155	CAT-box	416	422	cis-acting regulatory element related to meristem expression	development-related elements
AhWRKY155	as-1	1227	1232	Part of the promoter of the Arabidopsis gene encoding Pro dehydrogenase (ProDH), a mitochondrial enzyme involved in the first step of the conversion of Pro to glutamic acid.	Abiotic / biotic stress related elements
AhWRKY155	TATA	174	182	core promotor element	promoter related elements
AhWRKY155	TATA	860	868	core promotor element	promoter related elements
AhWRKY155	TATA	1049	1057	core promotor element	promoter related elements
AhWRKY155	AT~TATA-box	494	500	core promotor element	promoter related elements
AhWRKY155	AT~TATA-box	651	657	core promotor element	promoter related elements
AhWRKY155	AT~TATA-box	734	740	core promotor element	promoter related elements
AhWRKY155	AT~TATA-box	761	767	core promotor element	promoter related elements
AhWRKY155	AT~TATA-box	858	864	core promotor element	promoter related elements
AhWRKY155	AT~TATA-box	1393	1399	core promotor element	promoter related elements
AhWRKY155	AT~TATA-box	1395	1401	core promotor element	promoter related elements
AhWRKY155	STRE	1429	1434	activation by heat shock, osmotic stress, low pH, nutrient starvation	Abiotic / biotic stress related elements
AhWRKY155	CAAT-box	462	467	common cis-acting element in promoter and enhancer regions	promoter related elements
AhWRKY155	CAAT-box	470	475	common cis-acting element in promoter and enhancer regions	promoter related elements
AhWRKY155	CAAT-box	588	593	common cis-acting element in promoter and enhancer regions	promoter related elements
AhWRKY155	CAAT-box	1330	1335	common cis-acting element in promoter and enhancer regions	promoter related elements
AhWRKY155	G-box	1264	1270	cis-acting regulatory element involved in light responsiveness	Abiotic / biotic stress related elements
AhWRKY155	GT1-motif	1416	1422	light responsive element	Abiotic / biotic stress related elements
AhWRKY155	HD-Zip 1	618	631	element involved in differentiation of the palisade mesophyll cells	development-related elements
AhWRKY155	TATA-box	106	111	core promoter element around -30 of transcription start	promoter related elements
AhWRKY155	TATA-box	107	111	core promoter element around -30 of transcription start	promoter related elements
AhWRKY155	TATA-box	129	133	core promoter element around -30 of transcription start	promoter related elements
AhWRKY155	TATA-box	174	178	core promoter element around -30 of transcription start	promoter related elements
AhWRKY155	TATA-box	342	346	core promoter element around -30 of transcription start	promoter related elements
AhWRKY155	TATA-box	389	393	core promoter element around -30 of transcription start	promoter related elements
AhWRKY155	TATA-box	397	402	core promoter element around -30 of transcription start	promoter related elements
AhWRKY155	TATA-box	398	402	core promoter element around -30 of transcription start	promoter related elements
AhWRKY155	TATA-box	494	500	core promoter element around -30 of transcription start	promoter related elements
AhWRKY155	TATA-box	496	500	core promoter element around -30 of transcription start	promoter related elements
AhWRKY155	TATA-box	548	556	core promoter element around -30 of transcription start	promoter related elements
AhWRKY155	TATA-box	550	558	core promoter element around -30 of transcription start	promoter related elements
AhWRKY155	TATA-box	651	657	core promoter element around -30 of transcription start	promoter related elements
AhWRKY155	TATA-box	653	657	core promoter element around -30 of transcription start	promoter related elements
AhWRKY155	TATA-box	733	740	core promoter element around -30 of transcription start	promoter related elements
AhWRKY155	TATA-box	734	740	core promoter element around -30 of transcription start	promoter related elements
AhWRKY155	TATA-box	736	740	core promoter element around -30 of transcription start	promoter related elements
AhWRKY155	TATA-box	761	767	core promoter element around -30 of transcription start	promoter related elements
AhWRKY155	TATA-box	763	767	core promoter element around -30 of transcription start	promoter related elements
AhWRKY155	TATA-box	798	806	core promoter element around -30 of transcription start	promoter related elements
AhWRKY155	TATA-box	826	834	core promoter element around -30 of transcription start	promoter related elements
AhWRKY155	TATA-box	858	864	core promoter element around -30 of transcription start	promoter related elements
AhWRKY155	TATA-box	860	864	core promoter element around -30 of transcription start	promoter related elements
AhWRKY155	TATA-box	918	922	core promoter element around -30 of transcription start	promoter related elements
AhWRKY155	TATA-box	930	935	core promoter element around -30 of transcription start	promoter related elements
AhWRKY155	TATA-box	931	935	core promoter element around -30 of transcription start	promoter related elements
AhWRKY155	TATA-box	1040	1044	core promoter element around -30 of transcription start	promoter related elements
AhWRKY155	TATA-box	1049	1053	core promoter element around -30 of transcription start	promoter related elements
AhWRKY155	TATA-box	1056	1064	core promoter element around -30 of transcription start	promoter related elements
AhWRKY155	TATA-box	1072	1080	core promoter element around -30 of transcription start	promoter related elements
AhWRKY155	TATA-box	1129	1133	core promoter element around -30 of transcription start	promoter related elements
AhWRKY155	TATA-box	1149	1154	core promoter element around -30 of transcription start	promoter related elements
AhWRKY155	TATA-box	1150	1154	core promoter element around -30 of transcription start	promoter related elements
AhWRKY155	TATA-box	1372	1376	core promoter element around -30 of transcription start	promoter related elements
AhWRKY155	TATA-box	1393	1399	core promoter element around -30 of transcription start	promoter related elements
AhWRKY155	TATA-box	1395	1401	core promoter element around -30 of transcription start	promoter related elements
AhWRKY155	TATA-box	1397	1401	core promoter element around -30 of transcription start	promoter related elements
AhWRKY155	TATA-box	1481	1485	core promoter element around -30 of transcription start	promoter related elements
AhWRKY155	GA-motif	596	604	part of a light responsive element	Abiotic / biotic stress related elements
AhWRKY155	TCT-motif	215	221	part of a light responsive element	Abiotic / biotic stress related elements
AhWRKY155	ABRE	1249	1254	cis-acting element involved in the abscisic acid responsiveness	hormone related elements
AhWRKY155	ABRE	1264	1270	cis-acting element involved in the abscisic acid responsiveness	hormone related elements
AhWRKY155	ABRE	1265	1270	cis-acting element involved in the abscisic acid responsiveness	hormone related elements
AhWRKY44	CAT-box	1175	1181	cis-acting regulatory element related to meristem expression	development-related elements
AhWRKY44	as-1	744	749	Part of the promoter of the Arabidopsis gene encoding Pro dehydrogenase (ProDH), a mitochondrial enzyme involved in the first step of the conversion of Pro to glutamic acid.	Abiotic / biotic stress related elements
AhWRKY44	as-1	940	945	Part of the promoter of the Arabidopsis gene encoding Pro dehydrogenase (ProDH), a mitochondrial enzyme involved in the first step of the conversion of Pro to glutamic acid.	Abiotic / biotic stress related elements
AhWRKY44	as-1	1141	1146	Part of the promoter of the Arabidopsis gene encoding Pro dehydrogenase (ProDH), a mitochondrial enzyme involved in the first step of the conversion of Pro to glutamic acid.	Abiotic / biotic stress related elements
AhWRKY44	as-1	1144	1149	Part of the promoter of the Arabidopsis gene encoding Pro dehydrogenase (ProDH), a mitochondrial enzyme involved in the first step of the conversion of Pro to glutamic acid.	Abiotic / biotic stress related elements
AhWRKY44	HD-Zip 3	605	620	protein binding site	site-binding related elements
AhWRKY44	TATA	373	381	core promotor element	promoter related elements
AhWRKY44	TATA	551	559	core promotor element	promoter related elements
AhWRKY44	TATA	571	579	core promotor element	promoter related elements
AhWRKY44	W box	951	957	elicitation; wounding and pathogen responsievness. Binds WRKY type transcription factors	Abiotic / biotic stress related elements
AhWRKY44	AT~TATA-box	76	82	core promotor element	promoter related elements
AhWRKY44	AT~TATA-box	204	210	core promotor element	promoter related elements
AhWRKY44	AT~TATA-box	462	468	core promotor element	promoter related elements
AhWRKY44	AT~TATA-box	464	470	core promotor element	promoter related elements
AhWRKY44	AT~TATA-box	773	779	core promotor element	promoter related elements
AhWRKY44	AT~TATA-box	775	781	core promotor element	promoter related elements
AhWRKY44	AT~TATA-box	783	789	core promotor element	promoter related elements
AhWRKY44	AT~TATA-box	785	791	core promotor element	promoter related elements
AhWRKY44	STRE	959	964	activation by heat shock, osmotic stress, low pH, nutrient starvation	Abiotic / biotic stress related elements
AhWRKY44	STRE	967	972	activation by heat shock, osmotic stress, low pH, nutrient starvation	Abiotic / biotic stress related elements
AhWRKY44	STRE	991	996	activation by heat shock, osmotic stress, low pH, nutrient starvation	Abiotic / biotic stress related elements
AhWRKY44	CAAT-box	325	330	common cis-acting element in promoter and enhancer regions	promoter related elements
AhWRKY44	CAAT-box	1392	1397	common cis-acting element in promoter and enhancer regions	promoter related elements
AhWRKY44	GATA-motif	252	263	part of a light responsive element	Abiotic / biotic stress related elements
AhWRKY44	G-box	129	135	cis-acting regulatory element involved in light responsiveness	Abiotic / biotic stress related elements
AhWRKY44	G-box	808	814	cis-acting regulatory element involved in light responsiveness	Abiotic / biotic stress related elements
AhWRKY44	G-box	973	979	cis-acting regulatory element involved in light responsiveness	Abiotic / biotic stress related elements
AhWRKY44	G-box	979	985	cis-acting regulatory element involved in light responsiveness	Abiotic / biotic stress related elements
AhWRKY44	TATA-box	75	82	core promoter element around -30 of transcription start	promoter related elements
AhWRKY44	TATA-box	76	82	core promoter element around -30 of transcription start	promoter related elements
AhWRKY44	TATA-box	78	82	core promoter element around -30 of transcription start	promoter related elements
AhWRKY44	TATA-box	184	189	core promoter element around -30 of transcription start	promoter related elements
AhWRKY44	TATA-box	185	189	core promoter element around -30 of transcription start	promoter related elements
AhWRKY44	TATA-box	204	210	core promoter element around -30 of transcription start	promoter related elements
AhWRKY44	TATA-box	206	210	core promoter element around -30 of transcription start	promoter related elements
[truncated: 7,844 more rows]

## Sheet: Number of cis-elements
Name of cis-elements	Number of cis-elements	Classification of cis-elements
ABRE	104	hormone related elements
AT~ABRE	1	hormone related elements
ACA-motif	1	Abiotic / biotic stress related elements
AE-box	46	Abiotic / biotic stress related elements
AP-1	4	Abiotic / biotic stress related elements
as-1	87	Abiotic / biotic stress related elements
ATC-motif	2	Abiotic / biotic stress related elements
Box II	1	Abiotic / biotic stress related elements
box S	7	Abiotic / biotic stress related elements
CAG-motif	2	Abiotic / biotic stress related elements
DRE core	3	Abiotic / biotic stress related elements
GA-motif	43	Abiotic / biotic stress related elements
Gap-box	16	Abiotic / biotic stress related elements
GATA-motif	29	Abiotic / biotic stress related elements
G-box	71	Abiotic / biotic stress related elements
GT1-motif	58	Abiotic / biotic stress related elements
GTGGC-motif	1	Abiotic / biotic stress related elements
MBS	33	Abiotic / biotic stress related elements
STRE	96	Abiotic / biotic stress related elements
TCT-motif	66	Abiotic / biotic stress related elements
W box	83	Abiotic / biotic stress related elements
CAT-box	37	development-related elements
HD-Zip 1	5	development-related elements
AT~TATA-box	152	promoter related elements
CAAT-box	147	promoter related elements
TATA	129	promoter related elements
TATA-box	158	promoter related elements
HD-Zip 3	7	site-binding related elements
